# Supplementary material for: Adaptation and validation of the Physical Activity Questionnaire for Adolescents (PAQ-A) among Polish adolescents: cross-sectional study
Source: PubMed Central journal article supplement — BMJ Open. 2019 Nov 18;9(11):e030567. doi: 10.1136/bmjopen-2019-030567 (PMC6887051; doi:10.1136/bmjopen-2019-030567), 2019-11-18
Supplement: bmjopen-2019-030567.draft_revisions.pdf [file bmjopen-2019-030567.draft_revisions.pdf]

# BMJ Open

BMJ Open is committed to open peer review. As part of this commitment we make the peer review history of every article we publish publicly available.

When an article is published we post the peer reviewers' comments and the authors' responses online. We also post the versions of the paper that were used during peer review. These are the versions that the peer review comments apply to.

The versions of the paper that follow are the versions that were submitted during the peer review process. They are not the versions of record or the final published versions. They should not be cited or distributed as the published version of this manuscript.

BMJ Open is an open access journal and the full, final, typeset and author-corrected version of record of the manuscript is available on our site with no access controls, subscription charges or pay-per-view fees (<http://bmjopen.bmj.com>).

If you have any questions on BMJ Open's open peer review process please email [info.bmjopen@bmj.com](mailto:info.bmjopen@bmj.com)

# BMJ Open

## Adaptation and validation of the Physical Activity Questionnaire for Adolescents (PAQ-A) among Polish adolescents

|                               |                                                                                                                                                                                                                                                                                                                                                                                                                                                                                                        |
|-------------------------------|--------------------------------------------------------------------------------------------------------------------------------------------------------------------------------------------------------------------------------------------------------------------------------------------------------------------------------------------------------------------------------------------------------------------------------------------------------------------------------------------------------|
| Journal:                      | <i>BMJ Open</i>                                                                                                                                                                                                                                                                                                                                                                                                                                                                                        |
| Manuscript ID                 | bmjopen-2019-030567                                                                                                                                                                                                                                                                                                                                                                                                                                                                                    |
| Article Type:                 | Research                                                                                                                                                                                                                                                                                                                                                                                                                                                                                               |
| Date Submitted by the Author: | 20-Mar-2019                                                                                                                                                                                                                                                                                                                                                                                                                                                                                            |
| Complete List of Authors:     | Wyszyńska, Justyna; Rzeszow University<br>Matłosz, Piotr; Rzeszow University, Faculty of Physical Education<br>Podgórska-Bednarz, Justyna; Rzeszow University, Medical Faculty<br>Herbert, Jarosław; Rzeszow University, Faculty of Physical Education<br>Przednowek, Krzysztof; Rzeszow University, Faculty of Physical Education<br>Baran, Joanna; Rzeszow University, Medical Faculty<br>Dereń, Katarzyna; Rzeszow University, Medical Faculty<br>Mazur, Artur; Rzeszow University, Medical Faculty |
| Keywords:                     | adolescent, physical activity, validation                                                                                                                                                                                                                                                                                                                                                                                                                                                              |
|                               |                                                                                                                                                                                                                                                                                                                                                                                                                                                                                                        |

SCHOLARONE™  
Manuscripts

1  
2  
3 **Adaptation and validation of the Physical Activity Questionnaire for Adolescents**  
4 **(PAQ-A) among Polish adolescents**  
5  
6  
7  
8  
9

10 Justyna Wyszynska<sup>1</sup>, Piotr Matłosz<sup>2</sup>, Justyna Podgórska-Bednarz<sup>1</sup>, Jarosław Herbert<sup>2</sup>,  
11 Krzysztof Przednowek<sup>2</sup>, Joanna Baran <sup>1</sup>, Katarzyna Dereń <sup>1</sup>, Artur Mazur <sup>1</sup>  
12  
13

- 14 1. Medical Faculty, University of Rzeszów, Poland  
15  
16 2. Faculty of Physical Education, University of Rzeszów, Poland  
17  
18  
19  
20

21 **Corresponding Author**  
22  
23

24 Justyna Wyszynska, Ph.D.

25 Email address: [justyna.wyszynska@onet.pl](mailto:justyna.wyszynska@onet.pl)  
26

27 Institute of Physiotherapy, Medical Faculty, University of Rzeszów  
28

29 Ul. Kopisto 2a  
30

31 35-959, Rzeszów, Poland  
32

33 ORCID: 0000-0002-5786-6214  
34  
35  
36  
37

38 **Word count:** 3914  
39  
40  
41  
42  
43  
44  
45  
46  
47  
48  
49  
50  
51  
52  
53  
54  
55  
56  
57  
58  
59  
60

## Abstract

*Objective.* The lack of a widely accepted questionnaire in Polish language, used to assess the physical activity (PA) of adolescents, create a need to introduce a reliable, repeatable, inexpensive and quick tool. This study was designed for cultural adaptation and validation of the Polish version of the Physical Activity Questionnaires for Adolescents (PAQ-A).

*Design.* Mixed-methods.

*Participants and outcome measures.* Cultural adaptation of the Polish version of the PAQ-A was performed following the standardized questionnaires cultural adaptation process. In a sample of 78 adolescents, aged 14 to 19 yrs, PAQ-A test-retest was administered with 1-week interval. Reliability was analysed by the Intraclass Correlation Coefficient (ICC) and the internal consistency by the Cronbach's  $\alpha$  coefficient. Participants completed the PAQ-A and wore an accelerometer for 7 consecutive days. The PAQ-A was compared against PA parameters obtained using the accelerometer.

*Results.* Test-retest reliability showed ICC = 0.97 for the total score of PAQ-A. Internal consistency was excellent ( $\alpha = 0.93$ ). The PAQ-A was very strongly correlated with steps per day ( $\rho = 0.94$ ) and strongly with MVPA ( $\rho = 0.71$ ) assessed by the accelerometer.

*Conclusions.* The polish version of PAQ-A it is the valuable tool to estimate general levels of PA among children from 14-19 yrs old.

*Keywords.* adaptation, adolescents, physical activity, validation

## Strengths and limitations of this study

- This study provides the first Physical Activity Questionnaires for Adolescents (PAQ-A) cultural adaptation and validation study among Polish adolescents aged 14-19 yrs.
- The Polish version of PAQ-A was compared with an objective measure of physical activity to determine the validity of the PAQ-A using triaxial accelerometry.
- In the study, we used international standards for validating questionnaires.
- In our study, we used cut-points by Butte et al., other cut-points would have yielded different results.

## Introduction

One of the most important factors determining human health is physical activity (PA), which is defined as the body movement resulting from skeletal muscle contraction, during which energy expenditure is increased. PA is an important factor in the prevention of chronic diseases such as obesity, hypertension or cardiovascular disease.<sup>1</sup>

According to the World Health Organization, the low level of PA is the fourth leading risk factor for global mortality.<sup>2</sup> Physical inactivity has become a major issue in public health.<sup>3,4</sup> All over the world, on average one third of adults are physically inactive.<sup>5</sup> The situation is even worse in the developmental age population. The data indicate that 80% of adolescents from 105 countries do not reach the recommended level of PA (60 min per day moderate to vigorous PA (MVPA) for 5 days a week).<sup>6</sup> The level of PA of Polish adolescents is one of the lowest in Europe, in addition, research results show that it is systematically decreasing.<sup>7</sup> With the reduction in the level of PA, an increase in the percentage of children with obesity is observed. Data from UNICEF report show that children in Poland gain weight the most rapidly in Europe. Within a decade, the number of overweight children has doubled in Poland.<sup>8</sup> Increasing the level of PA is a key element in the treatment of many diseases, especially obesity. The assessment of the level of PA is therefore the subject of a strong interest in public health research.

In order to assess the level of PA in adolescents, various objective and subjective methods can be used.<sup>9</sup> Examples of tools used to assess the level of PA are various physiological indicators, laboratory methods, direct observation, motion sensors and self-report measures.<sup>10</sup> Each measurement method, objective or subjective, has its advantages and disadvantages. Certain objective methods, such as heart rate monitoring, and the detection and registration of body movement require special equipment and are more difficult to perform in comparison to subjective measurements. Subjective methods of PA assessment (interviews, questionnaires) are preferred in large epidemiological studies due to their relatively low costs and low workload of the participant.<sup>11</sup>

Due to the lack of commonly accepted questionnaires in the Polish version, used to assess the level of PA of adolescents, there is a need to introduce a reliable, repeatable, inexpensive and quick tool. Such a tool in many countries is Physical Activity Questionnaire for Adolescents (PAQ-A), developed in Canada by Kowalski et al.<sup>12</sup> The results of the authors' research indicated that PAQ-A is a reliable, repeatable, inexpensive, easy and quick tool used

1  
2  
3 to assess PA in adolescents.<sup>12-14</sup> Cultural adaptation and validation of this questionnaire have  
4 not yet been assessed in Poland. The adaptation of a tool to assess the PA of adolescents will  
5 allow not only for easy and quick large-scale research, but also enables to compare results  
6 among countries.  
7  
8  
9

10 The main aim of the study was to assess the reliability and validity of a Polish version of  
11 the PAQ-A in adolescents.  
12  
13

## 14 **Methods**

### 15 *Participants*

16  
17  
18 The study was conducted in accordance with the ethical rules of the Helsinki  
19 Declaration. The study protocol was approved by the Bioethical Commission (REMOVED  
20 FOR REVIEW), approval number 9/05/2012. Prior to study commencement, we obtained  
21 written informed parent/guardian consent and written informed participant assent. We invited  
22 adolescents, aged 14-20 yrs, from 4 randomly selected middle and high schools to participate  
23 in a study (150 informed consents were distributed). Out of this number, 122  
24 parents/adolescents agreed to the participation in the study. Of these, 44 were excluded from  
25 the study for the following reasons: disease or injury preventing standard PA (n=2); removal  
26 of the accelerometer at any time during the study period (n=23); the device showing a  
27 mechanical error and/or operator error (incorrect epoch length, incorrect anthropometry or  
28 incorrect participant identification) (n = 8); and refusal to participate (n=1); failure to return or  
29 incompletely completed survey (n=10). Finally, 78 students (38 girls, 40 boys) were included  
30 in the analysis.  
31  
32  
33  
34  
35  
36  
37  
38  
39  
40  
41  
42  
43  
44

### 45 *Initial measurements*

46 Anthropometric measurements (body mass, body weight) were performed under  
47 standard conditions. Body height was measured in an upright position, barefoot, to the nearest  
48 0.1 cm using a portable stadiometer Seca 213. Body mass was assessed with an accuracy of  
49 0.1 kg using a body composition analyser (BC-420, Tanita). Body mass index (BMI) was  
50 calculated as weight (kg)/ height (m)<sup>2</sup>. Based on BMI values, the BMI percentile of individual  
51 participants were calculated. Polish BMI percentile charts specific for age, sex, and body  
52 height were used.<sup>15</sup> Based on the BMI percentile values, underweight (<5th percentile),  
53 healthy weight (between 5th and 85th percentile), overweight (BMI ≥85th percentile and <  
54 95th percentile), or obesity (≥95th percentile) were determined. The definitions of  
55  
56  
57  
58  
59  
60

1  
2  
3 underweight, healthy weight, overweight, and obesity were based on the recommendations of  
4 the Centers for Disease Control and Prevention.<sup>16</sup>  
5  
6  
7  
8

### 9 ***Physical Activity Questionnaire for Adolescents (PAQ-A)***

10  
11 The level of PA was assessed using Polish version of PAQ-A.<sup>12</sup> The PAQ-A is a self-  
12 administered, 7-day recall questionnaire that assesses participation in different PA, as well as  
13 activity during Physical Education, lunch break, after school, in the evenings and at weekend.  
14 The PAQ-A has been originally designed for adolescents aged 14 to 20. The questionnaire can  
15 be used to assess the level of PA during the school year, should not be used to assess PA  
16 during holidays. The questionnaire contains 8 questions that evaluate various aspects of PA of  
17 adolescents, taken during the last 7 days (during free time, during physical education classes,  
18 at different times during school days and during the weekend). Each question is scored  
19 according to a five-point scale (1-5), with "1" indicating low and "5" a high level of PA. The  
20 end result is the average value of the points obtained, with the higher scores corresponding to  
21 the higher level of PA. The answer to the last question (9) allows to get information whether  
22 the participant was ill or there were other circumstances that made it impossible to perform  
23 usual PA. However, the last question are not used as a part of the summary activity score.  
24  
25  
26  
27  
28  
29  
30  
31  
32  
33  
34  
35  
36

### 37 ***Cultural adaptation of the Polish PAQ-A***

38  
39 The PAQ-A author's approval was obtained for the process of linguistic adaptation and  
40 validation of the questionnaire. Cultural adaptation of the Polish PAQ-A was performed  
41 following the basic steps of standardized questionnaires cultural adaptation process.<sup>17</sup> The  
42 original version of PAQ-A has been translated into Polish by two independent translators who  
43 are fluent in English but whose native language is Polish. Then, during the meeting of both  
44 translators, both versions of the translations were compared. The final compatible version was  
45 agreed. It was evaluated by specialists in the field of physical education and health sciences,  
46 in terms of the unambiguity of understanding of the content included in the questions, the  
47 transparency of all items and their usefulness. The accepted version of the questionnaire was  
48 translated into English again. Back translation was made by two independent translators who  
49 do not know the original version of PAQ-A, whose native language was English (native  
50 speakers). During the meeting, both versions were compared and one, the most adequate, was  
51 determined. Then all discrepancies between the original version and the version resulting  
52  
53  
54  
55  
56  
57  
58  
59  
60

1  
2  
3 from the back translation were carefully analysed and corrected. Subsequently, PAQ-A was  
4 given to young people (n = 20) aged between 14 and 19 yrs in order to detect possible  
5 ambiguities in wording and assess the understanding of the questionnaire. During this  
6 analysis, students were encouraged to consult with researchers these questions or statements  
7 that were unintelligible or misleading. After the appropriate corrections were made, the Polish  
8 version of the research tool was agreed.  
9

### 14 *Accelerometry*

16  
17 The ActiGraph WGT3X-BT monitor device (Pensacola, USA) was used to assess  
18 PA.<sup>18</sup> It is a small device that provides data related to total PA, which includes frequency,  
19 intensity and duration. The Actigraph accelerometer has been shown to be a reliable and valid  
20 tool for the assessment of different types of PA.<sup>19,20</sup> The accelerometer was placed at waist  
21 with a flexible strap above the right hip bone to measure the number and frequency of  
22 participant's movements. The participants were instructed to wear the accelerometer for seven  
23 consecutive days, 24 hours a day, excluding activities in water (bath, swimming pool). The  
24 WGT3X-BT measures accelerations in the range of 0.05 to 2 g, which is digitized by a 12-bit  
25 analog-to digital converter at a rate of 30 Hz. Data was collected in 60s epochs. Non-wear  
26 time was defined as 60 min of consecutive zeros allowing for 2 min of non-zero interruptions.  
27 A wear time of  $\geq 500$  min/a day was used as the criterion for a valid day, and  $\geq 4$  days were  
28 used as the criteria for a valid 7-day period of accumulated data (in this  $\geq 3$  valid weekdays  
29 and  $\geq 1$  valid weekend day).<sup>21</sup> ActiGraph data was analysed using the dedicated Actilife 6.0  
30 software (ActiGraph LLC, Pensacola, Florida, USA). Using the cut-off points acc. Butte et  
31 al., different intensity of PA defined based counts per minute (CPM), including: sedentary  
32 activity (0-819 CPM), light (820-3907 CPM), moderate (3908-6111 CPM), vigorous ( $> 6112$   
33 CPM).<sup>22</sup>  
34  
35  
36  
37  
38  
39  
40  
41  
42  
43  
44  
45

### 47 *Procedure*

49 Following agreement to participate in the study, participants were examined (initial  
50 measurements) and received an accelerometer for 7 days. After 7 days, they were asked to  
51 complete the PAQ-A. Participants completed the PAQ-A again one week after completing the  
52 first questionnaire to assess test-retest reliability.  
53  
54  
55  
56  
57  
58  
59  
60



## Statistical analysis

Descriptive statistics (n, frequencies (%), mean±SD) were calculated for applicable variables. Test-retest reliability were assessed by intra-class correlation coefficient (ICC).<sup>23</sup> The internal consistency of the questionnaire was analysed using Cronbach's  $\alpha$  coefficient. Removing every item to confirm or exclude redundancy of the individual items was also performed by Cronbach's  $\alpha$ . Values greater than 0.7 deemed acceptable for general research purposes.<sup>24</sup> Validity was assessed by calculating the relationship between the PAQ-A scores and accelerometry-derived PA metrics. It was performed using Spearman's rank correlation coefficients (rho). Statistical significance was established as a  $p$  value less than 0.05. All analyses were carried out using GNU R Software.

## Results

Ninety nine participants provided valid and complete PAQ-A responses. Of those,  $n = 78$  met conservative accelerometry inclusion criteria of  $\geq 3$  valid weekdays and  $\geq 1$  valid weekend day. The mean age of the participants was  $15.7 \pm 1.41$  yrs. The general characteristics of the subjects are presented in Table 1.

Table 1. Sample characteristic

| Variables                                        | Total<br>(n=78) | Girls<br>(n=38) | Boys<br>(n=40) |
|--------------------------------------------------|-----------------|-----------------|----------------|
| Age [years] <sup>a</sup>                         | 15.70 ± 1.41    | 15.34 ± 1.30    | 16.05 ± 1.43   |
| Body height [cm] <sup>a</sup>                    | 167.43 ± 10.49  | 162.24 ± 7.44   | 172.26 ± 10.65 |
| Body weight [kg] <sup>a</sup>                    | 60.49 ± 13.09   | 56.90 ± 12.76   | 63.90 ± 12.63  |
| BMI percentile <sup>a</sup>                      | 56.66 ± 28.84   | 58.03 ± 29.41   | 55.38 ± 28.60  |
| Body mass category <sup>b</sup>                  |                 |                 |                |
| Underweight                                      | 5 (6.41)        | 3 (7.89)        | 2 (5.00)       |
| Healthy weight                                   | 56 (71.80)      | 26 (68.42)      | 30 (75.00)     |
| Overweight                                       | 12 (15.38)      | 5 (13.16)       | 7 (17.50)      |
| Obesity                                          | 5 (6.41)        | 4 (10.53)       | 1 (2.50)       |
| <b>PAQ-A<sup>a</sup></b>                         |                 |                 |                |
| Q1. Spare-time activity: sports                  | 1.85 ± 0.72     | 1.78 ± 0.72     | 1.92 ± 0.71    |
| Q2. Activity during physical education classes   | 3.27 ± 0.94     | 3.03 ± 0.85     | 3.50 ± 0.96    |
| Q3. Lunchtime activity                           | 2.59 ± 1.02     | 2.42 ± 1.08     | 2.75 ± 0.95    |
| Q4. After-school activity                        | 3.03 ± 1.01     | 2.76 ± 0.94     | 3.28 ± 1.01    |
| Q5. Evening activity                             | 2.95 ± 1.16     | 2.74 ± 1.16     | 3.15 ± 1.14    |
| Q6. Weekend-activity                             | 2.71 ± 1.11     | 2.55 ± 1.13     | 2.85 ± 1.08    |
| Q7. Activity frequency during the last 7 days    | 2.99 ± 1.23     | 2.82 ± 1.27     | 3.15 ± 1.19    |
| Q8. Activity frequency during each day last week | 3.09 ± 0.89     | 2.89 ± 0.87     | 3.29 ± 0.87    |
| PAQ-A total                                      | 2.82 ± 0.79     | 2.64 ± 0.80     | 2.99 ± 0.76    |
| <b>Accelerometry<sup>a</sup></b>                 |                 |                 |                |
| Energy expenditure [kcal/h]                      | 31.01 ± 15.28   | 25.04 ± 9.65    | 36.67 ± 17.47  |
| Total MVPA [min/h]                               | 4.02 ± 2.12     | 3.40 ± 1.94     | 4.61 ± 2.13    |
| Steps count per day                              | 6928 ± 3064     | 6184 ± 2650     | 7635 ± 3289    |

Data are expressed as: <sup>a</sup> - mean  $\pm$  SD; <sup>b</sup> - n (%)

Abbreviations: MVPA – moderate-to-vigorous physical activity; Q – question

Table 2 presents results, which indicate excellent test-retest reliability for the PAQ-A (ICC=0.97). Similar relationships were found among girls and boys separately (ICC = 0.96 and 0.97 approximately). Regarding individual item analyses, the lowest value (ICC = 0.86) was observed for item 5, which informs about evening activity.

Table 2. Test-retest reliability (ICC - intra-class correlation coefficient) for PAQ-A

| Variables                                        | Total (n=78) | Girls (n=38) | Boys (n=40) |
|--------------------------------------------------|--------------|--------------|-------------|
| PAQ-A total                                      | 0.97***      | 0.96***      | 0.97***     |
| Q1. Spare-time activity: sports                  | 0.97***      | 0.96***      | 0.98***     |
| Q2. Activity during physical education classes   | 0.87***      | 0.83***      | 0.88***     |
| Q3. Lunchtime activity                           | 0.91***      | 0.92***      | 0.89***     |
| Q4. After-school activity                        | 0.87***      | 0.82***      | 0.88***     |
| Q5. Evening activity                             | 0.86***      | 0.84***      | 0.88***     |
| Q6. Weekend-activity                             | 0.91***      | 0.89***      | 0.92***     |
| Q7. Activity frequency during the last 7 days    | 0.96***      | 0.94***      | 0.97***     |
| Q8. Activity frequency during each day last week | 0.98***      | 0.97***      | 0.99***     |

\*\*\* -  $p < 0.001$

The internal consistency coefficients of the questionnaire are presented in Table 3. The PAQ-A obtained a consistency of Cronbach's  $\alpha = 0.93$ . The internal consistency was reduced after removing single item, which may indicate that no redundant items are included in the questionnaire. Removing first and second items had the lowest values in the internal consistency, showing a high contribution to final test score.

Table 3. Internal consistency for PAQ-A

| Variables                                        | Cronbach's coefficient | Correlation (item-total) |
|--------------------------------------------------|------------------------|--------------------------|
| PAQ-A total                                      | <b>0.93</b>            | --                       |
| <b>Reliability if an item is dropped</b>         |                        |                          |
| Q1. Spare-time activity: sports                  | 0.93                   | 0.43                     |
| Q2. Activity during physical education classes   | 0.93                   | 0.49                     |
| Q3. Lunchtime activity                           | 0.92                   | 0.71                     |
| Q4. After-school activity                        | 0.92                   | 0.74                     |
| Q5. Evening activity                             | 0.91                   | 0.84                     |
| Q6. Weekend-activity                             | 0.91                   | 0.81                     |
| Q7. Activity frequency during the last 7 days    | 0.91                   | 0.85                     |
| Q8. Activity frequency during each day last week | 0.92                   | 0.74                     |

There were significant associations between PAQ-A total scores, its sub-items and accelerometry-derived PA metrics (Table 4). Overall, associations were stronger for the overall PAQ-A score than individual sub-items. The highest correlation was observed for the PAQ-A total score and number steps per day ( $\rho = 0.94$ ), and the lowest for the MVPA ( $\rho = 0.71$ ).

Table 4. Spearman's rank correlation between PAQ-A and accelerometry

| Variables                                        | Energy expenditure [kcal/h] | MVPA [min/h]   | Steps/day      |
|--------------------------------------------------|-----------------------------|----------------|----------------|
| Q1. Spare-time activity: sports                  | 0,58***                     | 0,39***        | 0,56***        |
| Q2. Activity during physical education classes   | 0,46***                     | 0,57***        | 0,52***        |
| Q3. Lunchtime activity                           | 0,51***                     | 0,38***        | 0,67***        |
| Q4. After-school activity                        | 0,63***                     | 0,55***        | 0,76***        |
| Q5. Evening activity                             | 0,58***                     | 0,66***        | 0,83***        |
| Q6. Weekend-activity                             | 0,53***                     | 0,63***        | 0,83***        |
| Q7. Activity frequency during the last 7 days    | 0,58***                     | 0,58***        | 0,82***        |
| Q8. Activity frequency during each day last week | 0,66***                     | 0,63***        | 0,74***        |
| <b>PAQ-A total</b>                               | <b>0,74***</b>              | <b>0,71***</b> | <b>0,94***</b> |

Abbreviation: MVPA –moderate-to-vigorous physical activity; \* -  $p < 0.05$ ; \*\* -  $p < 0.01$ ; \*\*\* -  $p < 0.001$

## Discussion

We found in the literature no questionnaires evaluating PA validated for Polish adolescents. Therefore, the present study is a pioneer in obtaining evidence of validity of a questionnaire developed by Kowalski et al. from Canada.<sup>12</sup> We present the first PAQ-A cultural adaptation and validation study among Polish adolescents aged 14-19 yrs. Excellent intraclass correlation and internal consistency, as well as strong or very strong convergent validity with accelerometer-based measures have provided evidence that the PAQ-A total score is a valuable measurement tool for large PA assessment studies with Polish children.

In the present study ICC for individual items of PAQ-A ranged from 0.86 to 0.97 for individual sub-items, which is strong evidence to support a good and excellent reliability.<sup>23</sup> Good ICC are observed for items 2, 4, and 5 (ICC = 0.87, 0.87 and 0.86, respectively), while excellent for the rest of sub-items. The reliability of the PAQ-A was good in other studies conducted in other countries and with adolescents of different races.<sup>14,25,26</sup>

An estimate of Cronbach's coefficient  $\alpha > 0.70$  is usually considered indicative of a reliable questionnaire.<sup>24,27</sup> Our results confirm the internal consistency of the questionnaire ( $\alpha$

1  
2  
3 = 0.93), which is in accordance with other studies reporting similar results, so Janz et al.  
4 reported 0.72 to 0.88 for PAQ-A measurements;<sup>14</sup> Aggio et al. reported 0.72,<sup>26</sup> and Bervoets  
5 et al. found an  $\alpha$  of 0.76 for Dutch adolescents.<sup>28</sup>  
6  
7

8  
9  
10 The PAQ-A was compared with an objective measure of PA to determine the validity  
11 of the PAQ-A using triaxial accelerometry. Accelerometers monitor PA by recording the  
12 acceleration of human movement. Movement sensors, such as pedometers and accelerometers  
13 are suggested as one of the best methods for the evaluation of PA and validation of self-report  
14 instruments of PA.<sup>29</sup> The convergent validity of the PAQ-A was assessed by calculating the  
15 correlation between the PAQ-A total score and different PA measures determined by  
16 accelerometer (energy expenditure, MVPA, number of steps per day). The Spearman correlation  
17 coefficients between the PAQ-A and accelerometer scores ranged from 0.71 to 0.94,  
18 indicating strong or very strong correlation between both instruments. Very strong correlation  
19 was found between the PAQ-A total score and number of steps per day ( $\rho = 0.94$ ). Strong  
20 correlations were observed between the PAQ-A total score and energy expenditure, as well as  
21 MVPA ( $\rho = 0.74$  and  $0.71$ , respectively). These correlations for MVPA were slightly higher  
22 than those obtained in the study reported by Janz et al. ( $\rho = 0.63$ ).<sup>14</sup> Our result does not  
23 concur with a validation study of the PAQ-A conducted on Spanish adolescents, which  
24 showed reasonable validity of the PAQ-A for adolescents aged from 12-17 yrs ( $\rho=0.39$ ).<sup>30</sup>  
25 Much lower than in our study, but significant correlation for MVPA were reported in Chinese  
26 population ( $\rho=0.33$ ). However, study was performed among children aged from 8 to 13 yrs  
27 old.<sup>31</sup> These data confirm a line of evidence suggesting that PA questionnaires for adolescents  
28 correlate better with scores obtain from accelerometer than PA questionnaires for children.<sup>32</sup>  
29  
30  
31  
32  
33  
34  
35  
36  
37  
38  
39  
40

41 The assessment of PA is an significant part of understanding patterns and influences of  
42 behaviour, designing interventions, and monitoring. To describe the level of PA, a  
43 standardized, reliable and valid tool is essential. Furthermore, in pediatric population it is  
44 important to use methods which are non-invasive, easy-to-use and time-saving. Among the  
45 available validated self-report measures of PA dedicated to youth, the most promising tool  
46 may be PAQ. The PAQ is easy to use and quick to administer self-report tool. There are two  
47 versions of PAQ depending on age of assessed students. PAQ-Children (PAQ-C) has been  
48 originally designed for children aged 8 to 14 and contains one more question about PA than  
49 PAQ-A (nine questions in total). Last question, both in PAQ-C and PAQ-A, are designed to  
50 identify children or adolescents who had unusual activity during the previous week. Strength  
51 of the both PAQ-C and PAQ-A is that they determine a general PA level for a whole week  
52 rather than trying to estimate overall frequency, intensity and duration with detailed questions.  
53  
54  
55  
56  
57  
58  
59  
60

1  
2  
3 The PAQ also provides specific information about activity levels at different periods of the  
4 day (e.g. recess, physical education, after school etc.).<sup>12</sup> Biddle et al. reviewed available self-  
5 report PA instruments developed for use with children and adolescents to assess their  
6 suitability and feasibility for use in population surveillance systems and tracking trends over  
7 time, particularly in Europe. Authors identified 20 activity-based measures of which three  
8 were supported by the majority of the expert group: PAQ-C and PAQ-A, Youth Risk  
9 Behaviour Surveillance Survey and the Teen Health Survey. These PA measurement  
10 instruments demonstrated both reliability and validity but also ease of use.<sup>33</sup>  
11  
12  
13  
14  
15  
16  
17

## 18 **Limitations**

19  
20  
21  
22 There are potential limitations of the study that need to be taken into account when  
23 interpreting the results. The PAQ-A is appropriate for high school students (approximately  
24 ages 14-20) who are currently in the school system. However, the age range of participants  
25 recruited in the current study was 14-19 yrs. This is due to the education system in Poland, in  
26 which students at the age of 19 finish high school. Moreover, no consensus currently exists as  
27 to the most accurate accelerometer sedentary behaviour cut-points for research with pediatric  
28 population.<sup>34</sup> In our study, we used cut-points that have been extensively used in pediatric  
29 research. Other cut-points would have yielded different results. Nonetheless, the relationships  
30 and differences with total PA will continue to be the same because this variable must not be  
31 highly dependent on cutoff values.  
32  
33  
34  
35  
36  
37  
38  
39  
40

## 41 **Conclusion**

42  
43 This is the first study that analyses validity and reliability of PAQ-A in Polish  
44 adolescents, which may help to applicability of the questionnaire. Our results show that the  
45 Polish version of PAQ-A, provide reliable and valid estimates of PA among 14 to 19-year-old  
46 adolescents. Polish version of PAQ-A can be considered as very useful in clinical practice and  
47 epidemiological studies to assess overall level of PA in adolescents.  
48  
49  
50  
51  
52  
53

## 54 **References**

- 55  
56  
57  
58 1. Daniels SR, Jacobson MS, McCrindle BW, *et al.* American Heart Association Childhood  
59 Obesity Research Summit: executive summary. *Circulation* 2009;**119**:2114-23.  
60

2. Guidelines Review Committee. Global Recommendations on Physical Activity for Health. Geneva: World Health Organization; 2010.
3. Blair S. Physical inactivity: the biggest public health problem of the 21st century. *Br J Sports Med* 2009;**43**:1-2.
4. Galán I, Boix R, Medrano MJ, *et al*. Physical activity and self-reported health status among adolescents: a cross-sectional population-based study. *BMJ Open* 2013;**3**:e002644.
5. Guthold R, Stevens GA, Riley LM, *et al*. Worldwide trends in insufficient physical activity from 2001 to 2016: a pooled analysis of 358 population-based surveys with 1·9 million participants. *Lancet Glob Health* 2018;**6**:e1077-86.
6. Hallal P, Andersen L, Bull F, *et al*. Global physical activity levels: surveillance progress, pitfalls, and prospects. *Lancet* 2012;**380**:247-57.
7. Special Eurobarometer 334: Sport and Physical Activity (2014), [https://data.europa.eu/euodp/pl/data/dataset/S776\\_72\\_3\\_EBS334](https://data.europa.eu/euodp/pl/data/dataset/S776_72_3_EBS334) (accessed March 1, 2019)
8. The State of the World's Children 2013, United Nations Children's Fund. UNICEF; 2013
9. Dollman J, Okely AD, Hardy L, *et al*. A hitchhiker's guide to assessing young people's physical activity: Deciding what method to use. *J Sci Med Sport* 2009;**12**:518-25.
10. Sylvia LG, Bernstein EE, Hubbard JL, *et al*. Practical guide to measuring physical activity. *J Acad Nutr Diet* 2013;**114**:199-208.
11. Booth M. Assessment of physical activity: an international perspective. *Res Q Exerc Sport* 2000;**71**:S114-20.
12. Kowalski KC, Crocker PRE, Donen RM. The Physical Activity Questionnaire for Older Children (PAQ-C) and Adolescents (PAQ-A) Manual. Canada: College of Kinesiology, University of Saskatchewan; 2004:1–38.
13. Kowalski KC, Crocker PRE, Kowalski NP. Convergent validity of the Physical Activity Questionnaire for Adolescents. *Pediatr Exerc Sci* 1997;**9**:342–52.
14. Janz KF, Lutuchy EM, Wenthe P, *et al*. Measuring activity in children and adolescents using self-report: PAQ-C and PAQ-A. *Med Sci Sports Exerc* 2008;**40**:767–72.
15. Kułaga Z, Rózdzyńska A, Palczewska I. Percentile charts of height, body mass and body mass index in children and adolescents in Poland – results of the OLAF study. *Stand Med* 2010;**7**:690–700.



16. Barlow SE, Expert Committee. Expert committee recommendations regarding the prevention, assessment, and treatment of child and adolescent overweight and obesity: summary report. *Pediatrics* 2007;**120**:S164–92.
17. Geisinger KF. Cross-cultural normative assessment: translation and adaptation issues influencing the normative interpretation of assessment instruments. *Psychol Assess* 1994;**6**:304-12.
18. Lee IM, Shiroma EJ. Using accelerometers to measure physical activity in large-scale epidemiological studies: issues and challenges. *Br J Sports Med* 2013;**48**:197-201.
19. Sasaki JE, John D, Freedson PS. Validation and comparison of ActiGraph activity monitors. *J Sci Med Sport* 2011;**14**:411-6.
20. Santos-Lozano A, Santin-Medeiros F, Cardon G, *et al.* Actigraph GT3X: validation and determination of physical activity intensity cut points. *Int J Sports Med* 2013;**34**:975-82.
21. Troiano RP, Berrigan D, Dodd KW, *et al.* Physical activity in the United States measured by accelerometer. *Med Sci Sports Exerc* 2008;**40**:181–8.
22. Butte NF, Wong WW, Lee JS, *et al.* Prediction of energy expenditure and physical activity in preschoolers. *Med Sci Sports Exerc* 2014;**46**:1216-26.
23. Koo TK, Li MY. A Guideline of Selecting and Reporting Intraclass Correlation Coefficients for Reliability Research. *J Chiropr Med* 2016;**15**:155-63.
24. Cronbach LJ. Coefficient alpha and the internal structure of tests. *Psychometrika* 1951;**16**:297-334.
25. Voss C, Dean PH, Gardner RF, *et al.* Validity and reliability of the Physical Activity Questionnaire for Children (PAQ-C) and Adolescents (PAQ-A) in individuals with congenital heart disease. *PLoS One* 2017;**12**:e0175806.
26. Aggio D, Fairclough S, Knowles Z, *et al.* Validity and reliability of a modified english version of the physical activity questionnaire for adolescents. *Arch Public Health* 2016;**74**:3.
27. Streiner DL. Starting at the beginning: an introduction to coefficient alpha and internal consistency. *J Pers Assess* 2003;**80**:99-103.
28. Bervoets L, Van Noten C, Van Roosbroeck S, *et al.* Reliability and Validity of the Dutch Physical Activity Questionnaires for Children (PAQ-C) and Adolescents (PAQ-A). *Arch Public Health* 2014;**72**:47.
29. Vanhelst J, Hardy L, Gottrand F, *et al.* Technical aspects and relevance of physical activity assessment in children and adolescents in free-living conditions. *Arch Pediatr* 2012;**19**:1219-25.

- 1  
2  
3 30. Martinez-Gomez D, Martinez-de-Haro V, Pozo T, *et al.* Reliability and validity of the  
4 PAQ-A questionnaire to assess physical activity in Spanish adolescents. *Rev Esp Salud*  
5 *Publica* 2009;**83**:427-39.  
6  
7  
8 31. Wang JJ, Baranowski T, Lau WP, *et al.* Validation of the Physical Activity Questionnaire  
9 for Older Children (PAQ-C) among Chinese Children. *Biomed Environ Sci* 2016;**29**:177-  
10 86.  
11  
12 32. Chinapaw MJM, Mokkink LB, van PoppelMNM, *et al.* Physical Activity Questionnaires  
13 for youth. A systematic review of measurement properties. *Sports Med* 2010;**40**:539-63.  
14  
15 33. Biddle SJ, Gorely T, Pearson N, *et al.* An assessment of self-reported physical activity  
16 instruments in young people for population surveillance: Project ALPHA. *Int J Behav*  
17 *Nutr Phys Act* 2011;**8**:1.  
18  
19 34. Cain KL, Sallis JF, Conway TL, *et al.* Using accelerometers in youth physical activity  
20 studies: A review of methods. *J Phys Act Health* 2013;**10**:437–50.  
21  
22  
23  
24  
25  
26  
27

### 28 **Acknowledgement**

29 We are grateful to the participants and their families who volunteered their time to participate  
30 in this research.  
31  
32

### 33 **Authors' contributions**

34 JW - development of the concept of research. JW, JBP, KD, JB, PM, JH – data compilation.  
35 KP, AM, JW, PM - analysis and interpretation of data. KP - statistical analysis. JW writing an  
36 manuscript. JPB, JB, KD - substantive review article. AM, PM - overseeing the final article.  
37 All authors read and approved the final version of the manuscript.  
38  
39  
40  
41  
42  
43  
44

### 45 **Funding**

46 This research received no specific grant from any funding agency in the public, commercial or  
47 not-for-profit sectors.  
48  
49

### 50 **Conflicts of interest**

51 The authors declare no conflict of interest.  
52  
53

### 54 **Data sharing statement**

55 The datasets generated and/or analysed during the current study are not publicly available due  
56 to protect the students' privacy, but are available from the corresponding author on reasonable  
57  
58  
59  
60



1  
2  
3 request.  
4  
5

6 **Additional file:** Polish version of Physical Activity Questionnaire for Adolescents (PAQ-A)  
7  
8  
9  
10  
11  
12  
13  
14  
15  
16  
17  
18  
19  
20  
21  
22  
23  
24  
25  
26  
27  
28  
29  
30  
31  
32  
33  
34  
35  
36  
37  
38  
39  
40  
41  
42  
43  
44  
45  
46  
47  
48  
49  
50  
51  
52  
53  
54  
55  
56  
57  
58  
59  
60

For peer review only

## Kwestionariusz Aktywności Fizycznej dla Młodzieży

### Polish version of the Physical Activity Questionnaire for Adolescents (PAQ-A)

Imię i nazwisko: \_\_\_\_\_

Wiek: \_\_\_\_\_

Płeć: K \_\_\_\_\_ M \_\_\_\_\_

Klasa: \_\_\_\_\_

Podajemy próbę oceny poziomu Twojej aktywności fizycznej w *ostatnich 7 dniach* (w ciągu ostatniego tygodnia). Odnosi się to do aktywności, które powodują, że się pocisz lub jesteś zmęczony/a, albo do zabaw, które sprawiają, że oddychasz z wysiłkiem, takich jak: podskakiwanie, bieganie, wspinanie się itp.

#### Pamiętaj:

- Nie ma złych lub dobrych odpowiedzi - to nie jest sprawdzian.

- Proszę, odpowiedz na wszystkie pytania tak szczerze i dokładnie jak potrafisz - to bardzo ważne.

#### 1. Aktywność fizyczna w Twoim wolnym czasie:

Czy wykonywałeś/aś którekolwiek z następujących czynności w ciągu *ostatnich 7 dni* (ostatniego tygodnia)? Jeśli tak, ile razy w tygodniu? (Zaznacz tylko jedno kółko w rzędzie).

|                            | 0                     | 1-2                   | 3-4                   | 5-6                   | 7 lub więcej<br>razy  |
|----------------------------|-----------------------|-----------------------|-----------------------|-----------------------|-----------------------|
| Skakanie na skakance       | <input type="radio"/> |
| Wiosłowanie/kajakowanie    | <input type="radio"/> |
| Jazda na rolkach           | <input type="radio"/> |
| Zabawa w berka             | <input type="radio"/> |
| Maszerowanie dla sportu    | <input type="radio"/> |
| Jazda na rowerze           | <input type="radio"/> |
| Jogging/bieganie           | <input type="radio"/> |
| Aerobik                    | <input type="radio"/> |
| Pływanie                   | <input type="radio"/> |
| Gra w palanta/baseball     | <input type="radio"/> |
| Taniec                     | <input type="radio"/> |
| Rugby/football amerykański | <input type="radio"/> |
| Badminton                  | <input type="radio"/> |
| Jazda na deskorolce        | <input type="radio"/> |
| Piłka nożna                | <input type="radio"/> |
| Hokej na ulicy             | <input type="radio"/> |
| Piłka siatkowa             | <input type="radio"/> |
| Unihokej                   | <input type="radio"/> |
| Piłka koszykowa            | <input type="radio"/> |
| Jazda na łyżwach           | <input type="radio"/> |
| Narciarstwo biegowe        | <input type="radio"/> |
| Hokej na lodzie            | <input type="radio"/> |
| Podnoszenie ciężarów       | <input type="radio"/> |
| Gimnastyka                 | <input type="radio"/> |
| Piłka ręczna               | <input type="radio"/> |
| Jazda na nartach           | <input type="radio"/> |
| Tenis ziemny               | <input type="radio"/> |
| Tenis stołowy              | <input type="radio"/> |
| Sporty/sztuki walki        | <input type="radio"/> |
| Jazda konna                | <input type="radio"/> |
| Inne:                      |                       |                       |                       |                       |                       |
| _____                      | <input type="radio"/> |
| _____                      | <input type="radio"/> |

2. **Jak często w ciągu ostatnich 7 dni, w trakcie *lekcji wychowania fizycznego (WF)* byłeś/aś bardzo aktywny/a (intensywne granie, bieganie, skakanie, rzucanie)?**  
(Zaznacz tylko jedną odpowiedź).

Nie brałem udziału w lekcji WF .....

Prawie nigdy .....

Czasami .....

Dosyć często .....

Zawsze .....

3. **Co zazwyczaj robiłeś/aś w czasie przerwy obiadowej w ciągu ostatnich 7 dni oprócz spożywania posiłku? (Zaznacz tylko jedną odpowiedź).**

Siedziałem/am (rozmawiając, czytając, odrabiając zadania domowe) ...

Stałem/am lub spacerowałem/am .....

Trochę biegałem/am lub grałem/am .....

Biegałem/am lub grałem/am dość dużo .....

Biegałem/am lub grałem/am intensywnie przez większość czasu .....

4. **W ciągu ostatnich 7 dni, przez ile dni *zaraz po szkole* uprawiałeś/aś jakiś sport, trenowałeś/aś taniec, lub grałeś/aś w gry, podczas których byłeś/aś bardzo aktywny/a?**  
(Zaznacz tylko jedną odpowiedź).

W żaden dzień .....

1 raz w tygodniu .....

2 lub 3 razy w tygodniu .....

4 razy w tygodniu .....

5 razy w tygodniu .....

5. **W ciągu ostatnich 7 dni, przez ile dni *wieczorami* uprawiałeś/aś jakiś sport, trenowałeś/aś taniec lub grałeś/aś w gry, podczas których byłeś/aś bardzo aktywny/a?**  
(Zaznacz tylko jedną odpowiedź).

W żaden dzień .....

1 raz w tygodniu .....

2 lub 3 razy w tygodniu .....

4 lub 5 razy w tygodniu .....

6 lub 7 razy w tygodniu .....

6. **Podczas ostatniego weekendu, ile razy uprawiałeś/aś jakiś sport, tańczyłeś/aś lub grałeś/aś w gry, podczas których byłeś/aś bardzo aktywny/a?**  
(Zaznacz tylko jedną odpowiedź).

Ani razu .....

1 raz .....

2 lub 3 razy .....

4 lub 5 razy .....

6 lub więcej razy .....

7. Które z następujących pięciu stwierdzeń najlepiej opisują Ciebie w ciągu ostatnich 7 dni? Przeczytaj *wszystkie pięć* stwierdzeń zanim zaznaczysz *jedną* odpowiedź odnoszącą się do Ciebie. (Zaznacz tylko jedną odpowiedź).

Cały lub większość czasu spędzałem/am wykonując rzeczy, które wymagały bardzo mało wysiłku fizycznego

Czasami (1-2 razy w zeszłym tygodniu) byłem/am aktywny/a fizycznie w wolnym czasie (np. uprawiałem/am jakiś sport, biegałem/am, jeździłem/am rowerem, pływałem/am, ćwiczyłem/am aerobik)

Często (3-4 razy w zeszłym tygodniu) byłem/am aktywny/a fizycznie w wolnym czasie

Dosyć często (5-6 razy w zeszłym tygodniu) byłem/am aktywny/a fizycznie w wolnym czasie

Bardzo często (7 lub więcej razy w zeszłym tygodniu) byłem/am aktywny/a fizycznie w wolnym czasie

8. Zaznacz jak często byłeś/aś aktywny/a fizycznie każdego dnia w ciągu ostatniego tygodnia (np. uprawiając jakiś sport, uczestnicząc w grach ruchowych, tańcząc lub wykonując inne formy aktywności fizycznej).

|              | Wcale                 | Trochę                | Średnio               | Często                | Bardzo często         |
|--------------|-----------------------|-----------------------|-----------------------|-----------------------|-----------------------|
| Poniedziałek | <input type="radio"/> |
| Wtorek       | <input type="radio"/> |
| Środa        | <input type="radio"/> |
| Czwartek     | <input type="radio"/> |
| Piątek       | <input type="radio"/> |
| Sobota       | <input type="radio"/> |
| Niedziela    | <input type="radio"/> |

9. Czy byłeś/aś chory/a w ciągu ostatniego tygodnia lub zdarzyło się coś, co powstrzymało Cię przed zwykle wykonywaną aktywnością fizyczną? (Zaznacz jedną opcję).

Tak .....

Nie .....

Jeśli tak, to co uniemożliwiło Ci podjęcie tej aktywności? \_\_\_\_\_

**STROBE 2007 (v4) checklist of items to be included in reports of observational studies in epidemiology\***  
**Checklist for cohort, case-control, and cross-sectional studies (combined)**

| Section/Topic             | Item # | Recommendation                                                                                                                                                                                                                                                                                                                                                                                                                                                         | Reported on page # |
|---------------------------|--------|------------------------------------------------------------------------------------------------------------------------------------------------------------------------------------------------------------------------------------------------------------------------------------------------------------------------------------------------------------------------------------------------------------------------------------------------------------------------|--------------------|
| Title and abstract        | 1      | (a) Indicate the study's design with a commonly used term in the title or the abstract                                                                                                                                                                                                                                                                                                                                                                                 | 1, 2               |
|                           |        | (b) Provide in the abstract an informative and balanced summary of what was done and what was found                                                                                                                                                                                                                                                                                                                                                                    | 2                  |
| <b>Introduction</b>       |        |                                                                                                                                                                                                                                                                                                                                                                                                                                                                        |                    |
| Background/rationale      | 2      | Explain the scientific background and rationale for the investigation being reported                                                                                                                                                                                                                                                                                                                                                                                   | 3, 4               |
| Objectives                | 3      | State specific objectives, including any pre-specified hypotheses                                                                                                                                                                                                                                                                                                                                                                                                      | 4                  |
| <b>Methods</b>            |        |                                                                                                                                                                                                                                                                                                                                                                                                                                                                        |                    |
| Study design              | 4      | Present key elements of study design early in the paper                                                                                                                                                                                                                                                                                                                                                                                                                | 6                  |
| Setting                   | 5      | Describe the setting, locations, and relevant dates, including periods of recruitment, exposure, follow-up, and data collection                                                                                                                                                                                                                                                                                                                                        | 4                  |
| Participants              | 6      | (a) <i>Cohort study</i> —Give the eligibility criteria, and the sources and methods of selection of participants. Describe methods of follow-up<br><i>Case-control study</i> —Give the eligibility criteria, and the sources and methods of case ascertainment and control selection. Give the rationale for the choice of cases and controls<br><i>Cross-sectional study</i> —Give the eligibility criteria, and the sources and methods of selection of participants | 4                  |
|                           |        | (b) <i>Cohort study</i> —For matched studies, give matching criteria and number of exposed and unexposed<br><i>Case-control study</i> —For matched studies, give matching criteria and the number of controls per case                                                                                                                                                                                                                                                 |                    |
| Variables                 | 7      | Clearly define all outcomes, exposures, predictors, potential confounders, and effect modifiers. Give diagnostic criteria, if applicable                                                                                                                                                                                                                                                                                                                               | 6                  |
| Data sources/ measurement | 8*     | For each variable of interest, give sources of data and details of methods of assessment (measurement). Describe comparability of assessment methods if there is more than one group                                                                                                                                                                                                                                                                                   | 4, 5, 6            |
| Bias                      | 9      | Describe any efforts to address potential sources of bias                                                                                                                                                                                                                                                                                                                                                                                                              |                    |
| Study size                | 10     | Explain how the study size was arrived at                                                                                                                                                                                                                                                                                                                                                                                                                              | 4                  |
| Quantitative variables    | 11     | Explain how quantitative variables were handled in the analyses. If applicable, describe which groupings were chosen and why                                                                                                                                                                                                                                                                                                                                           | 4                  |
| Statistical methods       | 12     | (a) Describe all statistical methods, including those used to control for confounding                                                                                                                                                                                                                                                                                                                                                                                  | 7                  |
|                           |        | (b) Describe any methods used to examine subgroups and interactions                                                                                                                                                                                                                                                                                                                                                                                                    | 7                  |
|                           |        | (c) Explain how missing data were addressed                                                                                                                                                                                                                                                                                                                                                                                                                            |                    |
|                           |        | (d) <i>Cohort study</i> —If applicable, explain how loss to follow-up was addressed<br><i>Case-control study</i> —If applicable, explain how matching of cases and controls was addressed                                                                                                                                                                                                                                                                              |                    |

|                          |     |                                                                                                                                                                                                              |     |
|--------------------------|-----|--------------------------------------------------------------------------------------------------------------------------------------------------------------------------------------------------------------|-----|
|                          |     | <i>Cross-sectional study</i> —If applicable, describe analytical methods taking account of sampling strategy                                                                                                 |     |
|                          |     | (e) Describe any sensitivity analyses                                                                                                                                                                        | 7   |
| <b>Results</b>           |     |                                                                                                                                                                                                              |     |
| Participants             | 13* | (a) Report numbers of individuals at each stage of study—eg numbers potentially eligible, examined for eligibility, confirmed eligible, included in the study, completing follow-up, and analysed            | 4   |
|                          |     | (b) Give reasons for non-participation at each stage                                                                                                                                                         | 4   |
|                          |     | (c) Consider use of a flow diagram                                                                                                                                                                           |     |
| Descriptive data         | 14* | (a) Give characteristics of study participants (eg demographic, clinical, social) and information on exposures and potential confounders                                                                     | 7   |
|                          |     | (b) Indicate number of participants with missing data for each variable of interest                                                                                                                          |     |
|                          |     | (c) <i>Cohort study</i> —Summarise follow-up time (eg, average and total amount)                                                                                                                             |     |
| Outcome data             | 15* | <i>Cohort study</i> —Report numbers of outcome events or summary measures over time                                                                                                                          |     |
|                          |     | <i>Case-control study</i> —Report numbers in each exposure category, or summary measures of exposure                                                                                                         |     |
|                          |     | <i>Cross-sectional study</i> —Report numbers of outcome events or summary measures                                                                                                                           | 7-9 |
| Main results             | 16  | (a) Give unadjusted estimates and, if applicable, confounder-adjusted estimates and their precision (eg, 95% confidence interval). Make clear which confounders were adjusted for and why they were included |     |
|                          |     | (b) Report category boundaries when continuous variables were categorized                                                                                                                                    |     |
|                          |     | (c) If relevant, consider translating estimates of relative risk into absolute risk for a meaningful time period                                                                                             |     |
| Other analyses           | 17  | Report other analyses done—eg analyses of subgroups and interactions, and sensitivity analyses                                                                                                               |     |
| <b>Discussion</b>        |     |                                                                                                                                                                                                              |     |
| Key results              | 18  | Summarise key results with reference to study objectives                                                                                                                                                     | 9   |
| Limitations              | 19  | Discuss limitations of the study, taking into account sources of potential bias or imprecision. Discuss both direction and magnitude of any potential bias                                                   | 11  |
| Interpretation           | 20  | Give a cautious overall interpretation of results considering objectives, limitations, multiplicity of analyses, results from similar studies, and other relevant evidence                                   | 11  |
| Generalisability         | 21  | Discuss the generalisability (external validity) of the study results                                                                                                                                        | 11  |
| <b>Other information</b> |     |                                                                                                                                                                                                              |     |
| Funding                  | 22  | Give the source of funding and the role of the funders for the present study and, if applicable, for the original study on which the present article is based                                                | 14  |

\*Give information separately for cases and controls in case-control studies and, if applicable, for exposed and unexposed groups in cohort and cross-sectional studies.

**Note:** An Explanation and Elaboration article discusses each checklist item and gives methodological background and published examples of transparent reporting. The STROBE checklist is best used in conjunction with this article (freely available on the Web sites of PLoS Medicine at <http://www.plosmedicine.org/>, Annals of Internal Medicine at <http://www.annals.org/>, and Epidemiology at <http://www.epidem.com/>). Information on the STROBE Initiative is available at [www.strobe-statement.org](http://www.strobe-statement.org).

# BMJ Open

## Adaptation and validation of the Physical Activity Questionnaire for Adolescents (PAQ-A) among Polish adolescents – cross-sectional study

|                                 |                                                                                                                                                                                                                                                                                                                                                                                                                                                                                                        |
|---------------------------------|--------------------------------------------------------------------------------------------------------------------------------------------------------------------------------------------------------------------------------------------------------------------------------------------------------------------------------------------------------------------------------------------------------------------------------------------------------------------------------------------------------|
| Journal:                        | <i>BMJ Open</i>                                                                                                                                                                                                                                                                                                                                                                                                                                                                                        |
| Manuscript ID                   | bmjopen-2019-030567.R1                                                                                                                                                                                                                                                                                                                                                                                                                                                                                 |
| Article Type:                   | Original research                                                                                                                                                                                                                                                                                                                                                                                                                                                                                      |
| Date Submitted by the Author:   | 23-Jul-2019                                                                                                                                                                                                                                                                                                                                                                                                                                                                                            |
| Complete List of Authors:       | Wyszyńska, Justyna; Rzeszow University<br>Matłosz, Piotr; Rzeszow University, Faculty of Physical Education<br>Podgórska-Bednarz, Justyna; Rzeszow University, Medical Faculty<br>Herbert, Jarosław; Rzeszow University, Faculty of Physical Education<br>Przednowek, Krzysztof; Rzeszow University, Faculty of Physical Education<br>Baran, Joanna; Rzeszow University, Medical Faculty<br>Dereń, Katarzyna; Rzeszow University, Medical Faculty<br>Mazur, Artur; Rzeszow University, Medical Faculty |
| <b>Primary Subject Heading</b>: | Public health                                                                                                                                                                                                                                                                                                                                                                                                                                                                                          |
| Secondary Subject Heading:      | Sports and exercise medicine                                                                                                                                                                                                                                                                                                                                                                                                                                                                           |
| Keywords:                       | adolescent, physical activity, validation                                                                                                                                                                                                                                                                                                                                                                                                                                                              |
|                                 |                                                                                                                                                                                                                                                                                                                                                                                                                                                                                                        |

SCHOLARONE™  
Manuscripts

1  
2  
3 **Adaptation and validation of the Physical Activity Questionnaire for Adolescents**  
4 **(PAQ-A) among Polish adolescents – cross-sectional study**  
5

6  
7 Justyna Wyszynska<sup>1</sup>, Piotr Matłosz<sup>2</sup>, Justyna Podgórska-Bednarz<sup>1</sup>, Jarosław Herbert<sup>2</sup>,  
8 Krzysztof Przednowek<sup>2</sup>, Joanna Baran<sup>1</sup>, Katarzyna Dereń<sup>1</sup>, Artur Mazur<sup>1</sup>  
9

- 10  
11 1. Medical Faculty, University of Rzeszów, Poland  
12 2. Faculty of Physical Education, University of Rzeszów, Poland  
13  
14  
15  
16  
17

18 **Corresponding Author**  
19

20 Justyna Wyszynska, Ph.D.  
21

22 Email address: [justyna.wyszynska@onet.pl](mailto:justyna.wyszynska@onet.pl)  
23

24 Institute of Physiotherapy, Medical Faculty, University of Rzeszów  
25

26 Ul. Kopisto 2a  
27

28 35-959, Rzeszów, Poland  
29

30 ORCID: 0000-0002-5786-6214  
31  
32  
33  
34

35 **Word count:** 3132  
36  
37  
38  
39  
40  
41  
42  
43  
44  
45  
46  
47  
48  
49  
50  
51  
52  
53  
54  
55  
56  
57  
58  
59  
60



## Abstract

*Objective.* The lack of a widely accepted questionnaire used to assess the physical activity of adolescents in the Polish language creates a need to introduce such a valid, reliable, inexpensive and quick tool for assessment. This study was designed to culturally adapt and validate the Physical Activity Questionnaires for Adolescents (PAQ-A) in the Polish language.

*Design.* Cross-sectional study.

*Participants and outcome measures.* Cultural adaptation of the Polish version of the PAQ-A was performed following the standardized questionnaires cultural adaptation process. In a sample of 78 adolescents aged 14 to 19 years, the PAQ-A test-retest was administered within a 1-week interval. Reliability was analysed by the Intraclass Correlation Coefficient (ICC) and internal consistency with Cronbach's  $\alpha$ . Participants completed the PAQ-A, and wore an accelerometer for 7 consecutive days. The PAQ-A was compared to physical activity parameters obtained using the accelerometer.

*Results.* Test-retest reliability showed ICC=0.97 for the total score of PAQ-A. Internal consistency was excellent ( $\alpha=0.93$ ). The PAQ-A was very strongly correlated with steps per day ( $\rho=0.94$ ) and with moderate-to-vigorous physical activity ( $\rho=0.81$ ) assessed by the accelerometer.

*Conclusions.* The Polish version of the PAQ-A is a valuable tool to estimate general levels of physical activity among adolescents from 14-19 years old.

*Keywords.* adaptation, adolescents, physical activity, validation

## Strengths and limitations of this study

- This study provides the first Physical Activity Questionnaire for Adolescents cultural adaptation and validation study among Polish adolescents aged 14-19 years.
- The Polish version of the Physical Activity Questionnaire for Adolescents was compared with a device-based measure of physical activity (triaxial accelerometry) to determine the validity of the questionnaire.
- In this study, we used international standards for validating the questionnaire.
- Limitations of this study are the small sample size and the relatively high dropout rate of participants due to accelerometer non-wear periods.

## Introduction

One of the most important factors determining human health is physical activity (PA), which is defined as body movement resulting from skeletal muscle contraction during which energy expenditure is increased.<sup>1</sup> Physical inactivity is responsible for about 3.2 million deaths per year, being one of the most important risk factors for non-communicable diseases such as coronary heart disease, type 2 diabetes, and cancer.<sup>2</sup> According to the World Health Organization, more than 80% of the world's adolescent population is insufficiently physically active.<sup>3</sup> Increasing evidence suggests that declining PA is a major factor for higher prevalence of childhood obesity.<sup>4</sup> Worldwide, over 340 million children and adolescents aged 5-19 were overweight or obese in 2016.<sup>5</sup> Physical activity is not only an important factor in the prevention of chronic diseases such as obesity, hypertension and cardiovascular diseases<sup>6</sup>; there is also evidence that regular participation in PA has a positive impact on psychosocial wellbeing, cognitive outcomes, and mental health.<sup>7</sup> Accurate measurement of PA is important to understanding the association between PA and health, but also to monitor changes in PA patterns, and to evaluate the effectiveness of interventions.

To assess PA level, valid and reliable measures are required. The doubly labeled water method is the most widely accepted technique and the gold standard for assessing total energy expenditure, however, it is not often used for research studies as it is expensive, time-intensive, and cannot capture qualitative data.<sup>8</sup> Self-report questionnaires, despite their limitations, are often used due to their low cost and ease of administration, ability to measure large samples and to contextualise PA.<sup>9</sup> Weaknesses of self-report questionnaires include, among others inaccuracies, the tendency to over-report PA levels, inability to use with young children (below the age of 10 or 11), and inability to compare results across studies due to the large number of measures available.<sup>10,11</sup> A more accurate estimate of PA is provided by device-based measures (such as accelerometers, pedometers, heart-rate monitors).<sup>11</sup> An advantage of accelerometers include minute-by-minute monitoring, capturing intensity level, large memory capacities,<sup>8</sup> and feasibility with young children.<sup>12</sup> However, accelerometers do not provide information on both the type and context of PA. Moreover, accelerometers are expensive and require technical expertise, specialized hardware, software, and individual programming.<sup>13</sup> Results of a systematic review that compared PA measures from accelerometers with PA scores of questionnaires, indicated that correlations between questionnaires and accelerometry were weak to moderate.<sup>14</sup> This finding is in agreement with previous reviews.<sup>15,16</sup>

1  
2  
3 A systematic review by Chinapaw et al. that examined 61 versions of PA questionnaires  
4 for youth found that none of the questionnaires included in the review had acceptable levels of  
5 reliability and validity according to guidelines described in the Qualitative Attributes and  
6 Measurement Properties of Physical Activity Questionnaires.<sup>17</sup> Biddle et al. also reviewed  
7 available self-report PA instruments developed for children and adolescents to assess their  
8 suitability and feasibility for use in population surveillance systems and tracking trends over  
9 time, particularly in Europe. The authors identified 20 activity-based measures, of which three  
10 were supported by the majority of the expert group: the Physical Activity Questionnaire for  
11 Older Children (PAQ-C) and the Physical Activity Questionnaire for Adolescents (PAQ-A),  
12 Youth Risk Behaviour Surveillance Survey, and the Teen Health Survey. These PA  
13 measurement instruments demonstrated both reliability and validity but also ease of use.<sup>9</sup>  
14  
15  
16  
17  
18  
19  
20  
21  
22

23 The PAQ-A was developed in Canada by Kowalski et al.<sup>18</sup> Research results by Kowalski  
24 and others indicate that PAQ-A is a reliable, inexpensive, easy and quick tool used to assess  
25 PA in adolescents.<sup>18-20</sup> Cultural adaptation and validation of this questionnaire has not yet  
26 been assessed in Poland. The adaptation of a tool to assess the PA of adolescents in Poland  
27 will allow not only for easy and quick large-scale research, but will also enable result  
28 comparison among countries.  
29  
30  
31  
32  
33

34 The main aim of this study was to assess the reliability and validity of a Polish version of  
35 the PAQ-A in adolescents.  
36  
37

## 38 **Methods**

### 39 *Study design and setting*

40  
41 A cross-sectional survey was conducted at 4 randomly selected middle and high  
42 schools in south-eastern Poland. Six classes were randomly selected from the schools  
43 representing students ranging from 14 to 19 years of age.  
44  
45  
46  
47  
48

### 49 *The PAQ-A*

50  
51 The PAQ-A is an 8-item, 7-day PA recall that assesses participation in various types  
52 of PA including activity during physical education, lunch break, after school, during evenings  
53 and weekends. A 9th item not used in the calculation of the activity score asks adolescents if  
54 they were sick or otherwise prevented from engaging in regular PA. The PAQ-A was  
55 originally designed for adolescents aged 14 to 20. The questionnaire can be used to assess the  
56 level of PA during the school year, but not during holidays. Each item is scored according to a  
57  
58  
59  
60

1  
2  
3 five-point scale (1-5), with "1" indicating low and "5" a high level of PA. The end result is the  
4 average value of the points obtained, with higher scores corresponding to a higher level of  
5 PA.<sup>18</sup>  
6  
7  
8  
9

### 10 ***Translation and cultural adaptation of the Polish PAQ-A***

11  
12 Author approval was obtained for the process of linguistic adaptation and validation of  
13 the PAQ-A questionnaire. Cultural adaptation of the Polish PAQ-A was performed following  
14 the basic steps of the standardized questionnaires cultural adaptation process.<sup>21</sup> The original  
15 version of PAQ-A was translated into Polish by two independent translators who are fluent in  
16 English but whose native language is Polish. Then, during a meeting of both translators, both  
17 versions of the translations were compared. A final compatible version was then agreed upon.  
18 It was evaluated by specialists in the field of physical education and health sciences, in terms  
19 of the unambiguity of understanding of the content included in the questions, the transparency  
20 of all items and their usefulness. The accepted version of the questionnaire was translated into  
21 English again. The back translation was made by two independent translators who had no  
22 knowledge of the original PAQ-A version, and whose native language was English (native  
23 speakers). During the meeting, both versions were compared and it was determined which one  
24 was most adequate. Then, all discrepancies between the original version and the version  
25 resulting from the back translation were carefully analysed and corrected. Subsequently, the  
26 PAQ-A was given to young people (n=20) aged between 14 and 19 years in order to detect  
27 possible ambiguities in wording and to assess the understanding of the questionnaire. During  
28 this analysis, students were encouraged to consult with researchers concerning questions or  
29 statements that were unintelligible or misleading. After the appropriate corrections were  
30 made, the final Polish version of the research tool was agreed upon. The Polish version of  
31 PAQ-A is presented in supplementary materials (Suppl. 1).  
32  
33  
34  
35  
36  
37  
38  
39  
40  
41  
42  
43  
44  
45  
46  
47

### 48 ***Study participants***

49  
50 The study was conducted in accordance with the ethical rules of the Helsinki  
51 Declaration. The study protocol was approved by the Bioethics Committee of the University  
52 of Rzeszów (Poland), approval number 9/05/2012. Prior to study commencement, we  
53 obtained written informed parent/guardian and participant consent. We invited adolescents,  
54 aged 14-19 years from 4 randomly selected middle and high schools to participate in this  
55 study (150 informed consents were distributed). Out of this number, 122 parents/adolescents  
56  
57  
58  
59  
60

1  
2  
3 agreed to participate in the study. Of these, 44 were excluded from the study for the following  
4 reasons: disease or injury preventing standard PA (n=2); participants without valid  
5 accelerometer-measurement period (n=23); the device showing a mechanical error and/or  
6 operator error (n=7); incorrect anthropometry (n=1); refusal to participate (n=1); failure to  
7 return or an incomplete survey (n=10). In total, 78 students (38 girls and 40 boys) were  
8 included in the analysis.  
9

### 14 ***Patient and public involvement***

15 Neither patients nor public were involved in the design or planning of this study.  
16

### 18 ***Initial measurements***

19 Anthropometric measurements (body mass, body weight) were performed under  
20 standard conditions. Body height was measured in an upright position, barefoot, to the nearest  
21 0.1 cm using a portable stadiometer (Seca 213). Body mass was assessed with an accuracy of  
22 0.1 kg using a body composition analyser (BC-420, Tanita). Body mass index (BMI) was  
23 calculated as weight (kg)/ height (m)<sup>2</sup>. Based on BMI values, the BMI percentile of individual  
24 participants were calculated. Polish BMI percentile charts specific for age, sex, and body  
25 height were used.<sup>22</sup> Based on the BMI percentile values, underweight (<5th percentile),  
26 healthy weight (between 5th and 85th percentile), overweight (BMI ≥85th percentile and <  
27 95th percentile), or obesity (≥95th percentile) were determined. The definitions of  
28 underweight, healthy weight, overweight, and obesity were based on the recommendations of  
29 the Centers for Disease Control and Prevention.<sup>23</sup>  
30  
31  
32  
33  
34  
35  
36  
37  
38  
39

### 41 ***Accelerometry***

42 An ActiGraph WGT3X-BT monitor device (Pensacola, USA) was used to assess PA.<sup>24</sup>  
43 It is a small device that provides data related to total PA including the frequency, intensity and  
44 duration. The Actigraph accelerometer has been shown to be a reliable and valid tool for the  
45 assessment of different types of PA.<sup>25,26,27</sup> The accelerometer was placed at the waist with a  
46 flexible strap above the right hip bone to measure the number and frequency of participant  
47 movement. The participants were instructed to wear the accelerometer for seven consecutive  
48 days, 24 hours a day, excluding water-based activities (baths, swimming). The Actigraph  
49 accelerometer measures accelerations in the range of 0.05 to 2 g, which is digitized by a 12-  
50 bit analog-to digital converter at a rate of 30 Hz. Data was collected in 5s epochs. Non-wear  
51 time was defined as 60 minutes of consecutive zeros allowing for 2 minutes of non-zero  
52  
53  
54  
55  
56  
57  
58  
59  
60

1  
2  
3 interruptions.<sup>28</sup> A wear time of  $\geq 500$  minutes/day was used as the criterion for a valid day,  
4 and  $\geq 4$  days were used as the criteria for a valid 7-day period of accumulated data (including  
5  $\geq 3$  valid weekdays and  $\geq 1$  valid weekend day).<sup>28</sup> For each participant, the mean moderate-to-  
6 vigorous physical activity (MVPA) (minutes/day) and the mean daily step count were  
7 calculated. The cut-off points from Evenson et al. were selected to determine the time spent  
8 on MVPA level ( $\geq 4012$  counts ng per minute).<sup>29</sup> MVPA time was calculated as the mean  
9 daily minutes  $\geq 2296$  counts per minute from all valid days. Daily step count was calculated  
10 as the mean daily step count from all valid days. ActiGraph data was analysed using dedicated  
11 Actilife 6.0 software (ActiGraph LLC, Pensacola, Florida, USA).  
12  
13  
14  
15  
16  
17  
18

### 19 *Procedure*

20  
21  
22 Following agreement to participate in the study, participants were examined (initial  
23 measurements) and received an accelerometer for 7 days. After 7 days the PAQ-A was  
24 delivered to students during school time in their classroom. Adolescents were asked to  
25 complete the questionnaire at home. Participants completed the PAQ-A again one week after  
26 completing the first questionnaire to assess test-retest reliability.  
27  
28  
29  
30

### 31 *Statistical analysis*

32  
33  
34 Descriptive statistics (n, frequencies (%), mean $\pm$ SD) were calculated for applicable variables.  
35 Test-retest reliability was assessed by intra-class correlation coefficient (ICC).<sup>30</sup> Values of  
36 ICC less than 0.5 are indicative of poor reliability; between 0.5 and 0.75 indicate moderate  
37 reliability; between 0.75 and 0.9 indicate good reliability, and greater than 0.90 indicate  
38 excellent reliability.<sup>31</sup> The internal consistency of the questionnaire was analysed using  
39 Cronbach's  $\alpha$  coefficient. Removing every item to confirm or exclude redundancy of the  
40 individual items was also performed by Cronbach's  $\alpha$ . Values of  $\alpha$  greater than 0.7 were  
41 deemed acceptable for general research purposes.<sup>32</sup> Validity was assessed by calculating the  
42 relationship between PAQ-A scores and accelerometry-derived PA metrics using Spearman's  
43 rank correlation coefficients( $\rho$ ). Values from 0.1 to 0.2 indicate poor correlation; from 0.3  
44 to 0.5 fair; from 0.6 to 0.7 moderate and  $\geq 0.8$  very strong correlation.<sup>33</sup> Statistical significance  
45 was established as a  $p$  value less than 0.05. All analyses were carried out using GNU R  
46 Software.  
47  
48  
49  
50  
51  
52  
53  
54  
55  
56  
57  
58  
59  
60



## Results

In total, 78 adolescents provided valid data for the PAQ-A and accelerometer measurements. The mean age of the participants was  $15.7 \pm 1.41$  years. The mean non-wear time recorded by the accelerometers was 477 minutes per day (minimum 326; maximum 840 minutes). The general characteristics of the participants are presented in Table 1.

**Table 1.** Sample characteristic

| Variables                                        | Total<br>(n=78) | Girls<br>(n=38) | Boys<br>(n=40) |
|--------------------------------------------------|-----------------|-----------------|----------------|
| Age [years] <sup>a</sup>                         | 15.70 ± 1.41    | 15.34 ± 1.30    | 16.05 ± 1.43   |
| Age [years] <sup>b</sup>                         |                 |                 |                |
| 14                                               | 12 (15.4)       | 8 (10.3)        | 4 (5.1)        |
| 15                                               | 14 (18.0)       | 7 (9.0)         | 7 (9.0)        |
| 16                                               | 16 (20.5)       | 9 (11.5)        | 7 (9.0)        |
| 17                                               | 12 (15.4)       | 4 (5.1)         | 8 (10.3)       |
| 18                                               | 11 (14.1)       | 3 (3.8)         | 8 (10.3)       |
| 19                                               | 13 (16.6)       | 7 (9.0)         | 6 (7.6)        |
| Body height [cm] <sup>a</sup>                    | 167.43 ± 10.49  | 162.24 ± 7.44   | 172.26 ± 10.65 |
| Body weight [kg] <sup>a</sup>                    | 60.49 ± 13.09   | 56.90 ± 12.76   | 63.90 ± 12.63  |
| BMI percentile <sup>a</sup>                      | 56.66 ± 28.84   | 58.03 ± 29.41   | 55.38 ± 28.60  |
| Body mass category <sup>b</sup>                  |                 |                 |                |
| Underweight                                      | 5 (6.41)        | 3 (7.89)        | 2 (5.00)       |
| Healthy weight                                   | 56 (71.80)      | 26 (68.42)      | 30 (75.00)     |
| Overweight                                       | 12 (15.38)      | 5 (13.16)       | 7 (17.50)      |
| Obesity                                          | 5 (6.41)        | 4 (10.53)       | 1 (2.50)       |
| <b>PAQ-A<sup>a</sup></b>                         |                 |                 |                |
| Q1. Spare-time activity: sports                  | 1.85 ± 0.72     | 1.78 ± 0.72     | 1.92 ± 0.71    |
| Q2. Activity during physical education classes   | 3.27 ± 0.94     | 3.03 ± 0.85     | 3.50 ± 0.96    |
| Q3. Lunchtime activity                           | 2.59 ± 1.02     | 2.42 ± 1.08     | 2.75 ± 0.95    |
| Q4. After-school activity                        | 3.03 ± 1.01     | 2.76 ± 0.94     | 3.28 ± 1.01    |
| Q5. Evening activity                             | 2.95 ± 1.16     | 2.74 ± 1.16     | 3.15 ± 1.14    |
| Q6. Weekend-activity                             | 2.71 ± 1.11     | 2.55 ± 1.13     | 2.85 ± 1.08    |
| Q7. Activity frequency during the last 7 days    | 2.99 ± 1.23     | 2.82 ± 1.27     | 3.15 ± 1.19    |
| Q8. Activity frequency during each day last week | 3.09 ± 0.89     | 2.89 ± 0.87     | 3.29 ± 0.87    |
| PAQ-A total                                      | 2.82 ± 0.79     | 2.64 ± 0.80     | 2.99 ± 0.76    |
| <b>Accelerometry<sup>a</sup></b>                 |                 |                 |                |
| MVPA [minutes/day]                               | 44.71 ± 17.24   | 39.86 ± 15.63   | 49.32 ± 17.61  |
| Steps count per day                              | 6928 ± 3064     | 6184 ± 2650     | 7635 ± 3289    |

Data are expressed as: <sup>a</sup> - mean ± SD; <sup>b</sup> - n (%)

Abbreviations: MVPA – moderate-to-vigorous physical activity; Q – question

Table 2 presents results which indicate excellent test-retest reliability for the PAQ-A (ICC=0.97). Similar relationships were found among girls and boys separately (ICC=0.96 and 0.97, respectively). Regarding individual item analyses, the lowest value (ICC=0.86) was observed for item 5, which informs about evening activity. The obtained correlations presented in Table 2 show statistical significance at the level of  $p < 0.01$ .

**Table 2.** Test-retest reliability (ICC - intra-class correlation coefficient) for PAQ-A

| Variables                                        | Total<br>(n=78) | Girls<br>(n=38) | Boys<br>(n=40) |
|--------------------------------------------------|-----------------|-----------------|----------------|
| PAQ-A total                                      | 0.97            | 0.96            | 0.97           |
| Q1. Spare-time activity: sports                  | 0.97            | 0.96            | 0.98           |
| Q2. Activity during physical education classes   | 0.87            | 0.83            | 0.88           |
| Q3. Lunchtime activity                           | 0.91            | 0.92            | 0.89           |
| Q4. After-school activity                        | 0.87            | 0.82            | 0.88           |
| Q5. Evening activity                             | 0.86            | 0.84            | 0.88           |
| Q6. Weekend-activity                             | 0.91            | 0.89            | 0.92           |
| Q7. Activity frequency during the last 7 days    | 0.96            | 0.94            | 0.97           |
| Q8. Activity frequency during each day last week | 0.98            | 0.97            | 0.99           |

The internal consistency coefficients of the questionnaire are presented in Table 3. The PAQ-A obtained an internal consistency of  $\alpha=0.93$ . The internal consistency was reduced after removing single items, which may indicate that no redundant items are included in the questionnaire. Removing the first and second items had the lowest values in internal consistency, showing a high contribution to final test score.

**Table 3.** Internal consistency for PAQ-A

| Variables                                                  | Cronbach's<br>coefficient, $\alpha$ | Correlation<br>(item-total) |
|------------------------------------------------------------|-------------------------------------|-----------------------------|
| PAQ-A total                                                | <b>0.93</b>                         | --                          |
| <b>Reliability with items (Q1-Q8) individually removed</b> |                                     |                             |
| Q1. Spare-time activity: sports                            | 0.93                                | 0.43                        |
| Q2. Activity during physical education classes             | 0.93                                | 0.49                        |
| Q3. Lunchtime activity                                     | 0.92                                | 0.71                        |
| Q4. After-school activity                                  | 0.92                                | 0.74                        |
| Q5. Evening activity                                       | 0.91                                | 0.84                        |
| Q6. Weekend-activity                                       | 0.91                                | 0.81                        |
| Q7. Activity frequency during the last 7 days              | 0.91                                | 0.85                        |
| Q8. Activity frequency during each day last week           | 0.92                                | 0.74                        |

Table 4 presents correlation between PAQ-A and accelerometry. Overall, associations were stronger for the overall PAQ-A score than individual sub-items. A higher correlation was observed between the PAQ-A total score and the number steps per day ( $\rho=0.94$ ) than between PAQ-A total score and MVPA ( $\rho=0.81$ ). The obtained Spearman correlation coefficients show statistical significance at the level of  $p < 0.01$ .



**Table 4.** Spearman's rank correlation between PAQ-A and accelerometry

| Variables                                        | MVPA<br>[minutes/day] | Steps/day   |
|--------------------------------------------------|-----------------------|-------------|
| Q1. Spare-time activity: sports                  | 0.56                  | 0.56        |
| Q2. Activity during physical education classes   | 0.46                  | 0.52        |
| Q3. Lunchtime activity                           | 0.58                  | 0.67        |
| Q4. After-school activity                        | 0.73                  | 0.76        |
| Q5. Evening activity                             | 0.70                  | 0.83        |
| Q6. Weekend-activity                             | 0.65                  | 0.83        |
| Q7. Activity frequency during the last 7 days    | 0.68                  | 0.82        |
| Q8. Activity frequency during each day last week | 0.60                  | 0.74        |
| <b>PAQ-A total</b>                               | <b>0.81</b>           | <b>0.94</b> |

Abbreviation: q – question; MVPA –moderate-to-vigorous physical activity

## Discussion

We found no questionnaires evaluating PA validated for Polish adolescents in the literature. Therefore, the present study is at the forefront of obtaining evidence for the validity of the questionnaire developed by Kowalski et al.<sup>18</sup> We present the first PAQ-A cultural adaptation and validation study among Polish adolescents aged 14-19 years. In general, the results of the present study show excellent reliability of the PAQ-A and a very strong correlation of the PAQ-A to accelerometer measurements. Our validity coefficients are higher than previously reported by other validation studies with adolescents.<sup>20,34,35</sup>

In the present study, the ICC for individual items of the PAQ-A ranged from 0.86 to 0.97 which is strong evidence to support good and excellent reliability.<sup>31</sup> Good ICC values were observed for items 2, 4, and 5 (ICC=0.87, 0.87 and 0.86, respectively), and excellent ICC values were found for the others. For the final score of the PAQ-A, test-retest reliability showed ICC = 0.97, which is strong evidence to support reliability of the PAQ-A in this target population. The reliability of the PAQ-A ranged from poor (ICC=0.40) among Vietnamese adolescents,<sup>36</sup> to good in other studies conducted in other countries with adolescents of different races.<sup>20,37,38</sup> Aggio et al. observed that the modified PAQ-A score was stable over time among British adolescents (ICC=0.78),<sup>38</sup> which was comparable with original research,<sup>19</sup> and subsequent reliability studies among Spanish adolescents (ICC=0.71).<sup>34</sup>

An estimate of Cronbach's coefficient  $\alpha$  greater than 0.70 is usually considered to be indicative of a reliable questionnaire.<sup>32</sup> In our study, Cronbach's  $\alpha$  coefficients showed excellent internal consistency ( $\alpha=0.93$ ), higher in comparison to the original,<sup>19</sup> and other

1  
2  
3 modified versions of the PAQ-A.<sup>20,34,38</sup> Item-total correlations were the lowest for questions  
4 on spare-time activity, activity during physical education classes and lunchtime, which is  
5 consistent with previous findings.<sup>20,34,38,39</sup> Janz et al. reported that Cronbach's  $\alpha$  for the PAQ-  
6 A ranged from 0.72 to 0.88. Moreover, authors suggested that that completing the  
7 questionnaire during the summer months did not reduce the standardized  $\alpha$  for the PAQ-A.<sup>20</sup>  
8 Among British adolescents Cronbach's  $\alpha$  coefficient for the modified PAQ-A score showed  
9 acceptable inter-item reliability ( $\alpha=0.72$ ). Item-total correlations showed how well each item  
10 correlated with the composite of the remaining items; correlations ranged from  $\alpha = 0.24$  to  
11 0.54 with all additional and modified questions exceeding  $\alpha=0.30$ .<sup>38</sup> Bervoets et al. also  
12 showed an acceptable reliability of PAQ-A for Dutch adolescents. Of all 94 PAQ-A  
13 questionnaires completed by adolescents, Cronbach's  $\alpha$  was 0.76.<sup>39</sup>

14  
15  
16  
17  
18  
19  
20  
21  
22 The PAQ-A was compared with device-based measures of PA to determine the  
23 validity of the PAQ-A using triaxial accelerometry. Accelerometers monitor PA by recording  
24 the acceleration of human movement. Movement sensors, such as pedometers and  
25 accelerometers are suggested as one of the best methods for evaluation of PA and validation  
26 of PA self-report instruments.<sup>40</sup> The convergent validity of the PAQ-A was assessed by  
27 calculating the correlation between the PAQ-A total score and different PA measures  
28 determined by an accelerometer (MVPA and number of steps per day). Very strong  
29 correlations were observed between the PAQ-A total score and number of steps per day  
30 ( $\rho=0.94$ ) and with MVPA ( $\rho=0.81$ ). This correlation for MVPA was higher than that  
31 obtained in the study reported by Janz et al. ( $\rho = 0.63$ ).<sup>20</sup> Our results do not concur with a  
32 validation study of the PAQ-A conducted on Spanish adolescents, which showed reasonable  
33 validity of the PAQ-A for adolescents aged from 12-17 years ( $\rho=0.39$ ).<sup>34</sup> A correlation with  
34 MVPA much lower than in our study, but significant, was reported in a Chinese population  
35 ( $\rho=0.33$ ) of children aged from 8 to 13 years old.<sup>35</sup> These data confirm a line of evidence  
36 suggesting that PA questionnaires for adolescents correlate better with scores obtained from  
37 an accelerometer than PA questionnaires for younger children.<sup>17</sup>

38  
39  
40  
41  
42  
43  
44  
45  
46  
47  
48  
49  
50  
51  
52  
53  
54  
55  
56  
57  
58  
59  
60  
61  
62  
63  
64  
65  
66  
67  
68  
69  
70  
71  
72  
73  
74  
75  
76  
77  
78  
79  
80  
81  
82  
83  
84  
85  
86  
87  
88  
89  
90  
91  
92  
93  
94  
95  
96  
97  
98  
99  
100  
101  
102  
103  
104  
105  
106  
107  
108  
109  
110  
111  
112  
113  
114  
115  
116  
117  
118  
119  
120  
121  
122  
123  
124  
125  
126  
127  
128  
129  
130  
131  
132  
133  
134  
135  
136  
137  
138  
139  
140  
141  
142  
143  
144  
145  
146  
147  
148  
149  
150  
151  
152  
153  
154  
155  
156  
157  
158  
159  
160  
161  
162  
163  
164  
165  
166  
167  
168  
169  
170  
171  
172  
173  
174  
175  
176  
177  
178  
179  
180  
181  
182  
183  
184  
185  
186  
187  
188  
189  
190  
191  
192  
193  
194  
195  
196  
197  
198  
199  
200  
201  
202  
203  
204  
205  
206  
207  
208  
209  
210  
211  
212  
213  
214  
215  
216  
217  
218  
219  
220  
221  
222  
223  
224  
225  
226  
227  
228  
229  
230  
231  
232  
233  
234  
235  
236  
237  
238  
239  
240  
241  
242  
243  
244  
245  
246  
247  
248  
249  
250  
251  
252  
253  
254  
255  
256  
257  
258  
259  
260  
261  
262  
263  
264  
265  
266  
267  
268  
269  
270  
271  
272  
273  
274  
275  
276  
277  
278  
279  
280  
281  
282  
283  
284  
285  
286  
287  
288  
289  
290  
291  
292  
293  
294  
295  
296  
297  
298  
299  
300  
301  
302  
303  
304  
305  
306  
307  
308  
309  
310  
311  
312  
313  
314  
315  
316  
317  
318  
319  
320  
321  
322  
323  
324  
325  
326  
327  
328  
329  
330  
331  
332  
333  
334  
335  
336  
337  
338  
339  
340  
341  
342  
343  
344  
345  
346  
347  
348  
349  
350  
351  
352  
353  
354  
355  
356  
357  
358  
359  
360  
361  
362  
363  
364  
365  
366  
367  
368  
369  
370  
371  
372  
373  
374  
375  
376  
377  
378  
379  
380  
381  
382  
383  
384  
385  
386  
387  
388  
389  
390  
391  
392  
393  
394  
395  
396  
397  
398  
399  
400  
401  
402  
403  
404  
405  
406  
407  
408  
409  
410  
411  
412  
413  
414  
415  
416  
417  
418  
419  
420  
421  
422  
423  
424  
425  
426  
427  
428  
429  
430  
431  
432  
433  
434  
435  
436  
437  
438  
439  
440  
441  
442  
443  
444  
445  
446  
447  
448  
449  
450  
451  
452  
453  
454  
455  
456  
457  
458  
459  
460  
461  
462  
463  
464  
465  
466  
467  
468  
469  
470  
471  
472  
473  
474  
475  
476  
477  
478  
479  
480  
481  
482  
483  
484  
485  
486  
487  
488  
489  
490  
491  
492  
493  
494  
495  
496  
497  
498  
499  
500  
501  
502  
503  
504  
505  
506  
507  
508  
509  
510  
511  
512  
513  
514  
515  
516  
517  
518  
519  
520  
521  
522  
523  
524  
525  
526  
527  
528  
529  
530  
531  
532  
533  
534  
535  
536  
537  
538  
539  
540  
541  
542  
543  
544  
545  
546  
547  
548  
549  
550  
551  
552  
553  
554  
555  
556  
557  
558  
559  
560  
561  
562  
563  
564  
565  
566  
567  
568  
569  
570  
571  
572  
573  
574  
575  
576  
577  
578  
579  
580  
581  
582  
583  
584  
585  
586  
587  
588  
589  
590  
591  
592  
593  
594  
595  
596  
597  
598  
599  
600  
601  
602  
603  
604  
605  
606  
607  
608  
609  
610  
611  
612  
613  
614  
615  
616  
617  
618  
619  
620  
621  
622  
623  
624  
625  
626  
627  
628  
629  
630  
631  
632  
633  
634  
635  
636  
637  
638  
639  
640  
641  
642  
643  
644  
645  
646  
647  
648  
649  
650  
651  
652  
653  
654  
655  
656  
657  
658  
659  
660  
661  
662  
663  
664  
665  
666  
667  
668  
669  
670  
671  
672  
673  
674  
675  
676  
677  
678  
679  
680  
681  
682  
683  
684  
685  
686  
687  
688  
689  
690  
691  
692  
693  
694  
695  
696  
697  
698  
699  
700  
701  
702  
703  
704  
705  
706  
707  
708  
709  
710  
711  
712  
713  
714  
715  
716  
717  
718  
719  
720  
721  
722  
723  
724  
725  
726  
727  
728  
729  
730  
731  
732  
733  
734  
735  
736  
737  
738  
739  
740  
741  
742  
743  
744  
745  
746  
747  
748  
749  
750  
751  
752  
753  
754  
755  
756  
757  
758  
759  
760  
761  
762  
763  
764  
765  
766  
767  
768  
769  
770  
771  
772  
773  
774  
775  
776  
777  
778  
779  
780  
781  
782  
783  
784  
785  
786  
787  
788  
789  
790  
791  
792  
793  
794  
795  
796  
797  
798  
799  
800  
801  
802  
803  
804  
805  
806  
807  
808  
809  
810  
811  
812  
813  
814  
815  
816  
817  
818  
819  
820  
821  
822  
823  
824  
825  
826  
827  
828  
829  
830  
831  
832  
833  
834  
835  
836  
837  
838  
839  
840  
841  
842  
843  
844  
845  
846  
847  
848  
849  
850  
851  
852  
853  
854  
855  
856  
857  
858  
859  
860  
861  
862  
863  
864  
865  
866  
867  
868  
869  
870  
871  
872  
873  
874  
875  
876  
877  
878  
879  
880  
881  
882  
883  
884  
885  
886  
887  
888  
889  
890  
891  
892  
893  
894  
895  
896  
897  
898  
899  
900  
901  
902  
903  
904  
905  
906  
907  
908  
909  
910  
911  
912  
913  
914  
915  
916  
917  
918  
919  
920  
921  
922  
923  
924  
925  
926  
927  
928  
929  
930  
931  
932  
933  
934  
935  
936  
937  
938  
939  
940  
941  
942  
943  
944  
945  
946  
947  
948  
949  
950  
951  
952  
953  
954  
955  
956  
957  
958  
959  
960  
961  
962  
963  
964  
965  
966  
967  
968  
969  
970  
971  
972  
973  
974  
975  
976  
977  
978  
979  
980  
981  
982  
983  
984  
985  
986  
987  
988  
989  
990  
991  
992  
993  
994  
995  
996  
997  
998  
999  
1000

1  
2  
3 questionnaires. Results from a systematic review of 57 studies that examined the correlation  
4 of questionnaire-derived PA measures with accelerometry-derived PA measures, indicate that  
5 overall correlations for total PA range from  $\rho=0.14$  to  $\rho=0.58$ . Of the reviewed studies,  
6 only one third report correlations equal to or higher than 0.40.<sup>14</sup>  
7  
8  
9

10 Among the available validated self-report measures of PA dedicated to youth, one of  
11 the most promising tools may be PAQ-A.<sup>9</sup> The PAQ-A is an easy to use and a quick to  
12 administer self-report tool. The strength of the PAQ-A is that it determines a general PA level  
13 for a whole week rather than trying to estimate overall frequency, intensity and duration with  
14 detailed questions. The PAQ-A also provides specific information about activity levels during  
15 different periods of the day (e.g. recess, physical education, after school etc.).<sup>18</sup>  
16  
17  
18  
19

20 Excellent intra-class correlation and internal consistency, as well as very strong  
21 convergent validity with accelerometer-based measures have provided evidence that the PAQ-  
22 A can be a useful tool for large PA assessment studies with Polish adolescents.  
23  
24  
25

## 26 27 **Limitations**

28  
29  
30 Potential limitations of this study need to be taken into account when interpreting the  
31 results. The PAQ-A is appropriate for high school students between approximately 14-20  
32 years of age who are currently in the school system. However, the age range of participants  
33 recruited in the current study was 14-19 years. The difference in age range is due to the  
34 education system in Poland, in which students finish high school at the age of 19. The  
35 relatively small sample size can also be considered as a limitation, however, the sample size  
36 was similar to the original validation studies.<sup>19</sup> Another limitation in our study is the missing  
37 of a sleeping diary, the relatively high dropout rate of participants due to accelerometer non-  
38 wear periods and a lack of data on their age, sex, BMI and PA level.  
39  
40  
41  
42  
43  
44  
45  
46  
47

## 48 **Conclusion**

49 This is the first study that analyses the validity and reliability of PAQ-A in Polish  
50 adolescents which may help to assess the applicability of the questionnaire. Our results show  
51 that the Polish version of PAQ-A provides reliable and valid estimates of PA among 14 to 19-  
52 year-old adolescents. The Polish version of PAQ-A can be considered as very useful in  
53 clinical practice and epidemiological studies to assess overall levels of PA in adolescents.  
54  
55  
56  
57  
58  
59  
60

## References

1. Caspersen CJ, Powell KE, Christenson GM. Physical activity, exercise, and physical fitness: definitions and distinctions for health-related research. *Public Health Rep* 1985;**100**:126–31.
2. Lee IM, Shiroma EJ, Lobelo F, Puska P, Blair SN, Katzmarzyk PT. Effect of physical inactivity on major non-communicable diseases worldwide: an analysis of burden of disease and life expectancy. *Lancet* 2012;**9838**:219–29.
3. World Health Organization. Prevalence of insufficient physical activity. [http://www.who.int/gho/ncd/risk\\_factors/physical\\_activity/en/](http://www.who.int/gho/ncd/risk_factors/physical_activity/en/) (accessed on July 9, 2019).
4. Ng M, Fleming T, Robinson M, *et al.* Global, regional, and national prevalence of overweight and obesity in children and adults during 1980–2013: a systematic analysis for the Global Burden of Disease Study 2013. *Lancet* 2014;**9945**: 766–81.
5. World Health Organization. Obesity and overweight. <https://www.who.int/news-room/fact-sheets/detail/obesity-and-overweight> (accessed on July 9, 2019).
6. Daniels SR, Jacobson MS, McCrindle BW, *et al.* American Heart Association Childhood Obesity Research Summit: executive summary. *Circulation* 2009;**119**:2114-23.
7. Donnelly JE, Hillman CH, Castelli D, *et al.* Physical activity, fitness, cognitive function, and academic achievement in children: a systematic review. *Med Sci Sports Exerc* 2016;**48**:1197–222.
8. Sylvia LG, Bernstein EE, Hubbard JL, *et al.* Practical guide to measuring physical activity. *J Acad Nutr Diet* 2013;**114**:199-208.
9. Biddle SJ, Gorely T, Pearson N, *et al.* An assessment of self-reported physical activity instruments in young people for population surveillance: Project ALPHA. *Int J Behav Nutr Phys Act* 2011;**8**:1.
10. Sallis JF, Saelens BE. Assessment of physical activity by self-report: status, limitations, and future directions. *Res Q Exerc Sport* 2000;**71**:S1-14.
11. Westerterp KR. Assessment of physical activity: a critical appraisal. *Eur J Appl Physiol* 2009;**105**:823-8.
12. Pate RR, Almeida MJ, McIver KL, Pfeiffer KA, Dowda M. Validation and calibration of an accelerometer in preschool children. *Obesity (Silver Spring)* 2006;**14**:2000-6.

13. Sallis JF. Measuring physical activity: practical approaches for program evaluation in Native American communities. *J Public Health Manag Pract* 2010;**16**:404–10.
14. Skender S, Ose J, Chang-Claude J, *et al*. Accelerometry and physical activity questionnaires - a systematic review. *BMC Public Health* 2016;**16**:515.
15. Helmerhorst HJ, Brage S, Warren J, Besson H, Ekelund U. A systematic review of reliability and objective criterion-related validity of physical activity questionnaires. *Int J Behav Nutr Phys Act* 2012;**9**:103.
16. van Poppel MN, Chinapaw MJ, Mokkink LB, van Mechelen W, Terwee CB. Physical activity questionnaires for adults: a systematic review of measurement properties. *Sports Med* 2010;**40**:565–600.
17. Chinapaw MJM, Mokkink LB, van PoppelMNM, *et al*. Physical Activity Questionnaires for youth. A systematic review of measurement properties. *Sports Med* 2010;**40**:539-63.
18. Kowalski KC, Crocker PRE, Donen RM. The Physical Activity Questionnaire for Older Children (PAQ-C) and Adolescents (PAQ-A) Manual. Canada: College of Kinesiology, University of Saskatchewan; 2004:1–38.
19. Kowalski KC, Crocker PRE, Kowalski NP. Convergent validity of the Physical Activity Questionnaire for Adolescents. *Pediatr Exerc Sci* 1997;**9**:342–52.
20. Janz KF, Lutuchy EM, Wenthe P, *et al*. Measuring activity in children and adolescents using self-report: PAQ-C and PAQ-A. *Med Sci Sports Exerc* 2008;**40**:767–72.
21. Geisinger KF. Cross-cultural normative assessment: translation and adaptation issues influencing the normative interpretation of assessment instruments. *Psychol Assess* 1994;**6**:304-12.
22. Kułaga Z, Rózdżyńska A, Palczewska I. Percentile charts of height, body mass and body mass index in children and adolescents in Poland – results of the OLAF study. *Stand Med* 2010;**7**:690–700.
23. Barlow SE, Expert Committee. Expert committee recommendations regarding the prevention, assessment, and treatment of child and adolescent overweight and obesity: summary report. *Pediatrics* 2007;**120**:S164–92.
24. Lee IM, Shiroma EJ. Using accelerometers to measure physical activity in large-scale epidemiological studies: issues and challenges. *Br J Sports Med* 2013;**48**:197-201.
25. Sasaki JE, John D, Freedson PS. Validation and comparison of ActiGraph activity monitors. *J Sci Med Sport* 2011;**14**:411-6.

- 1
  - 2
  - 3
  - 4
  - 5
  - 6
  - 7
  - 8
  - 9
  - 10
  - 11
  - 12
  - 13
  - 14
  - 15
  - 16
  - 17
  - 18
  - 19
  - 20
  - 21
  - 22
  - 23
  - 24
  - 25
  - 26
  - 27
  - 28
  - 29
  - 30
  - 31
  - 32
  - 33
  - 34
  - 35
  - 36
  - 37
  - 38
  - 39
  - 40
  - 41
  - 42
  - 43
  - 44
  - 45
  - 46
  - 47
  - 48
  - 49
  - 50
  - 51
  - 52
  - 53
  - 54
  - 55
  - 56
  - 57
  - 58
  - 59
  - 60
26. Santos-Lozano A, Santin-Medeiros F, Cardon G, *et al.* Actigraph GT3X: validation and determination of physical activity intensity cut points. *Int J Sports Med* 2013;**34**:975-82.
27. Puyau MR, Adolph AL, Vohra FA, Butte NF. Validation and calibration of physical activity monitors in children. *Obes Res* 2002;**10**:150-7.
28. Troiano RP, Berrigan D, Dodd KW, *et al.* Physical activity in the United States measured by accelerometer. *Med Sci Sports Exerc* 2008;**40**:181-8.
29. Evenson KR, Catellier DJ, Gill K, Ondrak KS, McMurray RG. Calibration of two objective measures of physical activity for children. *J Sports Sci* 2008;**26**:1557-65.
30. Bartko JJ. The intraclass correlation coefficient as a measure of reliability. *Psychol Rep* 1966;**19**:3-11.
31. Koo TK, Li MY. A Guideline of Selecting and Reporting Intraclass Correlation Coefficients for Reliability Research. *J Chiropr Med* 2016;**15**:155-63.
32. Cronbach LJ. Coefficient alpha and the internal structure of tests. *Psychometrika* 1951;**16**:297-334.
33. Chan YH. Biostatistics 104: correlational analysis. *Singap Med J* 2003;**44**:614-19.
34. Martinez-Gomez D, Martinez-de-Haro V, Pozo T, *et al.* Reliability and validity of the PAQ-A questionnaire to assess physical activity in Spanish adolescents. *Rev Esp Salud Publica* 2009;**83**:427-39.
35. Wang JJ, Baranowski T, Lau WP, *et al.* Validation of the Physical Activity Questionnaire for Older Children (PAQ-C) among Chinese Children. *Biomed Environ Sci* 2016;**29**:177-86.
36. Lachat CK1, Verstraeten R, Khanh le NB, *et al.* Validity of two physical activity questionnaires (IPAQ and PAQA) for Vietnamese adolescents in rural and urban areas. *Int J Behav Nutr Phys Act* 2008;**5**:37.
37. Voss C, Dean PH, Gardner RF, *et al.* Validity and reliability of the Physical Activity Questionnaire for Children (PAQ-C) and Adolescents (PAQ-A) in individuals with congenital heart disease. *PLoS One* 2017;**12**:e0175806.
38. Aggio D, Fairclough S, Knowles Z, *et al.* Validity and reliability of a modified english version of the physical activity questionnaire for adolescents. *Arch Public Health* 2016;**74**:3.
39. Bervoets L, Van Noten C, Van Roosbroeck S, *et al.* Reliability and Validity of the Dutch Physical Activity Questionnaires for Children (PAQ-C) and Adolescents (PAQ-A). *Arch Public Health* 2014;**72**:47.



- 1  
2  
3 40. Vanhelst J, Hardy L, Gottrand F, *et al.* Technical aspects and relevance of physical  
4 activity assessment in children and adolescents in free-living conditions. *Arch Pediatr*  
5 2012;**19**:1219-25.  
6  
7  
8  
9

### 10 **Acknowledgement**

11 We are grateful to the participants and their families who volunteered their time to participate  
12 in this research.  
13  
14  
15

### 16 **Authors' contributions**

17 JW - development of the concept of research. JW, JBP, KD, JB, PM, JH – data compilation.  
18 KP, AM, JW, PM - analysis and interpretation of data. KP - statistical analysis. JW writing an  
19 manuscript. JPB, JB, KD - substantive review article. AM, PM - overseeing the final article.  
20 All authors read and approved the final version of the manuscript.  
21  
22  
23  
24  
25  
26  
27

### 28 **Funding**

29 This research received no specific grant from any funding agency in the public, commercial or  
30 not-for-profit sectors.  
31  
32  
33

### 34 **Conflicts of interest**

35 The authors declare no conflict of interest.  
36  
37

### 38 **Data sharing statement**

39 The datasets generated and/or analysed during the current study are not publicly available due  
40 to protect student privacy, but are available from the corresponding author on reasonable  
41 request.  
42  
43  
44  
45  
46

47 **Supplementary file no 1.** Polish version of Physical Activity Questionnaire for Adolescents  
48 (PAQ-A)  
49  
50  
51  
52  
53  
54  
55  
56  
57  
58  
59  
60

## Kwestionariusz Aktywności Fizycznej dla Młodzieży

### Polish version of the Physical Activity Questionnaire for Adolescents (PAQ-A)

Imię i nazwisko: \_\_\_\_\_

Wiek: \_\_\_\_\_

Płeć: K \_\_\_\_\_ M \_\_\_\_\_

Klasa: \_\_\_\_\_

Podajemy próbę oceny poziomu Twojej aktywności fizycznej w *ostatnich 7 dniach* (w ciągu ostatniego tygodnia). Odnosi się to do aktywności, które powodują, że się pocisz lub jesteś zmęczony/a, albo do zabaw, które sprawiają, że oddychasz z wysiłkiem, takich jak: podskakiwanie, bieganie, wspinanie się itp.

#### Pamiętaj:

- Nie ma złych lub dobrych odpowiedzi - to nie jest sprawdzian.

- Proszę, odpowiedz na wszystkie pytania tak szczerze i dokładnie jak potrafisz - to bardzo ważne.

#### 1. Aktywność fizyczna w Twoim wolnym czasie:

Czy wykonywałeś/aś którekolwiek z następujących czynności w ciągu *ostatnich 7 dni* (ostatniego tygodnia)? Jeśli tak, ile razy w tygodniu? (Zaznacz tylko jedno kółko w rzędzie).

|                            | 0                     | 1-2                   | 3-4                   | 5-6                   | 7 lub więcej<br>razy  |
|----------------------------|-----------------------|-----------------------|-----------------------|-----------------------|-----------------------|
| Skakanie na skakance       | <input type="radio"/> |
| Wiosłowanie/kajakowanie    | <input type="radio"/> |
| Jazda na rolkach           | <input type="radio"/> |
| Zabawa w berka             | <input type="radio"/> |
| Maszerowanie dla sportu    | <input type="radio"/> |
| Jazda na rowerze           | <input type="radio"/> |
| Jogging/bieganie           | <input type="radio"/> |
| Aerobik                    | <input type="radio"/> |
| Pływanie                   | <input type="radio"/> |
| Gra w palanta/baseball     | <input type="radio"/> |
| Taniec                     | <input type="radio"/> |
| Rugby/football amerykański | <input type="radio"/> |
| Badminton                  | <input type="radio"/> |
| Jazda na deskorolce        | <input type="radio"/> |
| Piłka nożna                | <input type="radio"/> |
| Hokej na ulicy             | <input type="radio"/> |
| Piłka siatkowa             | <input type="radio"/> |
| Unihokej                   | <input type="radio"/> |
| Piłka koszykowa            | <input type="radio"/> |
| Jazda na łyżwach           | <input type="radio"/> |
| Narciarstwo biegowe        | <input type="radio"/> |
| Hokej na lodzie            | <input type="radio"/> |
| Podnoszenie ciężarów       | <input type="radio"/> |
| Gimnastyka                 | <input type="radio"/> |
| Piłka ręczna               | <input type="radio"/> |
| Jazda na nartach           | <input type="radio"/> |
| Tenis ziemny               | <input type="radio"/> |
| Tenis stołowy              | <input type="radio"/> |
| Sporty/sztuki walki        | <input type="radio"/> |
| Jazda konna                | <input type="radio"/> |
| Inne:                      |                       |                       |                       |                       |                       |
| _____                      | <input type="radio"/> |
| _____                      | <input type="radio"/> |



2. Jak często w ciągu ostatnich 7 dni, w trakcie *lekcji wychowania fizycznego (WF)* byłeś/aś bardzo aktywny/a (intensywne granie, bieganie, skakanie, rzucanie)?

(Zaznacz tylko jedną odpowiedź).

- 1  
2  
3  
4 Nie brałem udziału w lekcji WF ..... O  
5 Prawie nigdy ..... O  
6 Czasami ..... O  
7 Dosyć często ..... O  
8 Zawsze ..... O  
9  
10  
11  
12

3. Co zazwyczaj robiłeś/aś w czasie przerwy obiadowej w ciągu ostatnich 7 dni oprócz spożywania posiłku? (Zaznacz tylko jedną odpowiedź).

- 13  
14  
15  
16 Siedziałem/am (rozmawiając, czytając, odrabiając zadania domowe) ... O  
17 Stałem/am lub spacerowałem/am ..... O  
18 Trochę biegałem/am lub grałem/am ..... O  
19 Biegałem/am lub grałem/am dość dużo ..... O  
20 Biegałem/am lub grałem/am intensywnie przez większość czasu ..... O  
21  
22  
23  
24

4. W ciągu ostatnich 7 dni, przez ile dni zaraz po szkole uprawiałeś/aś jakiś sport, trenowałeś/aś taniec, lub grałeś/aś w gry, podczas których byłeś/aś bardzo aktywny/a? (Zaznacz tylko jedną odpowiedź).

- 25  
26  
27  
28  
29  
30 W żaden dzień ..... O  
31 1 raz w tygodniu ..... O  
32 2 lub 3 razy w tygodniu ..... O  
33 4 razy w tygodniu ..... O  
34 5 razy w tygodniu ..... O  
35  
36  
37  
38

5. W ciągu ostatnich 7 dni, przez ile dni wieczorami uprawiałeś/aś jakiś sport, trenowałeś/aś taniec lub grałeś/aś w gry, podczas których byłeś/aś bardzo aktywny/a? (Zaznacz tylko jedną odpowiedź).

- 39  
40  
41  
42  
43 W żaden dzień ..... O  
44 1 raz w tygodniu ..... O  
45 2 lub 3 razy w tygodniu ..... O  
46 4 lub 5 razy w tygodniu ..... O  
47 6 lub 7 razy w tygodniu ..... O  
48  
49  
50  
51

6. Podczas ostatniego weekendu, ile razy uprawiałeś/aś jakiś sport, tańczyłeś/aś lub grałeś/aś w gry, podczas których byłeś/aś bardzo aktywny/a? (Zaznacz tylko jedną odpowiedź).

- 52  
53  
54  
55  
56  
57 Ani razu ..... O  
58 1 raz ..... O  
59 2 lub 3 razy ..... O  
60 4 lub 5 razy ..... O  
6 lub więcej razy ..... O

7. Które z następujących pięciu stwierdzeń najlepiej opisują Ciebie w ciągu ostatnich 7 dni? Przeczytaj *wszystkie pięć* stwierdzeń zanim zaznaczysz *jedną* odpowiedź odnoszącą się do Ciebie. (Zaznacz tylko jedną odpowiedź).

Cały lub większość czasu spędzałem/am wykonując rzeczy, które wymagały bardzo mało wysiłku fizycznego

Czasami (1-2 razy w zeszłym tygodniu) byłem/am aktywny/a fizycznie w wolnym czasie (np. uprawiałem/am jakiś sport, biegałem/am, jeździłem/am rowerem, pływałem/am, ćwiczyłem/am aerobik)

Często (3-4 razy w zeszłym tygodniu) byłem/am aktywny/a fizycznie w wolnym czasie

Dosyć często (5-6 razy w zeszłym tygodniu) byłem/am aktywny/a fizycznie w wolnym czasie

Bardzo często (7 lub więcej razy w zeszłym tygodniu) byłem/am aktywny/a fizycznie w wolnym czasie

8. Zaznacz jak często byłeś/aś aktywny/a fizycznie każdego dnia w ciągu ostatniego tygodnia (np. uprawiając jakiś sport, uczestnicząc w grach ruchowych, tańcząc lub wykonując inne formy aktywności fizycznej).

|              | Wcale                 | Trochę                | Średnio               | Często                | Bardzo często         |
|--------------|-----------------------|-----------------------|-----------------------|-----------------------|-----------------------|
| Poniedziałek | <input type="radio"/> |
| Wtorek       | <input type="radio"/> |
| Środa        | <input type="radio"/> |
| Czwartek     | <input type="radio"/> |
| Piątek       | <input type="radio"/> |
| Sobota       | <input type="radio"/> |
| Niedziela    | <input type="radio"/> |

9. Czy byłeś/aś chory/a w ciągu ostatniego tygodnia lub zdarzyło się coś, co powstrzymało Cię przed zwykle wykonywaną aktywnością fizyczną? (Zaznacz jedną opcję).

Tak .....

Nie .....

Jeśli tak, to co uniemożliwiło Ci podjęcie tej aktywności? \_\_\_\_\_

**STROBE 2007 (v4) checklist of items to be included in reports of observational studies in epidemiology\***  
**Checklist for cohort, case-control, and cross-sectional studies (combined)**

| Section/Topic             | Item # | Recommendation                                                                                                                                                                                                                                                                                                                                                                                                                                                         | Reported on page # |
|---------------------------|--------|------------------------------------------------------------------------------------------------------------------------------------------------------------------------------------------------------------------------------------------------------------------------------------------------------------------------------------------------------------------------------------------------------------------------------------------------------------------------|--------------------|
| Title and abstract        | 1      | (a) Indicate the study's design with a commonly used term in the title or the abstract                                                                                                                                                                                                                                                                                                                                                                                 | 1, 2               |
|                           |        | (b) Provide in the abstract an informative and balanced summary of what was done and what was found                                                                                                                                                                                                                                                                                                                                                                    | 2                  |
| <b>Introduction</b>       |        |                                                                                                                                                                                                                                                                                                                                                                                                                                                                        |                    |
| Background/rationale      | 2      | Explain the scientific background and rationale for the investigation being reported                                                                                                                                                                                                                                                                                                                                                                                   | 3, 4               |
| Objectives                | 3      | State specific objectives, including any pre-specified hypotheses                                                                                                                                                                                                                                                                                                                                                                                                      | 4                  |
| <b>Methods</b>            |        |                                                                                                                                                                                                                                                                                                                                                                                                                                                                        |                    |
| Study design              | 4      | Present key elements of study design early in the paper                                                                                                                                                                                                                                                                                                                                                                                                                | 4,7                |
| Setting                   | 5      | Describe the setting, locations, and relevant dates, including periods of recruitment, exposure, follow-up, and data collection                                                                                                                                                                                                                                                                                                                                        | 4,5,6,7            |
| Participants              | 6      | (a) <i>Cohort study</i> —Give the eligibility criteria, and the sources and methods of selection of participants. Describe methods of follow-up<br><i>Case-control study</i> —Give the eligibility criteria, and the sources and methods of case ascertainment and control selection. Give the rationale for the choice of cases and controls<br><i>Cross-sectional study</i> —Give the eligibility criteria, and the sources and methods of selection of participants | 5,6                |
|                           |        | (b) <i>Cohort study</i> —For matched studies, give matching criteria and number of exposed and unexposed<br><i>Case-control study</i> —For matched studies, give matching criteria and the number of controls per case                                                                                                                                                                                                                                                 |                    |
| Variables                 | 7      | Clearly define all outcomes, exposures, predictors, potential confounders, and effect modifiers. Give diagnostic criteria, if applicable                                                                                                                                                                                                                                                                                                                               | 6                  |
| Data sources/ measurement | 8*     | For each variable of interest, give sources of data and details of methods of assessment (measurement). Describe comparability of assessment methods if there is more than one group                                                                                                                                                                                                                                                                                   | 4, 5, 6,7          |
| Bias                      | 9      | Describe any efforts to address potential sources of bias                                                                                                                                                                                                                                                                                                                                                                                                              |                    |
| Study size                | 10     | Explain how the study size was arrived at                                                                                                                                                                                                                                                                                                                                                                                                                              | 4,5,6              |
| Quantitative variables    | 11     | Explain how quantitative variables were handled in the analyses. If applicable, describe which groupings were chosen and why                                                                                                                                                                                                                                                                                                                                           | 4                  |
| Statistical methods       | 12     | (a) Describe all statistical methods, including those used to control for confounding                                                                                                                                                                                                                                                                                                                                                                                  | 7                  |
|                           |        | (b) Describe any methods used to examine subgroups and interactions                                                                                                                                                                                                                                                                                                                                                                                                    | 7                  |
|                           |        | (c) Explain how missing data were addressed                                                                                                                                                                                                                                                                                                                                                                                                                            |                    |
|                           |        | (d) <i>Cohort study</i> —If applicable, explain how loss to follow-up was addressed<br><i>Case-control study</i> —If applicable, explain how matching of cases and controls was addressed                                                                                                                                                                                                                                                                              |                    |

|                          |     |                                                                                                                                                                                                              |          |
|--------------------------|-----|--------------------------------------------------------------------------------------------------------------------------------------------------------------------------------------------------------------|----------|
|                          |     | <i>Cross-sectional study</i> —If applicable, describe analytical methods taking account of sampling strategy                                                                                                 |          |
|                          |     | (e) Describe any sensitivity analyses                                                                                                                                                                        | 7        |
| <b>Results</b>           |     |                                                                                                                                                                                                              |          |
| Participants             | 13* | (a) Report numbers of individuals at each stage of study—eg numbers potentially eligible, examined for eligibility, confirmed eligible, included in the study, completing follow-up, and analysed            | 5,6      |
|                          |     | (b) Give reasons for non-participation at each stage                                                                                                                                                         | 5,6      |
|                          |     | (c) Consider use of a flow diagram                                                                                                                                                                           |          |
| Descriptive data         | 14* | (a) Give characteristics of study participants (eg demographic, clinical, social) and information on exposures and potential confounders                                                                     | 7,8      |
|                          |     | (b) Indicate number of participants with missing data for each variable of interest                                                                                                                          |          |
|                          |     | (c) <i>Cohort study</i> —Summarise follow-up time (eg, average and total amount)                                                                                                                             |          |
| Outcome data             | 15* | <i>Cohort study</i> —Report numbers of outcome events or summary measures over time                                                                                                                          |          |
|                          |     | <i>Case-control study</i> —Report numbers in each exposure category, or summary measures of exposure                                                                                                         |          |
|                          |     | <i>Cross-sectional study</i> —Report numbers of outcome events or summary measures                                                                                                                           | 7-10     |
| Main results             | 16  | (a) Give unadjusted estimates and, if applicable, confounder-adjusted estimates and their precision (eg, 95% confidence interval). Make clear which confounders were adjusted for and why they were included |          |
|                          |     | (b) Report category boundaries when continuous variables were categorized                                                                                                                                    |          |
|                          |     | (c) If relevant, consider translating estimates of relative risk into absolute risk for a meaningful time period                                                                                             |          |
| Other analyses           | 17  | Report other analyses done—eg analyses of subgroups and interactions, and sensitivity analyses                                                                                                               |          |
| <b>Discussion</b>        |     |                                                                                                                                                                                                              |          |
| Key results              | 18  | Summarise key results with reference to study objectives                                                                                                                                                     | 10       |
| Limitations              | 19  | Discuss limitations of the study, taking into account sources of potential bias or imprecision. Discuss both direction and magnitude of any potential bias                                                   | 12       |
| Interpretation           | 20  | Give a cautious overall interpretation of results considering objectives, limitations, multiplicity of analyses, results from similar studies, and other relevant evidence                                   | 10,11,12 |
| Generalisability         | 21  | Discuss the generalisability (external validity) of the study results                                                                                                                                        | 12       |
| <b>Other information</b> |     |                                                                                                                                                                                                              |          |
| Funding                  | 22  | Give the source of funding and the role of the funders for the present study and, if applicable, for the original study on which the present article is based                                                | 16       |

\*Give information separately for cases and controls in case-control studies and, if applicable, for exposed and unexposed groups in cohort and cross-sectional studies.

**Note:** An Explanation and Elaboration article discusses each checklist item and gives methodological background and published examples of transparent reporting. The STROBE checklist is best used in conjunction with this article (freely available on the Web sites of PLoS Medicine at <http://www.plosmedicine.org/>, Annals of Internal Medicine at <http://www.annals.org/>, and Epidemiology at <http://www.epidem.com/>). Information on the STROBE Initiative is available at [www.strobe-statement.org](http://www.strobe-statement.org).

# BMJ Open

## Adaptation and validation of the Physical Activity Questionnaire for Adolescents (PAQ-A) among Polish adolescents – cross-sectional study

|                                 |                                                                                                                                                                                                                                                                                                                                                                                                                                                                                                        |
|---------------------------------|--------------------------------------------------------------------------------------------------------------------------------------------------------------------------------------------------------------------------------------------------------------------------------------------------------------------------------------------------------------------------------------------------------------------------------------------------------------------------------------------------------|
| Journal:                        | <i>BMJ Open</i>                                                                                                                                                                                                                                                                                                                                                                                                                                                                                        |
| Manuscript ID                   | bmjopen-2019-030567.R2                                                                                                                                                                                                                                                                                                                                                                                                                                                                                 |
| Article Type:                   | Original research                                                                                                                                                                                                                                                                                                                                                                                                                                                                                      |
| Date Submitted by the Author:   | 29-Aug-2019                                                                                                                                                                                                                                                                                                                                                                                                                                                                                            |
| Complete List of Authors:       | Wyszyńska, Justyna; Rzeszow University<br>Matłosz, Piotr; Rzeszow University, Faculty of Physical Education<br>Podgórska-Bednarz, Justyna; Rzeszow University, Medical Faculty<br>Herbert, Jarosław; Rzeszow University, Faculty of Physical Education<br>Przednowek, Krzysztof; Rzeszow University, Faculty of Physical Education<br>Baran, Joanna; Rzeszow University, Medical Faculty<br>Dereń, Katarzyna; Rzeszow University, Medical Faculty<br>Mazur, Artur; Rzeszow University, Medical Faculty |
| <b>Primary Subject Heading</b>: | Public health                                                                                                                                                                                                                                                                                                                                                                                                                                                                                          |
| Secondary Subject Heading:      | Sports and exercise medicine                                                                                                                                                                                                                                                                                                                                                                                                                                                                           |
| Keywords:                       | adolescent, physical activity, validation                                                                                                                                                                                                                                                                                                                                                                                                                                                              |
|                                 |                                                                                                                                                                                                                                                                                                                                                                                                                                                                                                        |

SCHOLARONE™  
Manuscripts

1  
2  
3 **Adaptation and validation of the Physical Activity Questionnaire for Adolescents**  
4 **(PAQ-A) among Polish adolescents – cross-sectional study**  
5

6  
7 Justyna Wyszyńska<sup>1</sup>, Piotr Matłosz<sup>2</sup>, Justyna Podgórska-Bednarz<sup>1</sup>, Jarosław Herbert<sup>2</sup>,  
8 Krzysztof Przednowek<sup>2</sup>, Joanna Baran<sup>1</sup>, Katarzyna Dereń<sup>1</sup>, Artur Mazur<sup>1</sup>  
9

- 10  
11 1. Medical Faculty, University of Rzeszów, Poland  
12 2. Faculty of Physical Education, University of Rzeszów, Poland  
13  
14  
15  
16  
17

18 **Corresponding Author**  
19

20 Justyna Wyszyńska, Ph.D.  
21

22 Email address: [justyna.wyszynska@onet.pl](mailto:justyna.wyszynska@onet.pl)  
23

24 Institute of Physiotherapy, Medical Faculty, University of Rzeszów  
25

26 Ul. Kopisto 2a  
27

28 35-959, Rzeszów, Poland  
29

30 ORCID: 0000-0002-5786-6214  
31  
32  
33  
34

35 **Word count: 3501**  
36  
37  
38  
39  
40  
41  
42  
43  
44  
45  
46  
47  
48  
49  
50  
51  
52  
53  
54  
55  
56  
57  
58  
59  
60

## Abstract

*Objective.* The lack of a widely accepted questionnaire used to assess the physical activity of adolescents in the Polish language creates a need to introduce such a valid, reliable, inexpensive and quick tool for assessment. This study was designed to culturally adapt and validate the Physical Activity Questionnaires for Adolescents (PAQ-A) in the Polish language.

*Design.* Cross-sectional study.

*Participants and outcome measures.* Cultural adaptation of the Polish version of the PAQ-A was performed following the standardized questionnaires cultural adaptation process. In a sample of 78 adolescents aged 14 to 19 years, the PAQ-A test-retest was administered within a 1-week interval. Reliability was analysed by the Intraclass Correlation Coefficient (ICC) and internal consistency with Cronbach's  $\alpha$ . Participants completed the PAQ-A, and wore an accelerometer for 7 consecutive days. The PAQ-A was compared to physical activity parameters obtained using the accelerometer.

*Results.* Test-retest reliability showed ICC=0.97 for the total score of PAQ-A. Internal consistency was excellent ( $\alpha=0.93$ ). The PAQ-A was very strongly correlated with steps per day ( $\rho=0.94$ ) and with moderate-to-vigorous physical activity ( $\rho=0.81$ ) assessed by the accelerometer.

*Conclusions.* The Polish version of the PAQ-A is a valuable tool to estimate general levels of physical activity among adolescents from 14-19 years old.

*Keywords.* adaptation, adolescents, physical activity, validation

## Strengths and limitations of this study

- This study provides the first Physical Activity Questionnaire for Adolescents cultural adaptation and validation study among Polish adolescents aged 14-19 years.
- The Polish version of the Physical Activity Questionnaire for Adolescents was compared with a device-based measure of physical activity (triaxial accelerometry) to determine the validity of the questionnaire.
- In this study, we used international standards for validating the questionnaire.
- Limitations of this study are the small sample size and the relatively high dropout rate of participants due to accelerometer non-wear periods.



## Introduction

One of the most important factors determining human health is physical activity (PA), which is defined as body movement resulting from skeletal muscle contraction during which energy expenditure is increased.<sup>1</sup> Physical inactivity is responsible for about 3.2 million deaths per year, being one of the most important risk factors for non-communicable diseases such as coronary heart disease, type 2 diabetes, and cancer.<sup>2</sup> According to the World Health Organization, more than 80% of the world's adolescent population is insufficiently physically active.<sup>3</sup> Increasing evidence suggests that declining PA is a major factor for higher prevalence of childhood obesity.<sup>4</sup> Worldwide, over 340 million children and adolescents aged 5-19 were overweight or obese in 2016.<sup>5</sup> Physical activity is not only an important factor in the prevention of chronic diseases such as obesity, hypertension and cardiovascular diseases<sup>6</sup>; there is also evidence that regular participation in PA has a positive impact on psychosocial wellbeing, cognitive outcomes, and mental health.<sup>7</sup> Accurate measurement of PA is important to understanding the association between PA and health, but also to monitor changes in PA patterns, and to evaluate the effectiveness of interventions.

To assess PA level, valid and reliable measures are required. The doubly labeled water method is the most widely accepted technique and the gold standard for assessing total energy expenditure, however, it is not often used for research studies as it is expensive, time-intensive, and cannot capture qualitative data.<sup>8</sup> Self-report questionnaires, despite their limitations, are often used due to their low cost and ease of administration, ability to measure large samples and to contextualise PA.<sup>9</sup> Weaknesses of self-report questionnaires include, among others inaccuracies, the tendency to over-report PA levels, inability to use with young children (below the age of 10 or 11), and inability to compare results across studies due to the large number of measures available.<sup>10,11</sup> A more accurate estimate of PA is provided by device-based measures (such as accelerometers, pedometers, heart-rate monitors).<sup>11</sup> An advantage of accelerometers include minute-by-minute monitoring, capturing intensity level, large memory capacities,<sup>8</sup> and feasibility with young children.<sup>12</sup> However, accelerometers do not provide information on both the type and context of PA. Moreover, accelerometers are expensive and require technical expertise, specialized hardware, software, and individual programming.<sup>13</sup> Results of a systematic review that compared PA measures from accelerometers with PA scores of questionnaires, indicated that correlations between questionnaires and accelerometry were weak to moderate.<sup>14</sup> This finding is in agreement with previous reviews.<sup>15,16</sup>

1  
2  
3 A systematic review by Chinapaw et al. that examined 61 versions of PA questionnaires  
4 for youth found that none of the questionnaires included in the review had acceptable levels of  
5 reliability and validity according to guidelines described in the Qualitative Attributes and  
6 Measurement Properties of Physical Activity Questionnaires.<sup>17</sup> Biddle et al. also reviewed  
7 available self-report PA instruments developed for children and adolescents to assess their  
8 suitability and feasibility for use in population surveillance systems and tracking trends over  
9 time, particularly in Europe. The authors identified 20 activity-based measures, of which three  
10 were supported by the majority of the expert group: the Physical Activity Questionnaire for  
11 Older Children (PAQ-C) and the Physical Activity Questionnaire for Adolescents (PAQ-A),  
12 Youth Risk Behaviour Surveillance Survey, and the Teen Health Survey. These PA  
13 measurement instruments demonstrated both reliability and validity but also ease of use.<sup>9</sup>

14  
15  
16  
17  
18  
19  
20  
21  
22  
23 The PAQ-A was developed in Canada by Kowalski et al.<sup>18</sup> Research results by Kowalski  
24 and others indicate that PAQ-A is a reliable, inexpensive, easy and quick tool used to assess  
25 PA in adolescents.<sup>18-20</sup> Cultural adaptation and validation of this questionnaire has not yet  
26 been assessed in Poland. The adaptation of a tool to assess the PA of adolescents in Poland  
27 will allow not only for easy and quick large-scale research, but will also enable result  
28 comparison among countries.

29  
30  
31  
32  
33  
34 The main aim of this study was to assess the reliability and validity of a Polish version of  
35 the PAQ-A in adolescents.

## 36 37 38 **Methods**

### 39 40 41 *Study design and setting*

42  
43 A cross-sectional survey was conducted at 4 randomly selected middle and high  
44 schools in south-eastern Poland. Six classes were randomly selected from the schools  
45 representing students ranging from 14 to 19 years of age.

### 46 47 48 49 *The PAQ-A*

50  
51 The PAQ-A is an 8-item, 7-day PA recall that assesses participation in various types  
52 of PA including activity during physical education, lunch break, after school, during evenings  
53 and weekends. A 9th item not used in the calculation of the activity score asks adolescents if  
54 they were sick or otherwise prevented from engaging in regular PA. The PAQ-A was  
55 originally designed for adolescents aged 14 to 20. The questionnaire can be used to assess the  
56 level of PA during the school year, but not during holidays. Each item is scored according to a  
57  
58  
59  
60

1  
2  
3 five-point scale (1-5), with "1" indicating low and "5" a high level of PA. The end result is the  
4 average value of the points obtained, with higher scores corresponding to a higher level of  
5 PA.<sup>18</sup>  
6  
7  
8  
9

### 10 ***Translation and cultural adaptation of the Polish PAQ-A***

11  
12 Author approval was obtained for the process of linguistic adaptation and validation of  
13 the PAQ-A questionnaire. Cultural adaptation of the Polish PAQ-A was performed following  
14 the basic steps of the standardized questionnaires cultural adaptation process.<sup>21</sup> The original  
15 version of PAQ-A was translated into Polish by two independent translators who are fluent in  
16 English but whose native language is Polish. Then, during a meeting of both translators, both  
17 versions of the translations were compared. A final compatible version was then agreed upon.  
18 It was evaluated by specialists in the field of physical education and health sciences, in terms  
19 of the unambiguity of understanding of the content included in the questions, the transparency  
20 of all items and their usefulness. The accepted version of the questionnaire was translated into  
21 English again. The back translation was made by two independent translators who had no  
22 knowledge of the original PAQ-A version, and whose native language was English (native  
23 speakers). During the meeting, both versions were compared and it was determined which one  
24 was most adequate. Then, all discrepancies between the original version and the version  
25 resulting from the back translation were carefully analysed and corrected. Subsequently, the  
26 PAQ-A was given to young people (n=20) aged between 14 and 19 years in order to detect  
27 possible ambiguities in wording and to assess the understanding of the questionnaire. During  
28 this analysis, students were encouraged to consult with researchers concerning questions or  
29 statements that were unintelligible or misleading. After the appropriate corrections were  
30 made, the final Polish version of the research tool was agreed upon. The Polish version of  
31 PAQ-A is presented in supplementary materials (Suppl. 1).  
32  
33  
34  
35  
36  
37  
38  
39  
40  
41  
42  
43  
44  
45  
46  
47

### 48 ***Study participants***

49  
50 The study was conducted in accordance with the ethical rules of the Helsinki  
51 Declaration. The study protocol was approved by the Bioethics Committee of the University  
52 of Rzeszów (Poland), approval number 9/05/2012. Prior to study commencement, we  
53 obtained written informed parent/guardian and participant consent. We invited adolescents,  
54 aged 14-19 years from 4 randomly selected middle and high schools to participate in this  
55 study (150 informed consents were distributed). Out of this number, 122 parents/adolescents  
56  
57  
58  
59  
60

1  
2  
3 agreed to participate in the study. Of these, 44 were excluded from the study for the following  
4 reasons: disease or injury preventing standard PA (n=2); participants without valid  
5 accelerometer-measurement period (n=23); the device showing a mechanical error and/or  
6  
7 operator error (n=7); incorrect anthropometry (n=1); refusal to participate (n=1); failure to  
8  
9 return or an incomplete survey (n=10). In total, 78 students (38 girls and 40 boys) were  
10  
11 included in the analysis.  
12

### 13 ***Patient and public involvement***

14  
15 Neither patients nor public were involved in the design or planning of this study.  
16  
17

### 18 ***Initial measurements***

19  
20 Anthropometric measurements (body mass, body weight) were performed under  
21 standard conditions. Body height was measured in an upright position, barefoot, to the nearest  
22 0.1 cm using a portable stadiometer (Seca 213). Body mass was assessed with an accuracy of  
23 0.1 kg using a body composition analyser (BC-420, Tanita). Body mass index (BMI) was  
24 calculated as weight (kg)/ height (m)<sup>2</sup>. Based on BMI values, the BMI percentile of individual  
25 participants were calculated. Polish BMI percentile charts specific for age, sex, and body  
26 height were used.<sup>22</sup> Based on the BMI percentile values, underweight (<5th percentile),  
27 healthy weight (between 5th and 85th percentile), overweight (BMI ≥85th percentile and <  
28 95th percentile), or obesity (≥95th percentile) were determined. The definitions of  
29 underweight, healthy weight, overweight, and obesity were based on the recommendations of  
30 the Centers for Disease Control and Prevention.<sup>23</sup>  
31  
32  
33  
34  
35  
36  
37  
38  
39  
40

### 41 ***Accelerometry***

42  
43 An ActiGraph WGT3X-BT monitor device (Pensacola, USA) was used to assess PA.<sup>24</sup>  
44 It is a small device that provides data related to total PA including the frequency, intensity and  
45 duration. The Actigraph accelerometer has been shown to be a reliable and valid tool for the  
46 assessment of different types of PA.<sup>25,26,27</sup> The accelerometer was placed at the waist with a  
47 flexible strap above the right hip bone to measure the number and frequency of participant  
48 movement. The participants were instructed to wear the accelerometer for seven consecutive  
49 days, 24 hours a day, excluding water-based activities (baths, swimming). The Actigraph  
50 accelerometer measures accelerations in the range of 0.05 to 2 g, which is digitized by a 12-  
51 bit analog-to digital converter at a rate of 30 Hz. Data was collected in 5s epochs. Non-wear  
52 time was defined as 60 minutes of consecutive zeros allowing for 2 minutes of non-zero  
53  
54  
55  
56  
57  
58  
59  
60

1  
2  
3 interruptions.<sup>28</sup> A wear time of  $\geq 500$  minutes/day was used as the criterion for a valid day,  
4 and  $\geq 4$  days were used as the criteria for a valid 7-day period of accumulated data (including  
5  $\geq 3$  valid weekdays and  $\geq 1$  valid weekend day).<sup>28</sup> For each participant, the mean moderate-to-  
6 vigorous physical activity (MVPA) (minutes/day) and the mean daily step count were  
7 calculated. The cut-off points from Evenson et al. were selected to determine the time spent  
8 on MVPA level ( $\geq 2296$  counts per minute).<sup>29</sup> MVPA time was calculated as the mean daily  
9 minutes  $\geq 2296$  counts per minute from all valid days. Daily step count was calculated as the  
10 mean daily step count from all valid days. ActiGraph data was analysed using dedicated  
11 Actilife 6.0 software (ActiGraph LLC, Pensacola, Florida, USA).

### 12 13 14 15 16 17 18 19 20 21 22 ***Procedure***

23 Following agreement to participate in the study, participants were examined (initial  
24 measurements) and received an accelerometer for 7 days. After 7 days the PAQ-A was  
25 delivered to students during school time in their classroom. Adolescents were asked to  
26 complete the questionnaire at home. Participants completed the PAQ-A again one week after  
27 completing the first questionnaire to assess test-retest reliability.

### 28 29 30 31 32 33 34 35 36 37 38 39 40 41 42 43 44 45 46 47 48 49 50 51 52 53 54 55 56 57 58 59 60 ***Statistical analysis***

Descriptive statistics (n, frequencies (%), mean $\pm$ SD) were calculated for applicable  
variables. Test-retest reliability was assessed by one-way random-effects intra-class  
correlation coefficient (ICC).<sup>30</sup> Values of ICC less than 0.5 are indicative of poor reliability;  
between 0.5 and 0.75 indicate moderate reliability; between 0.75 and 0.9 indicate good  
reliability, and greater than 0.90 indicate excellent reliability.<sup>31</sup> The internal consistency of the  
questionnaire was analysed using Cronbach's  $\alpha$  coefficient. Removing every item to confirm  
or exclude redundancy of the individual items was also performed by Cronbach's  $\alpha$ . Values of  
 $\alpha$  greater than 0.7 were deemed acceptable for general research purposes.<sup>32</sup> Additionally, an  
item-total correlation values were calculated. Values for an item-total correlation greater or  
equal than 0.3 are considered as acceptable.<sup>33</sup> Validity was assessed by calculating the  
relationship between PAQ-A scores and accelerometry-derived PA metrics using Spearman's  
rank correlation coefficients (rho). Values from 0.1 to 0.2 indicate poor correlation; from 0.3  
to 0.5 fair; from 0.6 to 0.7 moderate and  $\geq 0.8$  very strong correlation.<sup>34</sup> Statistical significance  
was established as a  $p$  value less than 0.05. All analyses were carried out using GNU R  
Software.

## Results

In total, 78 adolescents provided valid data for the PAQ-A and accelerometer measurements. The mean age of the participants was  $15.7 \pm 1.41$  years. The mean non-wear time recorded by the accelerometers was 477 minutes per day (minimum 326; maximum 840 minutes). The general characteristics of the participants are presented in Table 1.

**Table 1.** Sample characteristic

| Variables                                        | Total<br>(n=78) | Girls<br>(n=38) | Boys<br>(n=40) |
|--------------------------------------------------|-----------------|-----------------|----------------|
| Age [years] <sup>a</sup>                         | 15.70 ± 1.41    | 15.34 ± 1.30    | 16.05 ± 1.43   |
| Age [years] <sup>b</sup>                         |                 |                 |                |
| 14                                               | 12 (15.4)       | 8 (10.3)        | 4 (5.1)        |
| 15                                               | 14 (18.0)       | 7 (9.0)         | 7 (9.0)        |
| 16                                               | 16 (20.5)       | 9 (11.5)        | 7 (9.0)        |
| 17                                               | 12 (15.4)       | 4 (5.1)         | 8 (10.3)       |
| 18                                               | 11 (14.1)       | 3 (3.8)         | 8 (10.3)       |
| 19                                               | 13 (16.6)       | 7 (9.0)         | 6 (7.6)        |
| Body height [cm] <sup>a</sup>                    | 167.43 ± 10.49  | 162.24 ± 7.44   | 172.26 ± 10.65 |
| Body weight [kg] <sup>a</sup>                    | 60.49 ± 13.09   | 56.90 ± 12.76   | 63.90 ± 12.63  |
| BMI percentile <sup>a</sup>                      | 56.66 ± 28.84   | 58.03 ± 29.41   | 55.38 ± 28.60  |
| Body mass category <sup>b</sup>                  |                 |                 |                |
| Underweight                                      | 5 (6.41)        | 3 (7.89)        | 2 (5.00)       |
| Healthy weight                                   | 56 (71.80)      | 26 (68.42)      | 30 (75.00)     |
| Overweight                                       | 12 (15.38)      | 5 (13.16)       | 7 (17.50)      |
| Obesity                                          | 5 (6.41)        | 4 (10.53)       | 1 (2.50)       |
| <b>PAQ-A<sup>a</sup></b>                         |                 |                 |                |
| Q1. Spare-time activity: sports                  | 1.85 ± 0.72     | 1.78 ± 0.72     | 1.92 ± 0.71    |
| Q2. Activity during physical education classes   | 3.27 ± 0.94     | 3.03 ± 0.85     | 3.50 ± 0.96    |
| Q3. Lunchtime activity                           | 2.59 ± 1.02     | 2.42 ± 1.08     | 2.75 ± 0.95    |
| Q4. After-school activity                        | 3.03 ± 1.01     | 2.76 ± 0.94     | 3.28 ± 1.01    |
| Q5. Evening activity                             | 2.95 ± 1.16     | 2.74 ± 1.16     | 3.15 ± 1.14    |
| Q6. Weekend-activity                             | 2.71 ± 1.11     | 2.55 ± 1.13     | 2.85 ± 1.08    |
| Q7. Activity frequency during the last 7 days    | 2.99 ± 1.23     | 2.82 ± 1.27     | 3.15 ± 1.19    |
| Q8. Activity frequency during each day last week | 3.09 ± 0.89     | 2.89 ± 0.87     | 3.29 ± 0.87    |
| PAQ-A total                                      | 2.82 ± 0.79     | 2.64 ± 0.80     | 2.99 ± 0.76    |
| <b>Accelerometry<sup>a</sup></b>                 |                 |                 |                |
| MVPA [minutes/day]                               | 44.71 ± 17.24   | 39.86 ± 15.63   | 49.32 ± 17.61  |
| Steps count per day                              | 6928 ± 3064     | 6184 ± 2650     | 7635 ± 3289    |

Data are expressed as: <sup>a</sup> - mean ± SD; <sup>b</sup> - n (%)

Abbreviations: MVPA – moderate-to-vigorous physical activity; Q – question

Table 2 presents results which indicate excellent test-retest reliability for the PAQ-A (ICC=0.97). Similar relationships were found among girls and boys separately (ICC=0.96 and 0.97, respectively). Regarding individual item analyses, the lowest value (ICC=0.86) was



observed for item 5, which informs about evening activity. The obtained correlations presented in Table 2 show statistical significance at the level of  $p < 0.01$ .

**Table 2.** Test-retest reliability (ICC - intra-class correlation coefficient) for PAQ-A

| Variables                                        | Total (n=78) | Girls (n=38) | Boys (n=40) |
|--------------------------------------------------|--------------|--------------|-------------|
| PAQ-A total                                      | 0.97         | 0.96         | 0.97        |
| Q1. Spare-time activity: sports                  | 0.97         | 0.96         | 0.98        |
| Q2. Activity during physical education classes   | 0.87         | 0.83         | 0.88        |
| Q3. Lunchtime activity                           | 0.91         | 0.92         | 0.89        |
| Q4. After-school activity                        | 0.87         | 0.82         | 0.88        |
| Q5. Evening activity                             | 0.86         | 0.84         | 0.88        |
| Q6. Weekend-activity                             | 0.91         | 0.89         | 0.92        |
| Q7. Activity frequency during the last 7 days    | 0.96         | 0.94         | 0.97        |
| Q8. Activity frequency during each day last week | 0.98         | 0.97         | 0.99        |

Abbreviation: Q – question

The internal consistency coefficients of the questionnaire are presented in Table 3. The PAQ-A obtained an internal consistency of  $\alpha=0.93$ . Cronbach's  $\alpha$  indicators for the questionnaire with individual questions removed also had values above 0.9. Item-total correlation values were the lowest for the first and second questions (0.43 and 0.49, respectively). All item-total correlation values exceeded the cutoff of 0.30 indicating each question was related to the overall questionnaire.

**Table 3.** Internal consistency for PAQ-A

| Variables                                                  | Cronbach's coefficient, $\alpha$ | Correlation (item-total) |
|------------------------------------------------------------|----------------------------------|--------------------------|
| PAQ-A total                                                | <b>0.93</b>                      | --                       |
| <b>Reliability with items (Q1-Q8) individually removed</b> |                                  |                          |
| Q1. Spare-time activity: sports                            | 0.93                             | 0.43                     |
| Q2. Activity during physical education classes             | 0.93                             | 0.49                     |
| Q3. Lunchtime activity                                     | 0.92                             | 0.71                     |
| Q4. After-school activity                                  | 0.92                             | 0.74                     |
| Q5. Evening activity                                       | 0.91                             | 0.84                     |
| Q6. Weekend-activity                                       | 0.91                             | 0.81                     |
| Q7. Activity frequency during the last 7 days              | 0.91                             | 0.85                     |
| Q8. Activity frequency during each day last week           | 0.92                             | 0.74                     |

Abbreviation: Q – question

Table 4 presents correlation between PAQ-A and accelerometry. Overall, associations were stronger for the overall PAQ-A score than individual sub-items. A higher correlation was observed between the PAQ-A total score and the number steps per day ( $\rho=0.94$ ) than



between PAQ-A total score and MVPA ( $\rho=0.81$ ). The obtained Spearman correlation coefficients show statistical significance at the level of  $p < 0.01$ .

**Table 4.** Spearman's rank correlation between PAQ-A and accelerometry

| Variables                                        | MVPA<br>[minutes/day] | Steps/day   |
|--------------------------------------------------|-----------------------|-------------|
| Q1. Spare-time activity: sports                  | 0.56                  | 0.56        |
| Q2. Activity during physical education classes   | 0.46                  | 0.52        |
| Q3. Lunchtime activity                           | 0.58                  | 0.67        |
| Q4. After-school activity                        | 0.73                  | 0.76        |
| Q5. Evening activity                             | 0.70                  | 0.83        |
| Q6. Weekend-activity                             | 0.65                  | 0.83        |
| Q7. Activity frequency during the last 7 days    | 0.68                  | 0.82        |
| Q8. Activity frequency during each day last week | 0.60                  | 0.74        |
| <b>PAQ-A total</b>                               | <b>0.81</b>           | <b>0.94</b> |

Abbreviation: MVPA – moderate-to-vigorous physical activity; Q – question

## Discussion

We found no questionnaires evaluating PA validated for Polish adolescents in the literature. Therefore, the present study is at the forefront of obtaining evidence for the validity of the questionnaire developed by Kowalski et al.<sup>18</sup> We present the first PAQ-A cultural adaptation and validation study among Polish adolescents aged 14-19 years. In general, the results of the present study show excellent reliability of the PAQ-A and a very strong correlation of the PAQ-A to accelerometer measurements. Our validity coefficients are higher than previously reported by other validation studies with adolescents.<sup>20,35,36</sup>

In the present study, the ICC for individual items of the PAQ-A ranged from 0.86 to 0.97 which is strong evidence to support good and excellent reliability.<sup>31</sup> Good ICC values were observed for items 2, 4, and 5 (ICC=0.87, 0.87 and 0.86, respectively), and excellent ICC values were found for the others. For the final score of the PAQ-A, test-retest reliability showed ICC = 0.97, which is strong evidence to support reliability of the PAQ-A in this target population. The reliability of the PAQ-A ranged from poor (ICC=0.40) among Vietnamese adolescents,<sup>37</sup> to good in other studies conducted in other countries with adolescents of different races.<sup>20,38,39</sup> Aggio et al. observed that the modified PAQ-A score was stable over time among British adolescents (ICC=0.78),<sup>39</sup> which was comparable with original research,<sup>19</sup> and subsequent reliability studies among Spanish adolescents (ICC=0.71).<sup>35</sup>

1  
2  
3 An estimate of Cronbach's coefficient  $\alpha$  greater than 0.70 is usually considered to be  
4 indicative of a reliable questionnaire.<sup>32</sup> In our study, Cronbach's  $\alpha$  coefficients showed  
5 excellent internal consistency ( $\alpha=0.93$ ), higher in comparison to the original,<sup>19</sup> and other  
6 modified versions of the PAQ-A.<sup>20,35,39</sup> Item-total correlations were the lowest for questions  
7 on spare-time activity, activity during physical education classes and lunchtime, which is  
8 consistent with previous findings.<sup>20,35,39,40</sup> Janz et al. reported that Cronbach's  $\alpha$  for the PAQ-  
9 A ranged from 0.72 to 0.88. Moreover, authors suggested that that completing the  
10 questionnaire during the summer months did not reduce the standardized  $\alpha$  for the PAQ-A.<sup>20</sup>  
11 Among British adolescents Cronbach's  $\alpha$  coefficient for the modified PAQ-A score showed  
12 acceptable inter-item reliability ( $\alpha=0.72$ ). Item-total correlations showed how well each item  
13 correlated with the composite of the remaining items; correlations ranged from  $\alpha = 0.24$  to  
14 0.54 with all additional and modified questions exceeding  $\alpha=0.30$ .<sup>39</sup> Bervoets et al. also  
15 showed an acceptable reliability of PAQ-A for Dutch adolescents. Of all 94 PAQ-A  
16 questionnaires completed by adolescents, Cronbach's  $\alpha$  was 0.76.<sup>40</sup>

17  
18 The PAQ-A was compared with device-based measures of PA to determine the  
19 validity of the PAQ-A using triaxial accelerometry. Accelerometers monitor PA by recording  
20 the acceleration of human movement. Movement sensors, such as pedometers and  
21 accelerometers are suggested as one of the best methods for evaluation of PA and validation  
22 of PA self-report instruments.<sup>41</sup> The convergent validity of the PAQ-A was assessed by  
23 calculating the correlation between the PAQ-A total score and different PA measures  
24 determined by an accelerometer (MVPA and number of steps per day). Very strong  
25 correlations were observed between the PAQ-A total score and number of steps per day  
26 ( $\rho=0.94$ ) and with MVPA ( $\rho=0.81$ ). This correlation for MVPA was higher than that  
27 obtained in the study reported by Janz et al. ( $\rho = 0.63$ ).<sup>20</sup> Our results do not concur with a  
28 validation study of the PAQ-A conducted on Spanish adolescents, which showed reasonable  
29 validity of the PAQ-A for adolescents aged from 12-17 years ( $\rho=0.39$ ).<sup>35</sup> A correlation with  
30 MVPA much lower than in our study, but significant, was reported in a Chinese population  
31 ( $\rho=0.33$ ) of children aged from 8 to 13 years old.<sup>36</sup> These data confirm a line of evidence  
32 suggesting that PA questionnaires for adolescents correlate better with scores obtained from  
33 an accelerometer than PA questionnaires for younger children.<sup>17</sup>

34  
35 The assessment of PA plays a significant role in understanding patterns and influences  
36 of behaviour, designing interventions, and monitoring. To describe the level of PA, a  
37 standardized, reliable and valid tool is essential. Furthermore, in the pediatric population, it is  
38 important to use methods which are non-invasive, easy-to-use and time-saving. Until the  
39  
40  
41  
42  
43  
44  
45  
46  
47  
48  
49  
50  
51  
52  
53  
54  
55  
56  
57  
58  
59  
60

1  
2  
3 development of movement sensors, such as pedometers or accelerometers, the assessment  
4 method for PA has been self-report. The magnitude of correlation between PA recall  
5 questionnaires for youth and device-based PA measures is different for different  
6 questionnaires. Results from a systematic review of 57 studies that examined the correlation  
7 of questionnaire-derived PA measures with accelerometry-derived PA measures, indicate that  
8 overall correlations for total PA range from  $\rho=0.14$  to  $\rho=0.58$ . Of the reviewed studies,  
9 only one third report correlations equal to or higher than 0.40.<sup>14</sup>

15 Among the available validated self-report measures of PA dedicated to youth, one of  
16 the most promising tools may be PAQ-A.<sup>9</sup> The strength of the PAQ-A is that is an easy to use,  
17 relatively inexpensive, and a quick to administer self-report tool. The PAQ-A also provides  
18 specific information about activity levels during different periods of the day (e.g. recess,  
19 physical education, after school etc.) as well as a general PA level for a whole week.  
20 However, questionnaire do not estimate precise amount, frequency, intensity and duration of  
21 PA, what is essential e.g. in accurate examination of dose-response relationship between PA  
22 and health or evaluation the effectiveness of PA-enhancing interventions.<sup>18</sup> Both self-report  
23 and device-based measures of PA have its strengths and limitations, thus for measuring PA a  
24 combination of the device-based measures (such as accelerometers) and self-report  
25 questionnaires seems most promising.<sup>42</sup>

34 Excellent intra-class correlation and internal consistency, as well as very strong  
35 convergent validity with accelerometer-based measures have provided evidence that the PAQ-  
36 A can be a useful tool for large PA assessment studies with Polish adolescents.

## 41 **Limitations**

44 Potential limitations of this study need to be taken into account when interpreting the  
45 results. The PAQ-A is appropriate for high school students between approximately 14-20  
46 years of age who are currently in the school system. However, the age range of participants  
47 recruited in the current study was 14-19 years. The difference in age range is due to the  
48 education system in Poland, in which students finish high school at the age of 19.

53 The relatively small sample size can also be considered as a limitation, however, the  
54 sample size was similar to the original validation study.<sup>19</sup>

56 Another limitation in our study is the missing of a sleeping diary, the relatively high  
57 dropout rate of participants due to accelerometer non-wear periods and a lack of data on their  
58 age, sex, BMI and PA level.

1  
2  
3 The fact that participants completed the PAQ-A at home can also be considered as a  
4 limitation of the study. However, researchers emphasized to participants that the questionnaire  
5 responses need to refer to the week they wore the accelerometer.  
6  
7

8 In our study, we did not adjust for differences in non-wear periods in the  
9 accelerometer measurements, however other studies showed that wear time significantly  
10 affects the assessment of sedentary activity but not MVPA.<sup>43,44</sup>  
11  
12

13 Some authors suggest that internal consistency is not relevant for PA questionnaires  
14 because items refer to different aspects of the construct, e.g., duration versus frequency or  
15 sports versus work and these items do not need to be highly correlated.<sup>45</sup> However, we  
16 decided to include these analyzes, as it allows to compare our results with the results of other  
17 authors.  
18  
19  
20  
21  
22

## 23 **Conclusion**

24 This is the first study addressing the validity and reliability of PAQ-A in Polish  
25 adolescents which may help to assess the applicability of the questionnaire. Our results show  
26 that the Polish version of PAQ-A provides reliable and valid estimates of PA among 14 to 19-  
27 year-old adolescents. The Polish version of PAQ-A can be considered as very useful in  
28 clinical practice and epidemiological studies to assess overall levels of PA in adolescents.  
29  
30  
31  
32  
33  
34  
35  
36

## 37 **References**

- 38  
39  
40  
41  
42  
43  
44  
45  
46  
47  
48  
49  
50  
51  
52  
53  
54  
55  
56  
57  
58  
59  
60
1. Caspersen CJ, Powell KE, Christenson GM. Physical activity, exercise, and physical fitness: definitions and distinctions for health-related research. *Public Health Rep* 1985;**100**:126–31.
  2. Lee IM, Shiroma EJ, Lobelo F, Puska P, Blair SN, Katzmarzyk PT. Effect of physical inactivity on major non-communicable diseases worldwide: an analysis of burden of disease and life expectancy. *Lancet* 2012;**9838**:219–29.
  3. World Health Organization. Prevalence of insufficient physical activity. [http://www.who.int/gho/ncd/risk\\_factors/physical\\_activity/en/](http://www.who.int/gho/ncd/risk_factors/physical_activity/en/) (accessed on July 9, 2019).
  4. Ng M, Fleming T, Robinson M, *et al.* Global, regional, and national prevalence of overweight and obesity in children and adults during 1980–2013: a systematic analysis for the Global Burden of Disease Study 2013. *Lancet* 2014;**9945**: 766–81.

- 1  
2  
3 5. World Health Organization. Obesity and overweight. <https://www.who.int/news-room/fact-sheets/detail/obesity-and-overweight> (accessed on July 9, 2019).
- 4  
5  
6  
7 6. Daniels SR, Jacobson MS, McCrindle BW, *et al.* American Heart Association  
8  
9  
10  
11  
12  
13  
14  
15  
16  
17  
18  
19  
20  
21  
22  
23  
24  
25  
26  
27  
28  
29  
30  
31  
32  
33  
34  
35  
36  
37  
38  
39  
40  
41  
42  
43  
44  
45  
46  
47  
48  
49  
50  
51  
52  
53  
54  
55  
56  
57  
58  
59  
60  
Childhood Obesity Research Summit: executive summary. *Circulation* 2009;**119**:2114-23.
7. Donnelly JE, Hillman CH, Castelli D, *et al.* Physical activity, fitness, cognitive function, and academic achievement in children: a systematic review. *Med Sci Sports Exerc* 2016;**48**:1197–222.
8. Sylvia LG, Bernstein EE, Hubbard JL, *et al.* Practical guide to measuring physical activity. *J Acad Nutr Diet* 2013;**114**:199-208.
9. Biddle SJ, Gorely T, Pearson N, *et al.* An assessment of self-reported physical activity instruments in young people for population surveillance: Project ALPHA. *Int J Behav Nutr Phys Act* 2011;**8**:1.
10. Sallis JF, Saelens BE. Assessment of physical activity by self-report: status, limitations, and future directions. *Res Q Exerc Sport* 2000;**71**:S1-14.
11. Westerterp KR. Assessment of physical activity: a critical appraisal. *Eur J Appl Physiol* 2009;**105**:823-8.
12. Pate RR, Almeida MJ, McIver KL, Pfeiffer KA, Dowda M. Validation and calibration of an accelerometer in preschool children. *Obesity (Silver Spring)* 2006;**14**:2000-6.
13. Sallis JF. Measuring physical activity: practical approaches for program evaluation in Native American communities. *J Public Health Manag Pract* 2010;**16**:404–10.
14. Skender S, Ose J, Chang-Claude J, *et al.* Accelerometry and physical activity questionnaires - a systematic review. *BMC Public Health* 2016;**16**:515.
15. Helmerhorst HJ, Brage S, Warren J, Besson H, Ekelund U. A systematic review of reliability and objective criterion-related validity of physical activity questionnaires. *Int J Behav Nutr Phys Act* 2012;**9**:103.
16. van Poppel MN, Chinapaw MJ, Mokkink LB, van Mechelen W, Terwee CB. Physical activity questionnaires for adults: a systematic review of measurement properties. *Sports Med* 2010;**40**:565–600.
17. Chinapaw MJM, Mokkink LB, van PoppelMNM, *et al.* Physical Activity Questionnaires for youth. A systematic review of measurement properties. *Sports Med* 2010;**40**:539-63.

18. Kowalski KC, Crocker PRE, Donen RM. The Physical Activity Questionnaire for Older Children (PAQ-C) and Adolescents (PAQ-A) Manual. Canada: College of Kinesiology, University of Saskatchewan; 2004:1–38.
19. Kowalski KC, Crocker PRE, Kowalski NP. Convergent validity of the Physical Activity Questionnaire for Adolescents. *Pediatr Exerc Sci* 1997;**9**:342–52.
20. Janz KF, Lutuchy EM, Wenthe P, *et al.* Measuring activity in children and adolescents using self-report: PAQ-C and PAQ-A. *Med Sci Sports Exerc* 2008;**40**:767–72.
21. Geisinger KF. Cross-cultural normative assessment: translation and adaptation issues influencing the normative interpretation of assessment instruments. *Psychol Assess* 1994;**6**:304-12.
22. Kułaga Z, Rózdżyńska A, Palczewska I. Percentile charts of height, body mass and body mass index in children and adolescents in Poland – results of the OLAF study. *Stand Med* 2010;**7**:690–700.
23. Barlow SE, Expert Committee. Expert committee recommendations regarding the prevention, assessment, and treatment of child and adolescent overweight and obesity: summary report. *Pediatrics* 2007;**120**:S164–92.
24. Lee IM, Shiroma EJ. Using accelerometers to measure physical activity in large-scale epidemiological studies: issues and challenges. *Br J Sports Med* 2013;**48**:197-201.
25. Sasaki JE, John D, Freedson PS. Validation and comparison of ActiGraph activity monitors. *J Sci Med Sport* 2011;**14**:411-6.
26. Santos-Lozano A, Santin-Medeiros F, Cardon G, *et al.* Actigraph GT3X: validation and determination of physical activity intensity cut points. *Int J Sports Med* 2013;**34**:975-82.
27. Puyau MR, Adolph AL, Vohra FA, Butte NF. Validation and calibration of physical activity monitors in children. *Obes Res* 2002;**10**:150-7.
28. Troiano RP, Berrigan D, Dodd KW, *et al.* Physical activity in the United States measured by accelerometer. *Med Sci Sports Exerc* 2008;**40**:181–8.
29. Evenson KR, Catellier DJ, Gill K, Ondrak KS, McMurray RG. Calibration of two objective measures of physical activity for children. *J Sports Sci* 2008;**26**:1557-65.
30. Bartko JJ. The intraclass correlation coefficient as a measure of reliability. *Psychol Rep* 1966;**19**:3-11.
31. Koo TK, Li MY. A Guideline of Selecting and Reporting Intraclass Correlation Coefficients for Reliability Research. *J Chiropr Med* 2016;**15**:155-63.



- 1  
2  
3 32. Cronbach LJ. Coefficient alpha and the internal structure of tests. *Psychometrika*  
4 1951;**16**:297-334.  
5  
6 33. Nunnally J, Bernstein I. *Psychometric Theory*. New York: McGraw-Hill, 1994.  
7  
8 34. Chan YH. Biostatistics 104: correlational analysis. *Singap Med J* 2003;**44**:614–19.  
9  
10 35. Martinez-Gomez D, Martinez-de-Haro V, Pozo T, *et al*. Reliability and validity of the  
11 PAQ-A questionnaire to assess physical activity in Spanish adolescents. *Rev Esp*  
12 *Salud Publica* 2009;**83**:427-39.  
13  
14 36. Wang JJ, Baranowski T, Lau WP, *et al*. Validation of the Physical Activity  
15 Questionnaire for Older Children (PAQ-C) among Chinese Children. *Biomed Environ*  
16 *Sci* 2016;**29**:177-86.  
17  
18 37. Lachat CK1, Verstraeten R, Khanh le NB, *et al*. Validity of two physical activity  
19 questionnaires (IPAQ and PAQA) for Vietnamese adolescents in rural and urban  
20 areas. *Int J Behav Nutr Phys Act* 2008;**5**:37.  
21  
22 38. Voss C, Dean PH, Gardner RF, *et al*. Validity and reliability of the Physical Activity  
23 Questionnaire for Children (PAQ-C) and Adolescents (PAQ-A) in individuals with  
24 congenital heart disease. *PLoS One* 2017;**12**:e0175806.  
25  
26 39. Aggio D, Fairclough S, Knowles Z, *et al*. Validity and reliability of a modified  
27 English version of the physical activity questionnaire for adolescents. *Arch Public*  
28 *Health* 2016;**74**:3.  
29  
30 40. Bervoets L, Van Noten C, Van Roosbroeck S, *et al*. Reliability and Validity of the  
31 Dutch Physical Activity Questionnaires for Children (PAQ-C) and Adolescents (PAQ-  
32 A). *Arch Public Health* 2014;**72**:47.  
33  
34 41. Vanhelst J, Hardy L, Gottrand F, *et al*. Technical aspects and relevance of physical  
35 activity assessment in children and adolescents in free-living conditions. *Arch Pediatr*  
36 2012;**19**:1219-25.  
37  
38 42. Hidding LM, Chinapaw MJM, van Poppel MNM, Mokkink LB, Altenburg TM. An  
39 Updated Systematic Review of Childhood Physical Activity Questionnaires. *Sports*  
40 *Med* 2018;**48**:2797-842.  
41  
42 43. Vanhelst J, Vidal F, Drumez E, *et al*. Comparison and validation of accelerometer  
43 wear time and non-wear time algorithms for assessing physical activity levels in  
44 children and adolescents. *BMC Med Res Methodol* 2019;**19**:72.  
45  
46 44. Winkler EA, Gardiner PA, Clark BK, Matthews CE, Owen N, Healy GN. Identifying  
47 sedentary time using automated estimates of accelerometer wear time. *Br J Sports*  
48 *Med* 2012;**46**:436–42.  
49  
50  
51  
52  
53  
54  
55  
56  
57  
58  
59  
60



- 1  
2  
3 45. Terwee CB, Mokkink LB, van Poppel MN, Chinapaw MJ, van Mechelen W, de Vet  
4 HC. Qualitative attributes and measurement properties of physical activity  
5 questionnaires: a checklist. *Sports Med* 2010;40:525-37.  
6  
7  
8  
9  
10  
11  
12

### 13 **Acknowledgement**

14 We are grateful to the participants and their families who volunteered their time to participate  
15 in this research.  
16  
17

### 18 **Authors' contributions**

19 JW - development of the concept of research. JW, JPB, KD, JB, PM, JH – data compilation.  
20 KP, AM, JW, PM - analysis and interpretation of data. KP - statistical analysis. JW writing an  
21 manuscript. JPB, JB, KD - substantive review article. AM, PM - overseeing the final article.  
22 All authors read and approved the final version of the manuscript.  
23  
24  
25  
26  
27  
28  
29

### 30 **Funding**

31 This research received no specific grant from any funding agency in the public, commercial or  
32 not-for-profit sectors.  
33  
34  
35

### 36 **Conflicts of interest**

37 The authors declare no conflict of interest.  
38  
39

### 40 **Data availability statement**

41 Data are available upon reasonable request.  
42  
43  
44

45 **Supplementary file no 1.** Polish version of Physical Activity Questionnaire for Adolescents  
46 (PAQ-A)  
47  
48  
49  
50  
51  
52  
53  
54  
55  
56  
57  
58  
59  
60

## Kwestionariusz Aktywności Fizycznej dla Młodzieży

### Polish version of the Physical Activity Questionnaire for Adolescents (PAQ-A)

Imię i nazwisko: \_\_\_\_\_

Wiek: \_\_\_\_\_

Płeć: K \_\_\_\_\_ M \_\_\_\_\_

Klasa: \_\_\_\_\_

Podejmujemy próbę oceny poziomu Twojej aktywności fizycznej w *ostatnich 7 dniach* (w ciągu ostatniego tygodnia). Odnosi się to do aktywności, które powodują, że się pocisz lub jesteś zmęczony/a, albo do zabaw, które sprawiają, że oddychasz z wysiłkiem, takich jak: podskakiwanie, bieganie, wspinanie się itp.

#### Pamiętaj:

- Nie ma złych lub dobrych odpowiedzi - to nie jest sprawdzian.

- Proszę, odpowiedz na wszystkie pytania tak szczerze i dokładnie jak potrafisz - to bardzo ważne.

#### 1. Aktywność fizyczna w Twoim wolnym czasie:

Czy wykonywałeś/aś którekolwiek z następujących czynności w ciągu *ostatnich 7 dni* (ostatniego tygodnia)? Jeśli tak, ile razy w tygodniu? (Zaznacz tylko jedno kółko w rzędzie).

|                            | 0                     | 1-2                   | 3-4                   | 5-6                   | 7 lub więcej<br>razy  |
|----------------------------|-----------------------|-----------------------|-----------------------|-----------------------|-----------------------|
| Skakanie na skakance       | <input type="radio"/> |
| Wiosłowanie/kajakowanie    | <input type="radio"/> |
| Jazda na rolkach           | <input type="radio"/> |
| Zabawa w berka             | <input type="radio"/> |
| Maszerowanie dla sportu    | <input type="radio"/> |
| Jazda na rowerze           | <input type="radio"/> |
| Jogging/bieganie           | <input type="radio"/> |
| Aerobik                    | <input type="radio"/> |
| Pływanie                   | <input type="radio"/> |
| Gra w palanta/baseball     | <input type="radio"/> |
| Taniec                     | <input type="radio"/> |
| Rugby/football amerykański | <input type="radio"/> |
| Badminton                  | <input type="radio"/> |
| Jazda na deskorolce        | <input type="radio"/> |
| Piłka nożna                | <input type="radio"/> |
| Hokej na ulicy             | <input type="radio"/> |
| Piłka siatkowa             | <input type="radio"/> |
| Unihokej                   | <input type="radio"/> |
| Piłka koszykowa            | <input type="radio"/> |
| Jazda na łyżwach           | <input type="radio"/> |
| Narciarstwo biegowe        | <input type="radio"/> |
| Hokej na lodzie            | <input type="radio"/> |
| Podnoszenie ciężarów       | <input type="radio"/> |
| Gimnastyka                 | <input type="radio"/> |
| Piłka ręczna               | <input type="radio"/> |
| Jazda na nartach           | <input type="radio"/> |
| Tenis ziemny               | <input type="radio"/> |
| Tenis stołowy              | <input type="radio"/> |
| Sporty/sztuki walki        | <input type="radio"/> |
| Jazda konna                | <input type="radio"/> |
| Inne:                      |                       |                       |                       |                       |                       |
| _____                      | <input type="radio"/> |
| _____                      | <input type="radio"/> |

2. **Jak często w ciągu ostatnich 7 dni, w trakcie *lekcji wychowania fizycznego (WF)* byłeś/aś bardzo aktywny/a (intensywne granie, bieganie, skakanie, rzucanie)?**  
(Zaznacz tylko jedną odpowiedź).

1  
2  
3  
4 Nie brałem udziału w lekcji WF ..... O  
5 Prawie nigdy ..... O  
6 Czasami ..... O  
7  
8 Dosyć często ..... O  
9 Zawsze ..... O  
10  
11  
12

- 13 3. **Co zazwyczaj robiłeś/aś w czasie przerwy obiadowej w ciągu ostatnich 7 dni oprócz spożywania**  
14 **posiłku? (Zaznacz tylko jedną odpowiedź).**

15  
16 Siedziałem/am (rozmawiając, czytając, odrabiając zadania domowe) ... O  
17 Stałem/am lub spacerowałem/am ..... O  
18 Trochę biegałem/am lub grałem/am ..... O  
19 Biegałem/am lub grałem/am dość dużo ..... O  
20 Biegałem/am lub grałem/am intensywnie przez większość czasu ..... O  
21  
22  
23  
24

- 25 4. **W ciągu ostatnich 7 dni, przez ile dni *zaraz po szkole* uprawiałeś/aś jakiś sport, trenowałeś/aś**  
26 **taniec, lub grałeś/aś w gry, podczas których byłeś/aś bardzo aktywny/a?**  
27 **(Zaznacz tylko jedną odpowiedź).**

28  
29 W żaden dzień ..... O  
30 1 raz w tygodniu ..... O  
31 2 lub 3 razy w tygodniu ..... O  
32 4 razy w tygodniu ..... O  
33 5 razy w tygodniu ..... O  
34  
35  
36  
37  
38

- 39 5. **W ciągu ostatnich 7 dni, przez ile dni *wieczorami* uprawiałeś/aś jakiś sport, trenowałeś/aś taniec**  
40 **lub grałeś/aś w gry, podczas których byłeś/aś bardzo aktywny/a?**  
41 **(Zaznacz tylko jedną odpowiedź).**

42  
43 W żaden dzień ..... O  
44 1 raz w tygodniu ..... O  
45 2 lub 3 razy w tygodniu ..... O  
46 4 lub 5 razy w tygodniu ..... O  
47 6 lub 7 razy w tygodniu ..... O  
48  
49  
50  
51

- 52 6. **Podczas ostatniego weekendu, ile razy uprawiałeś/aś jakiś sport, tańczyłeś/aś lub grałeś/aś w gry,**  
53 **podczas których byłeś/aś bardzo aktywny/a?**  
54 **(Zaznacz tylko jedną odpowiedź).**

55  
56 Ani razu ..... O  
57 1 raz ..... O  
58 2 lub 3 razy ..... O  
59 4 lub 5 razy ..... O  
60 6 lub więcej razy ..... O

7. Które z następujących pięciu stwierdzeń najlepiej opisują Ciebie w ciągu ostatnich 7 dni? Przeczytaj *wszystkie pięć* stwierdzeń zanim zaznaczysz *jedną* odpowiedź odnoszącą się do Ciebie. (Zaznacz tylko jedną odpowiedź).

- Cały lub większość czasu spędzałem/am wykonując rzeczy, które wymagały bardzo mało wysiłku fizycznego
- Czasami (1-2 razy w zeszłym tygodniu) byłem/am aktywny/a fizycznie w wolnym czasie (np. uprawiałem/am jakiś sport, biegałem/am, jeździłem/am rowerem, pływałem/am, ćwiczyłem/am aerobik)
- Często (3-4 razy w zeszłym tygodniu) byłem/am aktywny/a fizycznie w wolnym czasie
- Dosyć często (5-6 razy w zeszłym tygodniu) byłem/am aktywny/a fizycznie w wolnym czasie
- Bardzo często (7 lub więcej razy w zeszłym tygodniu) byłem/am aktywny/a fizycznie w wolnym czasie

8. Zaznacz jak często byłeś/aś aktywny/a fizycznie każdego dnia w ciągu ostatniego tygodnia (np. uprawiając jakiś sport, uczestnicząc w grach ruchowych, tańcząc lub wykonując inne formy aktywności fizycznej).

|              | Wcale                 | Trochę                | Średnio               | Często                | Bardzo często         |
|--------------|-----------------------|-----------------------|-----------------------|-----------------------|-----------------------|
| Poniedziałek | <input type="radio"/> |
| Wtorek       | <input type="radio"/> |
| Środa        | <input type="radio"/> |
| Czwartek     | <input type="radio"/> |
| Piątek       | <input type="radio"/> |
| Sobota       | <input type="radio"/> |
| Niedziela    | <input type="radio"/> |

9. Czy byłeś/aś chory/a w ciągu ostatniego tygodnia lub zdarzyło się coś, co powstrzymało Cię przed zwykle wykonywaną aktywnością fizyczną? (Zaznacz jedną opcję).

Tak .....

Nie .....

Jeśli tak, to co uniemożliwiło Ci podjęcie tej aktywności? \_\_\_\_\_

**STROBE 2007 (v4) checklist of items to be included in reports of observational studies in epidemiology\***  
**Checklist for cohort, case-control, and cross-sectional studies (combined)**

| Section/Topic             | Item # | Recommendation                                                                                                                                                                                                                                                                                                                                                                                                                                                         | Reported on page # |
|---------------------------|--------|------------------------------------------------------------------------------------------------------------------------------------------------------------------------------------------------------------------------------------------------------------------------------------------------------------------------------------------------------------------------------------------------------------------------------------------------------------------------|--------------------|
| Title and abstract        | 1      | (a) Indicate the study's design with a commonly used term in the title or the abstract                                                                                                                                                                                                                                                                                                                                                                                 | 1, 2               |
|                           |        | (b) Provide in the abstract an informative and balanced summary of what was done and what was found                                                                                                                                                                                                                                                                                                                                                                    | 2                  |
| <b>Introduction</b>       |        |                                                                                                                                                                                                                                                                                                                                                                                                                                                                        |                    |
| Background/rationale      | 2      | Explain the scientific background and rationale for the investigation being reported                                                                                                                                                                                                                                                                                                                                                                                   | 3, 4               |
| Objectives                | 3      | State specific objectives, including any pre-specified hypotheses                                                                                                                                                                                                                                                                                                                                                                                                      | 4                  |
| <b>Methods</b>            |        |                                                                                                                                                                                                                                                                                                                                                                                                                                                                        |                    |
| Study design              | 4      | Present key elements of study design early in the paper                                                                                                                                                                                                                                                                                                                                                                                                                | 4,7                |
| Setting                   | 5      | Describe the setting, locations, and relevant dates, including periods of recruitment, exposure, follow-up, and data collection                                                                                                                                                                                                                                                                                                                                        | 4,5,6,7            |
| Participants              | 6      | (a) <i>Cohort study</i> —Give the eligibility criteria, and the sources and methods of selection of participants. Describe methods of follow-up<br><i>Case-control study</i> —Give the eligibility criteria, and the sources and methods of case ascertainment and control selection. Give the rationale for the choice of cases and controls<br><i>Cross-sectional study</i> —Give the eligibility criteria, and the sources and methods of selection of participants | 5,6                |
|                           |        | (b) <i>Cohort study</i> —For matched studies, give matching criteria and number of exposed and unexposed<br><i>Case-control study</i> —For matched studies, give matching criteria and the number of controls per case                                                                                                                                                                                                                                                 |                    |
| Variables                 | 7      | Clearly define all outcomes, exposures, predictors, potential confounders, and effect modifiers. Give diagnostic criteria, if applicable                                                                                                                                                                                                                                                                                                                               | 6                  |
| Data sources/ measurement | 8*     | For each variable of interest, give sources of data and details of methods of assessment (measurement). Describe comparability of assessment methods if there is more than one group                                                                                                                                                                                                                                                                                   | 4, 5, 6,7          |
| Bias                      | 9      | Describe any efforts to address potential sources of bias                                                                                                                                                                                                                                                                                                                                                                                                              |                    |
| Study size                | 10     | Explain how the study size was arrived at                                                                                                                                                                                                                                                                                                                                                                                                                              | 4,5,6              |
| Quantitative variables    | 11     | Explain how quantitative variables were handled in the analyses. If applicable, describe which groupings were chosen and why                                                                                                                                                                                                                                                                                                                                           | 4                  |
| Statistical methods       | 12     | (a) Describe all statistical methods, including those used to control for confounding                                                                                                                                                                                                                                                                                                                                                                                  | 7                  |
|                           |        | (b) Describe any methods used to examine subgroups and interactions                                                                                                                                                                                                                                                                                                                                                                                                    | 7                  |
|                           |        | (c) Explain how missing data were addressed                                                                                                                                                                                                                                                                                                                                                                                                                            |                    |
|                           |        | (d) <i>Cohort study</i> —If applicable, explain how loss to follow-up was addressed<br><i>Case-control study</i> —If applicable, explain how matching of cases and controls was addressed                                                                                                                                                                                                                                                                              |                    |

|                          |     |                                                                                                                                                                                                              |          |
|--------------------------|-----|--------------------------------------------------------------------------------------------------------------------------------------------------------------------------------------------------------------|----------|
|                          |     | <i>Cross-sectional study</i> —If applicable, describe analytical methods taking account of sampling strategy                                                                                                 |          |
|                          |     | (e) Describe any sensitivity analyses                                                                                                                                                                        | 7        |
| <b>Results</b>           |     |                                                                                                                                                                                                              |          |
| Participants             | 13* | (a) Report numbers of individuals at each stage of study—eg numbers potentially eligible, examined for eligibility, confirmed eligible, included in the study, completing follow-up, and analysed            | 5,6      |
|                          |     | (b) Give reasons for non-participation at each stage                                                                                                                                                         | 5,6      |
|                          |     | (c) Consider use of a flow diagram                                                                                                                                                                           |          |
| Descriptive data         | 14* | (a) Give characteristics of study participants (eg demographic, clinical, social) and information on exposures and potential confounders                                                                     | 7,8      |
|                          |     | (b) Indicate number of participants with missing data for each variable of interest                                                                                                                          |          |
|                          |     | (c) <i>Cohort study</i> —Summarise follow-up time (eg, average and total amount)                                                                                                                             |          |
| Outcome data             | 15* | <i>Cohort study</i> —Report numbers of outcome events or summary measures over time                                                                                                                          |          |
|                          |     | <i>Case-control study</i> —Report numbers in each exposure category, or summary measures of exposure                                                                                                         |          |
|                          |     | <i>Cross-sectional study</i> —Report numbers of outcome events or summary measures                                                                                                                           | 7-10     |
| Main results             | 16  | (a) Give unadjusted estimates and, if applicable, confounder-adjusted estimates and their precision (eg, 95% confidence interval). Make clear which confounders were adjusted for and why they were included |          |
|                          |     | (b) Report category boundaries when continuous variables were categorized                                                                                                                                    |          |
|                          |     | (c) If relevant, consider translating estimates of relative risk into absolute risk for a meaningful time period                                                                                             |          |
| Other analyses           | 17  | Report other analyses done—eg analyses of subgroups and interactions, and sensitivity analyses                                                                                                               |          |
| <b>Discussion</b>        |     |                                                                                                                                                                                                              |          |
| Key results              | 18  | Summarise key results with reference to study objectives                                                                                                                                                     | 10       |
| Limitations              | 19  | Discuss limitations of the study, taking into account sources of potential bias or imprecision. Discuss both direction and magnitude of any potential bias                                                   | 12       |
| Interpretation           | 20  | Give a cautious overall interpretation of results considering objectives, limitations, multiplicity of analyses, results from similar studies, and other relevant evidence                                   | 10,11,12 |
| Generalisability         | 21  | Discuss the generalisability (external validity) of the study results                                                                                                                                        | 12       |
| <b>Other information</b> |     |                                                                                                                                                                                                              |          |
| Funding                  | 22  | Give the source of funding and the role of the funders for the present study and, if applicable, for the original study on which the present article is based                                                | 16       |

\*Give information separately for cases and controls in case-control studies and, if applicable, for exposed and unexposed groups in cohort and cross-sectional studies.

**Note:** An Explanation and Elaboration article discusses each checklist item and gives methodological background and published examples of transparent reporting. The STROBE checklist is best used in conjunction with this article (freely available on the Web sites of PLoS Medicine at <http://www.plosmedicine.org/>, Annals of Internal Medicine at <http://www.annals.org/>, and Epidemiology at <http://www.epidem.com/>). Information on the STROBE Initiative is available at [www.strobe-statement.org](http://www.strobe-statement.org).

# BMJ Open

## Adaptation and validation of the Physical Activity Questionnaire for Adolescents (PAQ-A) among Polish adolescents – cross-sectional study

|                                 |                                                                                                                                                                                                                                                                                                                                                                                                                                                                                                        |
|---------------------------------|--------------------------------------------------------------------------------------------------------------------------------------------------------------------------------------------------------------------------------------------------------------------------------------------------------------------------------------------------------------------------------------------------------------------------------------------------------------------------------------------------------|
| Journal:                        | <i>BMJ Open</i>                                                                                                                                                                                                                                                                                                                                                                                                                                                                                        |
| Manuscript ID                   | bmjopen-2019-030567.R3                                                                                                                                                                                                                                                                                                                                                                                                                                                                                 |
| Article Type:                   | Original research                                                                                                                                                                                                                                                                                                                                                                                                                                                                                      |
| Date Submitted by the Author:   | 20-Sep-2019                                                                                                                                                                                                                                                                                                                                                                                                                                                                                            |
| Complete List of Authors:       | Wyszyńska, Justyna; Rzeszow University<br>Matłosz, Piotr; Rzeszow University, Faculty of Physical Education<br>Podgórska-Bednarz, Justyna; Rzeszow University, Medical Faculty<br>Herbert, Jarosław; Rzeszow University, Faculty of Physical Education<br>Przednowek, Krzysztof; Rzeszow University, Faculty of Physical Education<br>Baran, Joanna; Rzeszow University, Medical Faculty<br>Dereń, Katarzyna; Rzeszow University, Medical Faculty<br>Mazur, Artur; Rzeszow University, Medical Faculty |
| <b>Primary Subject Heading</b>: | Public health                                                                                                                                                                                                                                                                                                                                                                                                                                                                                          |
| Secondary Subject Heading:      | Sports and exercise medicine                                                                                                                                                                                                                                                                                                                                                                                                                                                                           |
| Keywords:                       | adolescent, physical activity, validation                                                                                                                                                                                                                                                                                                                                                                                                                                                              |
|                                 |                                                                                                                                                                                                                                                                                                                                                                                                                                                                                                        |

SCHOLARONE™  
Manuscripts



1  
2  
3 **Adaptation and validation of the Physical Activity Questionnaire for Adolescents**  
4 **(PAQ-A) among Polish adolescents – cross-sectional study**  
5

6  
7 Justyna Wyszynska<sup>1</sup>, Piotr Matłosz<sup>2</sup>, Justyna Podgórska-Bednarz<sup>1</sup>, Jarosław Herbert<sup>2</sup>,  
8 Krzysztof Przednowek<sup>2</sup>, Joanna Baran<sup>1</sup>, Katarzyna Dereń<sup>1</sup>, Artur Mazur<sup>1</sup>  
9

- 10  
11 1. Medical Faculty, University of Rzeszów, Poland  
12 2. Faculty of Physical Education, University of Rzeszów, Poland  
13  
14  
15  
16  
17

18 **Corresponding Author**  
19

20 Justyna Wyszynska, Ph.D.  
21

22 Email address: [justyna.wyszynska@onet.pl](mailto:justyna.wyszynska@onet.pl)  
23

24 Institute of Physiotherapy, Medical Faculty, University of Rzeszów  
25

26 Ul. Kopisto 2a  
27

28 35-959, Rzeszów, Poland  
29

30 ORCID: 0000-0002-5786-6214  
31  
32  
33  
34

35 **Word count: 3501**  
36  
37  
38  
39  
40  
41  
42  
43  
44  
45  
46  
47  
48  
49  
50  
51  
52  
53  
54  
55  
56  
57  
58  
59  
60

## Abstract

*Objective.* The lack of a widely accepted questionnaire used to assess the physical activity of adolescents in the Polish language creates a need to introduce such a valid, reliable, inexpensive and quick tool for assessment. This study was designed to culturally adapt and validate the Physical Activity Questionnaires for Adolescents (PAQ-A) in the Polish language.

*Design.* Cross-sectional study.

*Participants and outcome measures.* Cultural adaptation of the Polish version of the PAQ-A was performed following the standardized questionnaires cultural adaptation process. In a sample of 78 adolescents aged 14 to 19 years, the PAQ-A test-retest was administered within a 1-week interval. Reliability was analysed by the Intraclass Correlation Coefficient (ICC) and internal consistency with Cronbach's  $\alpha$ . Participants completed the PAQ-A, and wore an accelerometer for 7 consecutive days. The PAQ-A was compared to physical activity parameters obtained using the accelerometer.

*Results.* Test-retest reliability showed ICC=0.97 for the total score of PAQ-A. Internal consistency was excellent ( $\alpha=0.93$ ). The PAQ-A was very strongly correlated with steps per day ( $\rho=0.94$ ) and with moderate-to-vigorous physical activity ( $\rho=0.81$ ) assessed by the accelerometer.

*Conclusions.* The Polish version of the PAQ-A is a valuable tool to estimate general levels of physical activity among adolescents from 14-19 years old.

*Keywords.* adaptation, adolescents, physical activity, validation

## Strengths and limitations of this study

- This study provides the first Physical Activity Questionnaire for Adolescents cultural adaptation and validation study among Polish adolescents aged 14-19 years.
- The Polish version of the Physical Activity Questionnaire for Adolescents was compared with a device-based measure of physical activity (triaxial accelerometry) to determine the validity of the questionnaire.
- In this study, we used international standards for validating the questionnaire.
- Limitations of this study are the small sample size and the relatively high dropout rate of participants due to accelerometer non-wear periods.

## Introduction

One of the most important factors determining human health is physical activity (PA), which is defined as body movement resulting from skeletal muscle contraction during which energy expenditure is increased.<sup>1</sup> Physical inactivity is responsible for about 3.2 million deaths per year, being one of the most important risk factors for non-communicable diseases such as coronary heart disease, type 2 diabetes, and cancer.<sup>2</sup> According to the World Health Organization, more than 80% of the world's adolescent population is insufficiently physically active.<sup>3</sup> Increasing evidence suggests that declining PA is a major factor for higher prevalence of childhood obesity.<sup>4</sup> Worldwide, over 340 million children and adolescents aged 5-19 were overweight or obese in 2016.<sup>5</sup> Physical activity is not only an important factor in the prevention of chronic diseases such as obesity, hypertension and cardiovascular diseases<sup>6</sup>; there is also evidence that regular participation in PA has a positive impact on psychosocial wellbeing, cognitive outcomes, and mental health.<sup>7</sup> Accurate measurement of PA is important to understanding the association between PA and health, but also to monitor changes in PA patterns, and to evaluate the effectiveness of interventions.

To assess PA level, valid and reliable measures are required. The doubly labeled water method is the most widely accepted technique and the gold standard for assessing total energy expenditure, however, it is not often used for research studies as it is expensive, time-intensive, and cannot capture qualitative data.<sup>8</sup> Self-report questionnaires, despite their limitations, are often used due to their low cost and ease of administration, ability to measure large samples and to contextualise PA.<sup>9</sup> Weaknesses of self-report questionnaires include, among others inaccuracies, the tendency to over-report PA levels, inability to use with young children (below the age of 10 or 11), and inability to compare results across studies due to the large number of measures available.<sup>10,11</sup> A more accurate estimate of PA is provided by device-based measures (such as accelerometers, pedometers, heart-rate monitors).<sup>11</sup> An advantage of accelerometers include minute-by-minute monitoring, capturing intensity level, large memory capacities,<sup>8</sup> and feasibility with young children.<sup>12</sup> However, accelerometers do not provide information on both the type and context of PA. Moreover, accelerometers are expensive and require technical expertise, specialized hardware, software, and individual programming.<sup>13</sup> Results of a systematic review that compared PA measures from accelerometers with PA scores of questionnaires, indicated that correlations between questionnaires and accelerometry were weak to moderate.<sup>14</sup> This finding is in agreement with previous reviews.<sup>15,16</sup>

1  
2  
3 A systematic review by Chinapaw et al. that examined 61 versions of PA questionnaires  
4 for youth found that none of the questionnaires included in the review had acceptable levels of  
5 reliability and validity according to guidelines described in the Qualitative Attributes and  
6 Measurement Properties of Physical Activity Questionnaires.<sup>17</sup> Biddle et al. also reviewed  
7 available self-report PA instruments developed for children and adolescents to assess their  
8 suitability and feasibility for use in population surveillance systems and tracking trends over  
9 time, particularly in Europe. The authors identified 20 activity-based measures, of which three  
10 were supported by the majority of the expert group: the Physical Activity Questionnaire for  
11 Older Children (PAQ-C) and the Physical Activity Questionnaire for Adolescents (PAQ-A),  
12 Youth Risk Behaviour Surveillance Survey, and the Teen Health Survey. These PA  
13 measurement instruments demonstrated both reliability and validity but also ease of use.<sup>9</sup>

14  
15  
16  
17  
18  
19  
20  
21  
22  
23 The PAQ-A was developed in Canada by Kowalski et al.<sup>18</sup> Research results by Kowalski  
24 and others indicate that PAQ-A is a reliable, inexpensive, easy and quick tool used to assess  
25 PA in adolescents.<sup>18-20</sup> Cultural adaptation and validation of this questionnaire has not yet  
26 been assessed in Poland. The adaptation of a tool to assess the PA of adolescents in Poland  
27 will allow not only for easy and quick large-scale research, but will also enable result  
28 comparison among countries.

29  
30  
31  
32  
33  
34 The main aim of this study was to assess the reliability and validity of a Polish version of  
35 the PAQ-A in adolescents.

## 36 37 38 **Methods**

### 39 40 41 *Study design and setting*

42  
43 A cross-sectional survey was conducted at 4 randomly selected middle and high  
44 schools in south-eastern Poland. Six classes were randomly selected from the schools  
45 representing students ranging from 14 to 19 years of age.

### 46 47 48 49 *The PAQ-A*

50  
51 The PAQ-A is an 8-item, 7-day PA recall that assesses participation in various types  
52 of PA including activity during physical education, lunch break, after school, during evenings  
53 and weekends. A 9th item not used in the calculation of the activity score asks adolescents if  
54 they were sick or otherwise prevented from engaging in regular PA. The PAQ-A was  
55 originally designed for adolescents aged 14 to 20. The questionnaire can be used to assess the  
56 level of PA during the school year, but not during holidays. Each item is scored according to a  
57  
58  
59  
60

1  
2  
3 five-point scale (1-5), with "1" indicating low and "5" a high level of PA. The end result is the  
4 average value of the points obtained, with higher scores corresponding to a higher level of  
5 PA.<sup>18</sup>  
6  
7  
8  
9

### 10 ***Translation and cultural adaptation of the Polish PAQ-A***

11  
12 Author approval was obtained for the process of linguistic adaptation and validation of  
13 the PAQ-A questionnaire. Cultural adaptation of the Polish PAQ-A was performed following  
14 the basic steps of the standardized questionnaires cultural adaptation process.<sup>21</sup> The original  
15 version of PAQ-A was translated into Polish by two independent translators who are fluent in  
16 English but whose native language is Polish. Then, during a meeting of both translators, both  
17 versions of the translations were compared. A final compatible version was then agreed upon.  
18 It was evaluated by specialists in the field of physical education and health sciences, in terms  
19 of the unambiguity of understanding of the content included in the questions, the transparency  
20 of all items and their usefulness. The accepted version of the questionnaire was translated into  
21 English again. The back translation was made by two independent translators who had no  
22 knowledge of the original PAQ-A version, and whose native language was English (native  
23 speakers). During the meeting, both versions were compared and it was determined which one  
24 was most adequate. Then, all discrepancies between the original version and the version  
25 resulting from the back translation were carefully analysed and corrected. Subsequently, the  
26 PAQ-A was given to young people (n=20) aged between 14 and 19 years in order to detect  
27 possible ambiguities in wording and to assess the understanding of the questionnaire. During  
28 this analysis, students were encouraged to consult with researchers concerning questions or  
29 statements that were unintelligible or misleading. After the appropriate corrections were  
30 made, the final Polish version of the research tool was agreed upon. The Polish version of  
31 PAQ-A is presented in supplementary materials (Suppl. 1).  
32  
33  
34  
35  
36  
37  
38  
39  
40  
41  
42  
43  
44  
45  
46  
47

### 48 ***Study participants***

49  
50 The study was conducted in accordance with the ethical rules of the Helsinki  
51 Declaration. The study protocol was approved by the Bioethics Committee of the University  
52 of Rzeszów (Poland), approval number 9/05/2012. Prior to study commencement, we  
53 obtained written informed parent/guardian and participant consent. We invited adolescents,  
54 aged 14-19 years from 4 randomly selected middle and high schools to participate in this  
55 study (150 informed consents were distributed). Out of this number, 122 parents/adolescents  
56  
57  
58  
59  
60

1  
2  
3 agreed to participate in the study. Of these, 44 were excluded from the study for the following  
4 reasons: disease or injury preventing standard PA (n=2); participants without valid  
5 accelerometer-measurement period (n=23); the device showing a mechanical error and/or  
6 operator error (n=7); incorrect anthropometry (n=1); refusal to participate (n=1); failure to  
7 return or an incomplete survey (n=10). In total, 78 students (38 girls and 40 boys) were  
8 included in the analysis.  
9

### 14 ***Patient and public involvement***

16 Neither patients nor public were involved in the design or planning of this study.

### 18 ***Initial measurements***

20 Anthropometric measurements (body mass, body weight) were performed under  
21 standard conditions. Body height was measured in an upright position, barefoot, to the nearest  
22 0.1 cm using a portable stadiometer (Seca 213). Body mass was assessed with an accuracy of  
23 0.1 kg using a body composition analyser (BC-420, Tanita). Body mass index (BMI) was  
24 calculated as weight (kg)/ height (m)<sup>2</sup>. Based on BMI values, the BMI percentile of individual  
25 participants were calculated. Polish BMI percentile charts specific for age, sex, and body  
26 height were used.<sup>22</sup> Based on the BMI percentile values, underweight (<5th percentile),  
27 healthy weight (between 5th and 85th percentile), overweight (BMI ≥85th percentile and <  
28 95th percentile), or obesity (≥95th percentile) were determined. The definitions of  
29 underweight, healthy weight, overweight, and obesity were based on the recommendations of  
30 the Centers for Disease Control and Prevention.<sup>23</sup>  
31  
32  
33  
34  
35  
36  
37  
38  
39  
40

### 41 ***Accelerometry***

43 An ActiGraph WGT3X-BT monitor device (Pensacola, USA) was used to assess PA.<sup>24</sup>  
44 It is a small device that provides data related to total PA including the frequency, intensity and  
45 duration. The Actigraph accelerometer has been shown to be a reliable and valid tool for the  
46 assessment of different types of PA.<sup>25,26,27</sup> The accelerometer was placed at the waist with a  
47 flexible strap above the right hip bone to measure the number and frequency of participant  
48 movement. The participants were instructed to wear the accelerometer for seven consecutive  
49 days, 24 hours a day, excluding water-based activities (baths, swimming). The Actigraph  
50 accelerometer measures accelerations in the range of 0.05 to 2 g, which is digitized by a 12-  
51 bit analog-to digital converter at a rate of 30 Hz. Data was collected in 5s epochs. Non-wear  
52 time was defined as 60 minutes of consecutive zeros allowing for 2 minutes of non-zero  
53  
54  
55  
56  
57  
58  
59  
60

1  
2  
3 interruptions.<sup>28</sup> A wear time of  $\geq 500$  minutes/day was used as the criterion for a valid day,  
4 and  $\geq 4$  days were used as the criteria for a valid 7-day period of accumulated data (including  
5  $\geq 3$  valid weekdays and  $\geq 1$  valid weekend day).<sup>28</sup> For each participant, the mean moderate-to-  
6 vigorous physical activity (MVPA) (minutes/day) and the mean daily step count were  
7 calculated. The cut-off points from Evenson et al. were selected to determine the time spent  
8 on MVPA level ( $\geq 2296$  counts per minute).<sup>29</sup> MVPA time was calculated as the mean daily  
9 minutes  $\geq 2296$  counts per minute from all valid days. Daily step count was calculated as the  
10 mean daily step count from all valid days. ActiGraph data was analysed using dedicated  
11 Actilife 6.0 software (ActiGraph LLC, Pensacola, Florida, USA).

### 12 13 14 15 16 17 18 19 ***Procedure***

20  
21  
22 Following agreement to participate in the study, participants were examined (initial  
23 measurements) and received an accelerometer for 7 days. After 7 days the PAQ-A was  
24 delivered to students during school time in their classroom. Adolescents were asked to  
25 complete the questionnaire at home. Participants completed the PAQ-A again one week after  
26 completing the first questionnaire to assess test-retest reliability.

### 27 28 29 30 31 32 ***Statistical analysis***

33  
34 Descriptive statistics (n, frequencies (%), mean $\pm$ SD) were calculated for applicable  
35 variables. Test-retest reliability was assessed by one-way random-effects intra-class  
36 correlation coefficient (ICC).<sup>30</sup> Values of ICC less than 0.5 are indicative of poor reliability;  
37 between 0.5 and 0.75 indicate moderate reliability; between 0.75 and 0.9 indicate good  
38 reliability, and greater than 0.90 indicate excellent reliability.<sup>31</sup> The internal consistency of the  
39 questionnaire was analysed using Cronbach's  $\alpha$  coefficient. Removing every item to confirm  
40 or exclude redundancy of the individual items was also performed by Cronbach's  $\alpha$ . Values of  
41  $\alpha$  greater than 0.7 were deemed acceptable for general research purposes.<sup>32</sup> Additionally, an  
42 item-total correlation values were calculated. Values for an item-total correlation greater or  
43 equal than 0.3 are considered as acceptable.<sup>33</sup> Validity was assessed by calculating the  
44 relationship between PAQ-A scores and accelerometry-derived PA metrics using Spearman's  
45 rank correlation coefficients (rho). Values from 0.1 to 0.2 indicate poor correlation; from 0.3  
46 to 0.5 fair; from 0.6 to 0.7 moderate and  $\geq 0.8$  very strong correlation.<sup>34</sup> Statistical significance  
47 was established as a  $p$  value less than 0.05. All analyses were carried out using GNU R  
48 Software.



## Results

In total, 78 adolescents provided valid data for the PAQ-A and accelerometer measurements. The mean age of the participants was  $15.7 \pm 1.41$  years. The mean non-wear time recorded by the accelerometers was 477 minutes per day (minimum 326; maximum 840 minutes). The general characteristics of the participants are presented in Table 1.

**Table 1.** Sample characteristic

| Variables                                        | Total<br>(n=78) | Girls<br>(n=38) | Boys<br>(n=40) |
|--------------------------------------------------|-----------------|-----------------|----------------|
| Age [years] <sup>a</sup>                         | 15.70 ± 1.41    | 15.34 ± 1.30    | 16.05 ± 1.43   |
| Age [years] <sup>b</sup>                         |                 |                 |                |
| 14                                               | 12 (15.4)       | 8 (10.3)        | 4 (5.1)        |
| 15                                               | 14 (18.0)       | 7 (9.0)         | 7 (9.0)        |
| 16                                               | 16 (20.5)       | 9 (11.5)        | 7 (9.0)        |
| 17                                               | 12 (15.4)       | 4 (5.1)         | 8 (10.3)       |
| 18                                               | 11 (14.1)       | 3 (3.8)         | 8 (10.3)       |
| 19                                               | 13 (16.6)       | 7 (9.0)         | 6 (7.6)        |
| Body height [cm] <sup>a</sup>                    | 167.43 ± 10.49  | 162.24 ± 7.44   | 172.26 ± 10.65 |
| Body weight [kg] <sup>a</sup>                    | 60.49 ± 13.09   | 56.90 ± 12.76   | 63.90 ± 12.63  |
| BMI percentile <sup>a</sup>                      | 56.66 ± 28.84   | 58.03 ± 29.41   | 55.38 ± 28.60  |
| Body mass category <sup>b</sup>                  |                 |                 |                |
| Underweight                                      | 5 (6.41)        | 3 (7.89)        | 2 (5.00)       |
| Healthy weight                                   | 56 (71.80)      | 26 (68.42)      | 30 (75.00)     |
| Overweight                                       | 12 (15.38)      | 5 (13.16)       | 7 (17.50)      |
| Obesity                                          | 5 (6.41)        | 4 (10.53)       | 1 (2.50)       |
| <b>PAQ-A<sup>a</sup></b>                         |                 |                 |                |
| Q1. Spare-time activity: sports                  | 1.85 ± 0.72     | 1.78 ± 0.72     | 1.92 ± 0.71    |
| Q2. Activity during physical education classes   | 3.27 ± 0.94     | 3.03 ± 0.85     | 3.50 ± 0.96    |
| Q3. Lunchtime activity                           | 2.59 ± 1.02     | 2.42 ± 1.08     | 2.75 ± 0.95    |
| Q4. After-school activity                        | 3.03 ± 1.01     | 2.76 ± 0.94     | 3.28 ± 1.01    |
| Q5. Evening activity                             | 2.95 ± 1.16     | 2.74 ± 1.16     | 3.15 ± 1.14    |
| Q6. Weekend-activity                             | 2.71 ± 1.11     | 2.55 ± 1.13     | 2.85 ± 1.08    |
| Q7. Activity frequency during the last 7 days    | 2.99 ± 1.23     | 2.82 ± 1.27     | 3.15 ± 1.19    |
| Q8. Activity frequency during each day last week | 3.09 ± 0.89     | 2.89 ± 0.87     | 3.29 ± 0.87    |
| PAQ-A total                                      | 2.82 ± 0.79     | 2.64 ± 0.80     | 2.99 ± 0.76    |
| <b>Accelerometry<sup>a</sup></b>                 |                 |                 |                |
| MVPA [minutes/day]                               | 44.71 ± 17.24   | 39.86 ± 15.63   | 49.32 ± 17.61  |
| Steps count per day                              | 6928 ± 3064     | 6184 ± 2650     | 7635 ± 3289    |

Data are expressed as: <sup>a</sup> - mean ± SD; <sup>b</sup> - n (%)

Abbreviations: MVPA – moderate-to-vigorous physical activity; Q – question

Table 2 presents results which indicate excellent test-retest reliability for the PAQ-A (ICC=0.97). Similar relationships were found among girls and boys separately (ICC=0.96 and 0.97, respectively). Regarding individual item analyses, the lowest value (ICC=0.86) was observed for item 5, which informs about evening activity. The obtained correlations presented in Table 2 show statistical significance at the level of  $p < 0.01$ .

**Table 2.** Test-retest reliability (ICC - intra-class correlation coefficient) for PAQ-A

| Variables                                        | Total<br>(n=78) | Girls<br>(n=38) | Boys<br>(n=40) |
|--------------------------------------------------|-----------------|-----------------|----------------|
| PAQ-A total                                      | 0.97            | 0.96            | 0.97           |
| Q1. Spare-time activity: sports                  | 0.97            | 0.96            | 0.98           |
| Q2. Activity during physical education classes   | 0.87            | 0.83            | 0.88           |
| Q3. Lunchtime activity                           | 0.91            | 0.92            | 0.89           |
| Q4. After-school activity                        | 0.87            | 0.82            | 0.88           |
| Q5. Evening activity                             | 0.86            | 0.84            | 0.88           |
| Q6. Weekend-activity                             | 0.91            | 0.89            | 0.92           |
| Q7. Activity frequency during the last 7 days    | 0.96            | 0.94            | 0.97           |
| Q8. Activity frequency during each day last week | 0.98            | 0.97            | 0.99           |

Abbreviation: Q – question

The internal consistency coefficients of the questionnaire are presented in Table 3. The PAQ-A obtained an internal consistency of  $\alpha=0.93$ . Cronbach's  $\alpha$  indicators for the questionnaire with individual questions removed also had values above 0.9. Item-total correlation values were the lowest for the first and second questions (0.43 and 0.49, respectively). All item-total correlation values exceeded the cutoff of 0.30 indicating each question was related to the overall questionnaire.

**Table 3.** Internal consistency for PAQ-A

| Variables                                                  | Cronbach's<br>coefficient, $\alpha$ | Correlation<br>(item-total) |
|------------------------------------------------------------|-------------------------------------|-----------------------------|
| PAQ-A total                                                | <b>0.93</b>                         | --                          |
| <b>Reliability with items (Q1-Q8) individually removed</b> |                                     |                             |
| Q1. Spare-time activity: sports                            | 0.93                                | 0.43                        |
| Q2. Activity during physical education classes             | 0.93                                | 0.49                        |
| Q3. Lunchtime activity                                     | 0.92                                | 0.71                        |
| Q4. After-school activity                                  | 0.92                                | 0.74                        |
| Q5. Evening activity                                       | 0.91                                | 0.84                        |
| Q6. Weekend-activity                                       | 0.91                                | 0.81                        |
| Q7. Activity frequency during the last 7 days              | 0.91                                | 0.85                        |
| Q8. Activity frequency during each day last week           | 0.92                                | 0.74                        |

Abbreviation: Q – question

Table 4 presents correlation between PAQ-A and accelerometry. Overall, associations were stronger for the overall PAQ-A score than individual sub-items. A higher correlation was observed between the PAQ-A total score and the number steps per day ( $\rho=0.94$ ) than between PAQ-A total score and MVPA ( $\rho=0.81$ ). The obtained Spearman correlation coefficients show statistical significance at the level of  $p < 0.01$ .

**Table 4.** Spearman's rank correlation between PAQ-A and accelerometry

| Variables                                        | MVPA<br>[minutes/day] | Steps/day   |
|--------------------------------------------------|-----------------------|-------------|
| Q1. Spare-time activity: sports                  | 0.56                  | 0.56        |
| Q2. Activity during physical education classes   | 0.46                  | 0.52        |
| Q3. Lunchtime activity                           | 0.58                  | 0.67        |
| Q4. After-school activity                        | 0.73                  | 0.76        |
| Q5. Evening activity                             | 0.70                  | 0.83        |
| Q6. Weekend-activity                             | 0.65                  | 0.83        |
| Q7. Activity frequency during the last 7 days    | 0.68                  | 0.82        |
| Q8. Activity frequency during each day last week | 0.60                  | 0.74        |
| <b>PAQ-A total</b>                               | <b>0.81</b>           | <b>0.94</b> |

Abbreviation: MVPA – moderate-to-vigorous physical activity; Q – question

## Discussion

We found no questionnaires evaluating PA validated for Polish adolescents in the literature. Therefore, the present study is at the forefront of obtaining evidence for the validity of the questionnaire developed by Kowalski et al.<sup>18</sup> We present the first PAQ-A cultural adaptation and validation study among Polish adolescents aged 14-19 years. In general, the results of the present study show excellent reliability of the PAQ-A and a very strong correlation of the PAQ-A to accelerometer measurements. Our validity coefficients are higher than previously reported by other validation studies with adolescents.<sup>20,35,36</sup>

In the present study, the ICC for individual items of the PAQ-A ranged from 0.86 to 0.97 which is strong evidence to support good and excellent reliability.<sup>31</sup> Good ICC values were observed for items 2, 4, and 5 (ICC=0.87, 0.87 and 0.86, respectively), and excellent ICC values were found for the others. For the final score of the PAQ-A, test-retest reliability showed ICC = 0.97, which is strong evidence to support reliability of the PAQ-A in this target population. The reliability of the PAQ-A ranged from poor (ICC=0.40) among Vietnamese adolescents,<sup>37</sup> to good in other studies conducted in other countries with adolescents of different races.<sup>20,38,39</sup> Aggio et al. observed that the modified PAQ-A score was stable over time among British adolescents (ICC=0.78),<sup>39</sup> which was comparable with original research,<sup>19</sup> and subsequent reliability studies among Spanish adolescents (ICC=0.71).<sup>35</sup>

An estimate of Cronbach's coefficient  $\alpha$  greater than 0.70 is usually considered to be indicative of a reliable questionnaire.<sup>32</sup> In our study, Cronbach's  $\alpha$  coefficients showed excellent internal consistency ( $\alpha=0.93$ ), higher in comparison to the original,<sup>19</sup> and other

1  
2  
3 modified versions of the PAQ-A.<sup>20,35,39</sup> Item-total correlations were the lowest for questions  
4 on spare-time activity, activity during physical education classes and lunchtime, which is  
5 consistent with previous findings.<sup>20,35,39,40</sup> Janz et al. reported that Cronbach's  $\alpha$  for the PAQ-  
6 A ranged from 0.72 to 0.88. Moreover, authors suggested that that completing the  
7 questionnaire during the summer months did not reduce the standardized  $\alpha$  for the PAQ-A.<sup>20</sup>  
8 Among British adolescents Cronbach's  $\alpha$  coefficient for the modified PAQ-A score showed  
9 acceptable inter-item reliability ( $\alpha=0.72$ ). Item-total correlations showed how well each item  
10 correlated with the composite of the remaining items; correlations ranged from  $\alpha = 0.24$  to  
11 0.54 with all additional and modified questions exceeding  $\alpha=0.30$ .<sup>39</sup> Bervoets et al. also  
12 showed an acceptable reliability of PAQ-A for Dutch adolescents. Of all 94 PAQ-A  
13 questionnaires completed by adolescents, Cronbach's  $\alpha$  was 0.76.<sup>40</sup>

14  
15  
16  
17  
18  
19  
20  
21  
22 The PAQ-A was compared with device-based measures of PA to determine the  
23 validity of the PAQ-A using triaxial accelerometry. Accelerometers monitor PA by recording  
24 the acceleration of human movement. Movement sensors, such as pedometers and  
25 accelerometers are suggested as one of the best methods for evaluation of PA and validation  
26 of PA self-report instruments.<sup>41</sup> The convergent validity of the PAQ-A was assessed by  
27 calculating the correlation between the PAQ-A total score and different PA measures  
28 determined by an accelerometer (MVPA and number of steps per day). Very strong  
29 correlations were observed between the PAQ-A total score and number of steps per day  
30 ( $\rho=0.94$ ) and with MVPA ( $\rho=0.81$ ). This correlation for MVPA was higher than that  
31 obtained in the study reported by Janz et al. ( $\rho = 0.63$ ).<sup>20</sup> Our results do not concur with a  
32 validation study of the PAQ-A conducted on Spanish adolescents, which showed reasonable  
33 validity of the PAQ-A for adolescents aged from 12-17 years ( $\rho=0.39$ ).<sup>35</sup> A correlation with  
34 MVPA much lower than in our study, but significant, was reported in a Chinese population  
35 ( $\rho=0.33$ ) of children aged from 8 to 13 years old.<sup>36</sup> These data confirm a line of evidence  
36 suggesting that PA questionnaires for adolescents correlate better with scores obtained from  
37 an accelerometer than PA questionnaires for younger children.<sup>17</sup>

38  
39  
40  
41  
42  
43  
44  
45  
46  
47  
48  
49  
50 The assessment of PA plays a significant role in understanding patterns and influences  
51 of behaviour, designing interventions, and monitoring. To describe the level of PA, a  
52 standardized, reliable and valid tool is essential. Furthermore, in the pediatric population, it is  
53 important to use methods which are non-invasive, easy-to-use and time-saving. Until the  
54 development of movement sensors, such as pedometers or accelerometers, the assessment  
55 method for PA has been self-report. The magnitude of correlation between PA recall  
56 questionnaires for youth and device-based PA measures is different for different  
57  
58  
59  
60

1  
2  
3 questionnaires. Results from a systematic review of 57 studies that examined the correlation  
4 of questionnaire-derived PA measures with accelerometry-derived PA measures, indicate that  
5 overall correlations for total PA range from  $\rho=0.14$  to  $\rho=0.58$ . Of the reviewed studies,  
6 only one third report correlations equal to or higher than 0.40.<sup>14</sup>  
7  
8  
9

10 Among the available validated self-report measures of PA dedicated to youth, one of  
11 the most promising tools may be PAQ-A.<sup>9</sup> The strength of the PAQ-A is that is an easy to use,  
12 relatively inexpensive, and a quick to administer self-report tool. The PAQ-A also provides  
13 specific information about activity levels during different periods of the day (e.g. recess,  
14 physical education, after school etc.) as well as a general PA level for a whole week.  
15 However, questionnaire do not estimate precise amount, frequency, intensity and duration of  
16 PA, what is essential e.g. in accurate examination of dose-response relationship between PA  
17 and health or evaluation the effectiveness of PA-enhancing interventions.<sup>18</sup> Both self-report  
18 and device-based measures of PA have its strengths and limitations, thus for measuring PA a  
19 combination of the device-based measures (such as accelerometers) and self-report  
20 questionnaires seems most promising.<sup>42</sup>  
21  
22  
23  
24  
25  
26  
27  
28

29 Excellent intra-class correlation and internal consistency, as well as very strong  
30 convergent validity with accelerometer-based measures have provided evidence that the PAQ-  
31 A can be a useful tool for large PA assessment studies with Polish adolescents.  
32  
33  
34  
35

### 36 **Limitations**

37  
38

39 Potential limitations of this study need to be taken into account when interpreting the  
40 results. The PAQ-A is appropriate for high school students between approximately 14-20  
41 years of age who are currently in the school system. However, the age range of participants  
42 recruited in the current study was 14-19 years. The difference in age range is due to the  
43 education system in Poland, in which students finish high school at the age of 19.  
44  
45  
46  
47

48 The relatively small sample size can also be considered as a limitation, however, the  
49 sample size was similar to the original validation study.<sup>19</sup>  
50

51 Another limitation in our study is the missing of a sleeping diary, the relatively high  
52 dropout rate of participants due to accelerometer non-wear periods and a lack of data on their  
53 age, sex, BMI and PA level.  
54  
55

56 The fact that participants completed the PAQ-A at home can also be considered as a  
57 limitation of the study. However, researchers emphasized to participants that the questionnaire  
58 responses need to refer to the week they wore the accelerometer.  
59  
60

1  
2  
3 In our study, we did not adjust for differences in non-wear periods in the  
4 accelerometer measurements, because the measurement was carried out 24 hours/day.<sup>43</sup>

5  
6 Some authors suggest that internal consistency is not relevant for PA questionnaires  
7 because items refer to different aspects of the construct, e.g., duration versus frequency or  
8 sports versus work and these items do not need to be highly correlated.<sup>44</sup> However, we  
9 decided to include these analyzes, as it allows to compare our results with the results of other  
10 authors.  
11  
12  
13  
14  
15  
16

## 17 **Conclusion**

18 This is the first study addressing the validity and reliability of PAQ-A in Polish  
19 adolescents which may help to assess the applicability of the questionnaire. Our results show  
20 that the Polish version of PAQ-A provides reliable and valid estimates of PA among 14 to 19-  
21 year-old adolescents. The Polish version of PAQ-A can be considered as very useful in  
22 clinical practice and epidemiological studies to assess overall levels of PA in adolescents.  
23  
24  
25  
26  
27  
28  
29

## 30 **References**

- 31  
32  
33  
34 1. Caspersen CJ, Powell KE, Christenson GM. Physical activity, exercise, and physical  
35 fitness: definitions and distinctions for health-related research. *Public Health Rep*  
36 1985;**100**:126–31.  
37  
38 2. Lee IM, Shiroma EJ, Lobelo F, Puska P, Blair SN, Katzmarzyk PT. Effect of physical  
39 inactivity on major non-communicable diseases worldwide: an analysis of burden of  
40 disease and life expectancy. *Lancet* 2012;**9838**:219–29.  
41  
42 3. World Health Organization. Prevalence of insufficient physical activity.  
43 [http://www.who.int/gho/ncd/risk\\_factors/physical\\_activity/en/](http://www.who.int/gho/ncd/risk_factors/physical_activity/en/) (accessed on July 9,  
44 2019).  
45  
46 4. Ng M, Fleming T, Robinson M, *et al.* Global, regional, and national prevalence of  
47 overweight and obesity in children and adults during 1980–2013: a systematic analysis  
48 for the Global Burden of Disease Study 2013. *Lancet* 2014;**9945**: 766–81.  
49  
50 5. World Health Organization. Obesity and overweight. [https://www.who.int/news-](https://www.who.int/news-room/fact-sheets/detail/obesity-and-overweight)  
51 [room/fact-sheets/detail/obesity-and-overweight](https://www.who.int/news-room/fact-sheets/detail/obesity-and-overweight) (accessed on July 9, 2019).  
52  
53  
54  
55  
56  
57  
58  
59  
60



- 1  
2  
3 6. Daniels SR, Jacobson MS, McCrindle BW, *et al.* American Heart Association  
4 Childhood Obesity Research Summit: executive summary. *Circulation*  
5 2009;**119**:2114-23.  
6  
7
- 8 7. Donnelly JE, Hillman CH, Castelli D, *et al.* Physical activity, fitness, cognitive  
9 function, and academic achievement in children: a systematic review. *Med Sci Sports*  
10 *Exerc* 2016;**48**:1197–222.  
11  
12
- 13 8. Sylvia LG, Bernstein EE, Hubbard JL, *et al.* Practical guide to measuring physical  
14 activity. *J Acad Nutr Diet* 2013;**114**:199-208.  
15  
16
- 17 9. Biddle SJ, Gorely T, Pearson N, *et al.* An assessment of self-reported physical activity  
18 instruments in young people for population surveillance: Project ALPHA. *Int J Behav*  
19 *Nutr Phys Act* 2011;**8**:1.  
20  
21
- 22 10. Sallis JF, Saelens BE. Assessment of physical activity by self-report: status,  
23 limitations, and future directions. *Res Q Exerc Sport* 2000;**71**:S1-14.  
24  
25
- 26 11. Westerterp KR. Assessment of physical activity: a critical appraisal. *Eur J Appl*  
27 *Physiol* 2009;**105**:823-8.  
28  
29
- 30 12. Pate RR, Almeida MJ, McIver KL, Pfeiffer KA, Dowda M. Validation and calibration  
31 of an accelerometer in preschool children. *Obesity (Silver Spring)* 2006;**14**:2000-6.  
32  
33
- 34 13. Sallis JF. Measuring physical activity: practical approaches for program evaluation in  
35 Native American communities. *J Public Health Manag Pract* 2010;**16**:404–10.  
36  
37
- 38 14. Skender S, Ose J, Chang-Claude J, *et al.* Accelerometry and physical activity  
39 questionnaires - a systematic review. *BMC Public Health* 2016;**16**:515.  
40  
41
- 42 15. Helmerhorst HJ, Brage S, Warren J, Besson H, Ekelund U. A systematic review of  
43 reliability and objective criterion-related validity of physical activity  
44 questionnaires. *Int J Behav Nutr Phys Act* 2012;**9**:103.  
45  
46
- 47 16. van Poppel MN, Chinapaw MJ, Mokkink LB, van Mechelen W, Terwee CB. Physical  
48 activity questionnaires for adults: a systematic review of measurement  
49 properties. *Sports Med* 2010;**40**:565–600.  
50  
51
- 52 17. Chinapaw MJM, Mokkink LB, van PoppelMNM, *et al.* Physical Activity  
53 Questionnaires for youth. A systematic review of measurement properties. *Sports Med*  
54 2010;**40**:539-63.  
55  
56
- 57 18. Kowalski KC, Crocker PRE, Donen RM. The Physical Activity Questionnaire for  
58 Older Children (PAQ-C) and Adolescents (PAQ-A) Manual. Canada: College of  
59 Kinesiology, University of Saskatchewan; 2004:1–38.  
60



19. Kowalski KC, Crocker PRE, Kowalski NP. Convergent validity of the Physical Activity Questionnaire for Adolescents. *Pediatr Exerc Sci* 1997;**9**:342–52.
20. Janz KF, Lutuchy EM, Wenthe P, *et al.* Measuring activity in children and adolescents using self-report: PAQ-C and PAQ-A. *Med Sci Sports Exerc* 2008;**40**:767–72.
21. Geisinger KF. Cross-cultural normative assessment: translation and adaptation issues influencing the normative interpretation of assessment instruments. *Psychol Assess* 1994;**6**:304-12.
22. Kułaga Z, Rózdżyńska A, Palczewska I. Percentile charts of height, body mass and body mass index in children and adolescents in Poland – results of the OLAF study. *Stand Med* 2010;**7**:690–700.
23. Barlow SE, Expert Committee. Expert committee recommendations regarding the prevention, assessment, and treatment of child and adolescent overweight and obesity: summary report. *Pediatrics* 2007;**120**:S164–92.
24. Lee IM, Shiroma EJ. Using accelerometers to measure physical activity in large-scale epidemiological studies: issues and challenges. *Br J Sports Med* 2013;**48**:197-201.
25. Sasaki JE, John D, Freedson PS. Validation and comparison of ActiGraph activity monitors. *J Sci Med Sport* 2011;**14**:411-6.
26. Santos-Lozano A, Santin-Medeiros F, Cardon G, *et al.* Actigraph GT3X: validation and determination of physical activity intensity cut points. *Int J Sports Med* 2013;**34**:975-82.
27. Puyau MR, Adolph AL, Vohra FA, Butte NF. Validation and calibration of physical activity monitors in children. *Obes Res* 2002;**10**:150-7.
28. Troiano RP, Berrigan D, Dodd KW, *et al.* Physical activity in the United States measured by accelerometer. *Med Sci Sports Exerc* 2008;**40**:181–8.
29. Evenson KR, Catellier DJ, Gill K, Ondrak KS, McMurray RG. Calibration of two objective measures of physical activity for children. *J Sports Sci* 2008;**26**:1557-65.
30. Bartko JJ. The intraclass correlation coefficient as a measure of reliability. *Psychol Rep* 1966;**19**:3-11.
31. Koo TK, Li MY. A Guideline of Selecting and Reporting Intraclass Correlation Coefficients for Reliability Research. *J Chiropr Med* 2016;**15**:155-63.
32. Cronbach LJ. Coefficient alpha and the internal structure of tests. *Psychometrika* 1951;**16**:297-334.
33. Nunnally J, Bernstein I. *Psychometric Theory*. New York: McGraw-Hill, 1994.
34. Chan YH. Biostatistics 104: correlational analysis. *Singap Med J* 2003;**44**:614–19.

- 1  
2  
3 35. Martinez-Gomez D, Martinez-de-Haro V, Pozo T, *et al.* Reliability and validity of the  
4 PAQ-A questionnaire to assess physical activity in Spanish adolescents. *Rev Esp*  
5 *Salud Publica* 2009;**83**:427-39.  
6  
7  
8 36. Wang JJ, Baranowski T, Lau WP, *et al.* Validation of the Physical Activity  
9 Questionnaire for Older Children (PAQ-C) among Chinese Children. *Biomed Environ*  
10 *Sci* 2016;**29**:177-86.  
11  
12 37. Lachat CK1, Verstraeten R, Khanh le NB, *et al.* Validity of two physical activity  
13 questionnaires (IPAQ and PAQA) for Vietnamese adolescents in rural and urban  
14 areas. *Int J Behav Nutr Phys Act* 2008;**5**:37.  
15  
16 38. Voss C, Dean PH, Gardner RF, *et al.* Validity and reliability of the Physical Activity  
17 Questionnaire for Children (PAQ-C) and Adolescents (PAQ-A) in individuals with  
18 congenital heart disease. *PLoS One* 2017;**12**:e0175806.  
19  
20 39. Aggio D, Fairclough S, Knowles Z, *et al.* Validity and reliability of a modified  
21 English version of the physical activity questionnaire for adolescents. *Arch Public*  
22 *Health* 2016;**74**:3.  
23  
24 40. Bervoets L, Van Noten C, Van Roosbroeck S, *et al.* Reliability and Validity of the  
25 Dutch Physical Activity Questionnaires for Children (PAQ-C) and Adolescents (PAQ-  
26 A). *Arch Public Health* 2014;**72**:47.  
27  
28 41. Vanhelst J, Hardy L, Gottrand F, *et al.* Technical aspects and relevance of physical  
29 activity assessment in children and adolescents in free-living conditions. *Arch Pediatr*  
30 *2012*;**19**:1219-25.  
31  
32 42. Hidding LM, Chinapaw MJM, van Poppel MNM, Mokkink LB, Altenburg TM. An  
33 Updated Systematic Review of Childhood Physical Activity Questionnaires. *Sports*  
34 *Med* 2018;**48**:2797-842.  
35  
36 43. Herrmann SD, Barreira TV, Kang M, Ainsworth BE. How many hours are enough?  
37 Accelerometer wear time may provide bias in daily activity estimates. *J Phys Act*  
38 *Health* 2013;**10**:742-9.  
39  
40 44. Terwee CB, Mokkink LB, van Poppel MN, Chinapaw MJ, van Mechelen W, de Vet  
41 HC. Qualitative attributes and measurement properties of physical activity  
42 questionnaires: a checklist. *Sports Med* 2010;**40**:525-37.  
43  
44  
45  
46  
47  
48  
49  
50  
51  
52  
53  
54  
55  
56  
57  
58  
59  
60

### **Acknowledgement**

We are grateful to the participants and their families who volunteered their time to participate in this research.

### **Authors' contributions**

JW - development of the concept of research. JW, JPB, KD, JB, PM, JH – data compilation. KP, AM, JW, PM - analysis and interpretation of data. KP - statistical analysis. JW writing an manuscript. JPB, JB, KD - substantive review article. AM, PM - overseeing the final article. All authors read and approved the final version of the manuscript.

### **Funding**

This research received no specific grant from any funding agency in the public, commercial or not-for-profit sectors.

### **Conflicts of interest**

The authors declare no conflict of interest.

### **Data availability statement**

Data are available upon reasonable request.

**Supplementary file no 1.** Polish version of Physical Activity Questionnaire for Adolescents (PAQ-A)

## Kwestionariusz Aktywności Fizycznej dla Młodzieży

### Polish version of the Physical Activity Questionnaire for Adolescents (PAQ-A)

Imię i nazwisko: \_\_\_\_\_

Wiek: \_\_\_\_\_

Płeć: K \_\_\_\_\_ M \_\_\_\_\_

Klasa: \_\_\_\_\_

Podejmujemy próbę oceny poziomu Twojej aktywności fizycznej w *ostatnich 7 dniach* (w ciągu ostatniego tygodnia). Odnosi się to do aktywności, które powodują, że się pocisz lub jesteś zmęczony/a, albo do zabaw, które sprawiają, że oddychasz z wysiłkiem, takich jak: podskakiwanie, bieganie, wspinanie się itp.

#### Pamiętaj:

- Nie ma złych lub dobrych odpowiedzi - to nie jest sprawdzian.

- Proszę, odpowiedz na wszystkie pytania tak szczerze i dokładnie jak potrafisz - to bardzo ważne.

#### 1. Aktywność fizyczna w Twoim wolnym czasie:

Czy wykonywałeś/aś którekolwiek z następujących czynności w ciągu *ostatnich 7 dni* (ostatniego tygodnia)? Jeśli tak, ile razy w tygodniu? (Zaznacz tylko jedno kółko w rzędzie).

|                            | 0                     | 1-2                   | 3-4                   | 5-6                   | 7 lub więcej<br>razy  |
|----------------------------|-----------------------|-----------------------|-----------------------|-----------------------|-----------------------|
| Skakanie na skakance       | <input type="radio"/> |
| Wiosłowanie/kajakowanie    | <input type="radio"/> |
| Jazda na rolkach           | <input type="radio"/> |
| Zabawa w berka             | <input type="radio"/> |
| Maszerowanie dla sportu    | <input type="radio"/> |
| Jazda na rowerze           | <input type="radio"/> |
| Jogging/bieganie           | <input type="radio"/> |
| Aerobik                    | <input type="radio"/> |
| Pływanie                   | <input type="radio"/> |
| Gra w palanta/baseball     | <input type="radio"/> |
| Taniec                     | <input type="radio"/> |
| Rugby/football amerykański | <input type="radio"/> |
| Badminton                  | <input type="radio"/> |
| Jazda na deskorolce        | <input type="radio"/> |
| Piłka nożna                | <input type="radio"/> |
| Hokej na ulicy             | <input type="radio"/> |
| Piłka siatkowa             | <input type="radio"/> |
| Unihokej                   | <input type="radio"/> |
| Piłka koszykowa            | <input type="radio"/> |
| Jazda na łyżwach           | <input type="radio"/> |
| Narciarstwo biegowe        | <input type="radio"/> |
| Hokej na lodzie            | <input type="radio"/> |
| Podnoszenie ciężarów       | <input type="radio"/> |
| Gimnastyka                 | <input type="radio"/> |
| Piłka ręczna               | <input type="radio"/> |
| Jazda na nartach           | <input type="radio"/> |
| Tenis ziemny               | <input type="radio"/> |
| Tenis stołowy              | <input type="radio"/> |
| Sporty/sztuki walki        | <input type="radio"/> |
| Jazda konna                | <input type="radio"/> |
| Inne:                      |                       |                       |                       |                       |                       |
| _____                      | <input type="radio"/> |
| _____                      | <input type="radio"/> |

2. **Jak często w ciągu ostatnich 7 dni, w trakcie *lekcji wychowania fizycznego (WF)* byłeś/aś bardzo aktywny/a (intensywne granie, bieganie, skakanie, rzucanie)?**  
(Zaznacz tylko jedną odpowiedź).

1  
2  
3  
4 Nie brałem udziału w lekcji WF ..... O  
5 Prawie nigdy ..... O  
6 Czasami ..... O  
7  
8 Dosyć często ..... O  
9 Zawsze ..... O  
10  
11  
12

- 13 3. **Co zazwyczaj robiłeś/aś w czasie przerwy obiadowej w ciągu ostatnich 7 dni oprócz spożywania**  
14 **posiłku? (Zaznacz tylko jedną odpowiedź).**

15  
16 Siedziałem/am (rozmawiając, czytając, odrabiając zadania domowe) ... O  
17 Stałem/am lub spacerowałem/am ..... O  
18 Trochę biegałem/am lub grałem/am ..... O  
19 Biegałem/am lub grałem/am dość dużo ..... O  
20 Biegałem/am lub grałem/am intensywnie przez większość czasu ..... O  
21  
22  
23  
24

- 25 4. **W ciągu ostatnich 7 dni, przez ile dni *zaraz po szkole* uprawiałeś/aś jakiś sport, trenowałeś/aś**  
26 **taniec, lub grałeś/aś w gry, podczas których byłeś/aś bardzo aktywny/a?**  
27 **(Zaznacz tylko jedną odpowiedź).**

28  
29 W żaden dzień ..... O  
30 1 raz w tygodniu ..... O  
31 2 lub 3 razy w tygodniu ..... O  
32 4 razy w tygodniu ..... O  
33 5 razy w tygodniu ..... O  
34  
35  
36  
37  
38

- 39 5. **W ciągu ostatnich 7 dni, przez ile dni *wieczorami* uprawiałeś/aś jakiś sport, trenowałeś/aś taniec**  
40 **lub grałeś/aś w gry, podczas których byłeś/aś bardzo aktywny/a?**  
41 **(Zaznacz tylko jedną odpowiedź).**

42  
43 W żaden dzień ..... O  
44 1 raz w tygodniu ..... O  
45 2 lub 3 razy w tygodniu ..... O  
46 4 lub 5 razy w tygodniu ..... O  
47 6 lub 7 razy w tygodniu ..... O  
48  
49  
50  
51

- 52 6. **Podczas ostatniego weekendu, ile razy uprawiałeś/aś jakiś sport, tańczyłeś/aś lub grałeś/aś w gry,**  
53 **podczas których byłeś/aś bardzo aktywny/a?**  
54 **(Zaznacz tylko jedną odpowiedź).**

55  
56 Ani razu ..... O  
57 1 raz ..... O  
58 2 lub 3 razy ..... O  
59 4 lub 5 razy ..... O  
60 6 lub więcej razy ..... O

7. Które z następujących pięciu stwierdzeń najlepiej opisują Ciebie w ciągu ostatnich 7 dni? Przeczytaj *wszystkie pięć* stwierdzeń zanim zaznaczysz *jedną* odpowiedź odnoszącą się do Ciebie. (Zaznacz tylko jedną odpowiedź).

- Cały lub większość czasu spędzałem/am wykonując rzeczy, które wymagały bardzo mało wysiłku fizycznego
- Czasami (1-2 razy w zeszłym tygodniu) byłem/am aktywny/a fizycznie w wolnym czasie (np. uprawiałem/am jakiś sport, biegałem/am, jeździłem/am rowerem, pływałem/am, ćwiczyłem/am aerobik)
- Często (3-4 razy w zeszłym tygodniu) byłem/am aktywny/a fizycznie w wolnym czasie
- Dosyć często (5-6 razy w zeszłym tygodniu) byłem/am aktywny/a fizycznie w wolnym czasie
- Bardzo często (7 lub więcej razy w zeszłym tygodniu) byłem/am aktywny/a fizycznie w wolnym czasie

8. Zaznacz jak często byłeś/aś aktywny/a fizycznie każdego dnia w ciągu ostatniego tygodnia (np. uprawiając jakiś sport, uczestnicząc w grach ruchowych, tańcząc lub wykonując inne formy aktywności fizycznej).

|              | Wcale                 | Trochę                | Średnio               | Często                | Bardzo często         |
|--------------|-----------------------|-----------------------|-----------------------|-----------------------|-----------------------|
| Poniedziałek | <input type="radio"/> |
| Wtorek       | <input type="radio"/> |
| Środa        | <input type="radio"/> |
| Czwartek     | <input type="radio"/> |
| Piątek       | <input type="radio"/> |
| Sobota       | <input type="radio"/> |
| Niedziela    | <input type="radio"/> |

9. Czy byłeś/aś chory/a w ciągu ostatniego tygodnia lub zdarzyło się coś, co powstrzymało Cię przed zwykle wykonywaną aktywnością fizyczną? (Zaznacz jedną opcję).

Tak .....

Nie .....

Jeśli tak, to co uniemożliwiło Ci podjęcie tej aktywności? \_\_\_\_\_

**STROBE 2007 (v4) checklist of items to be included in reports of observational studies in epidemiology\***  
**Checklist for cohort, case-control, and cross-sectional studies (combined)**

| Section/Topic             | Item # | Recommendation                                                                                                                                                                                                                                                                                                                                                                                                                                                         | Reported on page # |
|---------------------------|--------|------------------------------------------------------------------------------------------------------------------------------------------------------------------------------------------------------------------------------------------------------------------------------------------------------------------------------------------------------------------------------------------------------------------------------------------------------------------------|--------------------|
| Title and abstract        | 1      | (a) Indicate the study's design with a commonly used term in the title or the abstract                                                                                                                                                                                                                                                                                                                                                                                 | 1, 2               |
|                           |        | (b) Provide in the abstract an informative and balanced summary of what was done and what was found                                                                                                                                                                                                                                                                                                                                                                    | 2                  |
| <b>Introduction</b>       |        |                                                                                                                                                                                                                                                                                                                                                                                                                                                                        |                    |
| Background/rationale      | 2      | Explain the scientific background and rationale for the investigation being reported                                                                                                                                                                                                                                                                                                                                                                                   | 3, 4               |
| Objectives                | 3      | State specific objectives, including any pre-specified hypotheses                                                                                                                                                                                                                                                                                                                                                                                                      | 4                  |
| <b>Methods</b>            |        |                                                                                                                                                                                                                                                                                                                                                                                                                                                                        |                    |
| Study design              | 4      | Present key elements of study design early in the paper                                                                                                                                                                                                                                                                                                                                                                                                                | 4,7                |
| Setting                   | 5      | Describe the setting, locations, and relevant dates, including periods of recruitment, exposure, follow-up, and data collection                                                                                                                                                                                                                                                                                                                                        | 4,5,6,7            |
| Participants              | 6      | (a) <i>Cohort study</i> —Give the eligibility criteria, and the sources and methods of selection of participants. Describe methods of follow-up<br><i>Case-control study</i> —Give the eligibility criteria, and the sources and methods of case ascertainment and control selection. Give the rationale for the choice of cases and controls<br><i>Cross-sectional study</i> —Give the eligibility criteria, and the sources and methods of selection of participants | 5,6                |
|                           |        | (b) <i>Cohort study</i> —For matched studies, give matching criteria and number of exposed and unexposed<br><i>Case-control study</i> —For matched studies, give matching criteria and the number of controls per case                                                                                                                                                                                                                                                 |                    |
| Variables                 | 7      | Clearly define all outcomes, exposures, predictors, potential confounders, and effect modifiers. Give diagnostic criteria, if applicable                                                                                                                                                                                                                                                                                                                               | 6                  |
| Data sources/ measurement | 8*     | For each variable of interest, give sources of data and details of methods of assessment (measurement). Describe comparability of assessment methods if there is more than one group                                                                                                                                                                                                                                                                                   | 4, 5, 6,7          |
| Bias                      | 9      | Describe any efforts to address potential sources of bias                                                                                                                                                                                                                                                                                                                                                                                                              |                    |
| Study size                | 10     | Explain how the study size was arrived at                                                                                                                                                                                                                                                                                                                                                                                                                              | 4,5,6              |
| Quantitative variables    | 11     | Explain how quantitative variables were handled in the analyses. If applicable, describe which groupings were chosen and why                                                                                                                                                                                                                                                                                                                                           | 4                  |
| Statistical methods       | 12     | (a) Describe all statistical methods, including those used to control for confounding                                                                                                                                                                                                                                                                                                                                                                                  | 7                  |
|                           |        | (b) Describe any methods used to examine subgroups and interactions                                                                                                                                                                                                                                                                                                                                                                                                    | 7                  |
|                           |        | (c) Explain how missing data were addressed                                                                                                                                                                                                                                                                                                                                                                                                                            |                    |
|                           |        | (d) <i>Cohort study</i> —If applicable, explain how loss to follow-up was addressed<br><i>Case-control study</i> —If applicable, explain how matching of cases and controls was addressed                                                                                                                                                                                                                                                                              |                    |



|                          |     |                                                                                                                                                                                                              |          |
|--------------------------|-----|--------------------------------------------------------------------------------------------------------------------------------------------------------------------------------------------------------------|----------|
|                          |     | <i>Cross-sectional study</i> —If applicable, describe analytical methods taking account of sampling strategy                                                                                                 |          |
|                          |     | (e) Describe any sensitivity analyses                                                                                                                                                                        | 7        |
| <b>Results</b>           |     |                                                                                                                                                                                                              |          |
| Participants             | 13* | (a) Report numbers of individuals at each stage of study—eg numbers potentially eligible, examined for eligibility, confirmed eligible, included in the study, completing follow-up, and analysed            | 5,6      |
|                          |     | (b) Give reasons for non-participation at each stage                                                                                                                                                         | 5,6      |
|                          |     | (c) Consider use of a flow diagram                                                                                                                                                                           |          |
| Descriptive data         | 14* | (a) Give characteristics of study participants (eg demographic, clinical, social) and information on exposures and potential confounders                                                                     | 7,8      |
|                          |     | (b) Indicate number of participants with missing data for each variable of interest                                                                                                                          |          |
|                          |     | (c) <i>Cohort study</i> —Summarise follow-up time (eg, average and total amount)                                                                                                                             |          |
| Outcome data             | 15* | <i>Cohort study</i> —Report numbers of outcome events or summary measures over time                                                                                                                          |          |
|                          |     | <i>Case-control study</i> —Report numbers in each exposure category, or summary measures of exposure                                                                                                         |          |
|                          |     | <i>Cross-sectional study</i> —Report numbers of outcome events or summary measures                                                                                                                           | 7-10     |
| Main results             | 16  | (a) Give unadjusted estimates and, if applicable, confounder-adjusted estimates and their precision (eg, 95% confidence interval). Make clear which confounders were adjusted for and why they were included |          |
|                          |     | (b) Report category boundaries when continuous variables were categorized                                                                                                                                    |          |
|                          |     | (c) If relevant, consider translating estimates of relative risk into absolute risk for a meaningful time period                                                                                             |          |
| Other analyses           | 17  | Report other analyses done—eg analyses of subgroups and interactions, and sensitivity analyses                                                                                                               |          |
| <b>Discussion</b>        |     |                                                                                                                                                                                                              |          |
| Key results              | 18  | Summarise key results with reference to study objectives                                                                                                                                                     | 10       |
| Limitations              | 19  | Discuss limitations of the study, taking into account sources of potential bias or imprecision. Discuss both direction and magnitude of any potential bias                                                   | 12       |
| Interpretation           | 20  | Give a cautious overall interpretation of results considering objectives, limitations, multiplicity of analyses, results from similar studies, and other relevant evidence                                   | 10,11,12 |
| Generalisability         | 21  | Discuss the generalisability (external validity) of the study results                                                                                                                                        | 12       |
| <b>Other information</b> |     |                                                                                                                                                                                                              |          |
| Funding                  | 22  | Give the source of funding and the role of the funders for the present study and, if applicable, for the original study on which the present article is based                                                | 16       |

\*Give information separately for cases and controls in case-control studies and, if applicable, for exposed and unexposed groups in cohort and cross-sectional studies.

**Note:** An Explanation and Elaboration article discusses each checklist item and gives methodological background and published examples of transparent reporting. The STROBE checklist is best used in conjunction with this article (freely available on the Web sites of PLoS Medicine at <http://www.plosmedicine.org/>, Annals of Internal Medicine at <http://www.annals.org/>, and Epidemiology at <http://www.epidem.com/>). Information on the STROBE Initiative is available at [www.strobe-statement.org](http://www.strobe-statement.org).
