# Supplementary material for: Adaptation and validation of the Physical Activity Questionnaire for Adolescents (PAQ-A) among Polish adolescents: cross-sectional study
Source: PubMed Central journal article supplement — BMJ Open. 2019 Nov 18;9(11):e030567. doi: 10.1136/bmjopen-2019-030567 (PMC6887051; doi:10.1136/bmjopen-2019-030567), 2019-11-18
Supplement: bmjopen-2019-030567supp001.pdf [file bmjopen-2019-030567supp001.pdf]

## Kwestionariusz Aktywności Fizycznej dla Młodzieży

### Polish version of the Physical Activity Questionnaire for Adolescents (PAQ-A)

Imię i nazwisko: \_\_\_\_\_

Wiek: \_\_\_\_\_

Płeć: K \_\_\_\_\_ M \_\_\_\_\_

Klasa: \_\_\_\_\_

Podajemy próbę oceny poziomu Twojej aktywności fizycznej w *ostatnich 7 dniach* (w ciągu ostatniego tygodnia). Odnosi się to do aktywności, które powodują, że się pocisz lub jesteś zmęczony/a, albo do zabaw, które sprawiają, że oddychasz z wysiłkiem, takich jak: podskakiwanie, bieganie, wspinanie się itp.

**Pamiętaj:**

- Nie ma złych lub dobrych odpowiedzi - to nie jest sprawdzian.
- Proszę, odpowiedz na wszystkie pytania tak szczerze i dokładnie jak potrafisz - to bardzo ważne.

**1. Aktywność fizyczna w Twoim wolnym czasie:**

**Czy wykonywałeś/aś którekolwiek z następujących czynności w ciągu *ostatnich 7 dni* (ostatniego tygodnia)? Jeśli tak, ile razy w tygodniu? (Zaznacz tylko jedno kółko w rzędzie).**

|                            | 0                     | 1-2                   | 3-4                   | 5-6                   | 7 lub więcej<br>razy  |
|----------------------------|-----------------------|-----------------------|-----------------------|-----------------------|-----------------------|
| Skakanie na skakance       | <input type="radio"/> |
| Wiosłowanie/kajakowanie    | <input type="radio"/> |
| Jazda na rolkach           | <input type="radio"/> |
| Zabawa w berka             | <input type="radio"/> |
| Maszerowanie dla sportu    | <input type="radio"/> |
| Jazda na rowerze           | <input type="radio"/> |
| Jogging/bieganie           | <input type="radio"/> |
| Aerobik                    | <input type="radio"/> |
| Pływanie                   | <input type="radio"/> |
| Gra w palanta/baseball     | <input type="radio"/> |
| Taniec                     | <input type="radio"/> |
| Rugby/football amerykański | <input type="radio"/> |
| Badminton                  | <input type="radio"/> |
| Jazda na deskorolce        | <input type="radio"/> |
| Piłka nożna                | <input type="radio"/> |
| Hokej na ulicy             | <input type="radio"/> |
| Piłka siatkowa             | <input type="radio"/> |
| Unihokej                   | <input type="radio"/> |
| Piłka koszykowa            | <input type="radio"/> |
| Jazda na łyżwach           | <input type="radio"/> |
| Narciarstwo biegowe        | <input type="radio"/> |
| Hokej na lodzie            | <input type="radio"/> |
| Podnoszenie ciężarów       | <input type="radio"/> |
| Gimnastyka                 | <input type="radio"/> |
| Piłka ręczna               | <input type="radio"/> |
| Jazda na nartach           | <input type="radio"/> |
| Tenis ziemny               | <input type="radio"/> |
| Tenis stołowy              | <input type="radio"/> |
| Sporty/sztuki walki        | <input type="radio"/> |
| Jazda konna                | <input type="radio"/> |
| Inne:                      |                       |                       |                       |                       |                       |
| _____                      | <input type="radio"/> |
| _____                      | <input type="radio"/> |

- 2. Jak często w ciągu ostatnich 7 dni, w trakcie *lekcji wychowania fizycznego (WF)* byłeś/aś bardzo aktywny/a (intensywne granie, bieganie, skakanie, rzucanie)? (Zaznacz tylko jedną odpowiedź).**

Nie brałem udziału w lekcji WF .....  O  
 Prawie nigdy .....  O  
 Czasami .....  O  
 Dostyc często .....  O  
 Zawsze .....  O

- 3. Co zazwyczaj robiłeś/aś w czasie przerwy obiadowej w ciągu ostatnich 7 dni oprócz spożywania posiłku? (Zaznacz tylko jedną odpowiedź).**

Siedziałem/am (rozmawiając, czytając, odrabiając zadania domowe) ...  O  
 Stałem/am lub spacerowałem/am .....  O  
 Trochę biegałem/am lub grałem/am .....  O  
 Biegałem/am lub grałem/am dość duzo .....  O  
 Biegałem/am lub grałem/am intensywnie przez większość czasu .....  O

- 4. W ciągu ostatnich 7 dni, przez ile dni *zaraz po szkole* uprawiałeś/aś jakiś sport, trenowałeś/aś taniec, lub grałeś/aś w gry, podczas których byłeś/aś bardzo aktywny/a? (Zaznacz tylko jedną odpowiedź).**

W żaden dzień .....  O  
 1 raz w tygodniu .....  O  
 2 lub 3 razy w tygodniu .....  O  
 4 razy w tygodniu .....  O  
 5 razy w tygodniu .....  O

- 5. W ciągu ostatnich 7 dni, przez ile dni *wieczorami* uprawiałeś/aś jakiś sport, trenowałeś/aś taniec lub grałeś/aś w gry, podczas których byłeś/aś bardzo aktywny/a? (Zaznacz tylko jedną odpowiedź).**

W żaden dzień .....  O  
 1 raz w tygodniu .....  O  
 2 lub 3 razy w tygodniu .....  O  
 4 lub 5 razy w tygodniu .....  O  
 6 lub 7 razy w tygodniu .....  O

- 6. *Podczas ostatniego weekendu*, ile razy uprawiałeś/aś jakiś sport, tańczyłeś/aś lub grałeś/aś w gry, podczas których byłeś/aś bardzo aktywny/a? (Zaznacz tylko jedną odpowiedź).**

Ani razu .....  O  
 1 raz .....  O  
 2 lub 3 razy .....  O  
 4 lub 5 razy .....  O  
 6 lub więcej razy .....  O

**7. Które z następujących pięciu stwierdzeń najlepiej opisują Ciebie w ciągu ostatnich 7 dni? Przeczytaj wszystkie pięć stwierdzeń zanim zaznaczysz jedną odpowiedź odnoszącą się do Ciebie. (Zaznacz tylko jedną odpowiedź).**

- Cały lub większość czasu spędzałem/am wykonując rzeczy, które wymagały bardzo mało wysiłku fizycznego
- Czasami (1-2 razy w zeszłym tygodniu) byłem/am aktywny/a fizycznie w wolnym czasie (np. uprawiałem/am jakiś sport, biegałem/am, jeździłem/am rowerem, pływałem/am, ćwiczyłem/am aerobik)
- Często (3-4 razy w zeszłym tygodniu) byłem/am aktywny/a fizycznie w wolnym czasie
- Dosyć często (5-6 razy w zeszłym tygodniu) byłem/am aktywny/a fizycznie w wolnym czasie
- Bardzo często (7 lub więcej razy w zeszłym tygodniu) byłem/am aktywny/a fizycznie w wolnym czasie

**8. Zaznacz jak często byłeś/aś aktywny/a fizycznie każdego dnia w ciągu ostatniego tygodnia (np. uprawiając jakiś sport, uczestnicząc w grach ruchowych, tańcząc lub wykonując inne formy aktywności fizycznej).**

|              | Wcale                 | Trochę                | Średnio               | Często                | Bardzo często         |
|--------------|-----------------------|-----------------------|-----------------------|-----------------------|-----------------------|
| Poniedziałek | <input type="radio"/> |
| Wtorek       | <input type="radio"/> |
| Środa        | <input type="radio"/> |
| Czwartek     | <input type="radio"/> |
| Piątek       | <input type="radio"/> |
| Sobota       | <input type="radio"/> |
| Niedziela    | <input type="radio"/> |

**9. Czy byłeś/aś chory/a w ciągu ostatniego tygodnia lub zdarzyło się coś, co powstrzymało Cię przed zwykle wykonywaną aktywnością fizyczną? (Zaznacz jedną opcję).**

Tak .....

Nie .....

Jeśli tak, to co uniemożliwiło Ci podjęcie tej aktywności? \_\_\_\_\_
